# Supplementary material for: A Systematic Analysis of Cell Cycle Regulators in Yeast Reveals That Most Factors Act Independently of Cell Size to Control Initiation of Division
Source: PLoS Genet. 2012 Mar 15;8(3):e1002590. doi: 10.1371/journal.pgen.1002590 (PMC3305459; doi:10.1371/journal.pgen.1002590)
Supplement: Dataset S1 — Searchable spreadsheet of all the primary data, arranged in different worksheets. In the worksheet entitled “Data and Correlation”, we list the experimental data we obtained, representing mean average values for individual deletions, organized by plate ID. Data from our study are correlated to growth and cell size data from the indicated studies, and descriptions from the Saccharomyces Genome Database (SGD; http://www.yeastgenome.org/). In the worksheet entitled “INCLUDED Experiments”, we list all our flow cytometry individual experiments that were included in the final analysis. Raw .fcs files can be accessed at Cytobank (www.cytobank.org). Public experiment name: “Yeast DNA Content Project – DELETION – INCLUDED.” In the worksheet entitled “EXCLUDED Experiments”, we list individual experiments that were excluded from the final analysis for various reasons, but which may represent valid flow cytometry profiles. Cytobank public experiment name: “Yeast DNA Content Project – DELETION – EXCLUDED.” Finally, in the worksheet entitled “Explanation,” we provide further detailed descriptions of each parameter listed in the previous worksheets. (XLS) [file pgen.1002590.s001.xls]

## Sheet: Explanation
YEAST DNA CONTENT PROJECT - DELETION - MASTER EXPERIMENT LIST
Data and Correlation:	Experimental data, representing mean average values for individual deletions, organized by plate ID, see below. Data from this study are correlated to growth and cell size data from the indicated studies, and descriptions from SGD.
INCLUDED Experiments:	List of all individual experiments that were included in the final analysis. Raw .fcs files can be accessed at Cytobank (www.cytobank.org). Requires free registration. Public experiment name: "Yeast DNA Content Project - DELETION - INCLUDED".
EXCLUDED Experiments:	List of individual experiments that were excluded from the final analysis for various reasons, but which may represent valid flow cytometry profiles. Cytobank public experiment name: "Yeast DNA Content Project - DELETION - EXCLUDED".
Explanation of tables:
COLUMN HEADING	VALUE CREATED BY	VALUE CREATED IN	VALUE CREATED AT	DESCRIPTION
Plate ID / gene	S. cerevisiae homozygous diploid deletion panel	panel documentation	n/a	Deletion panel well location
ORF	S. cerevisiae homozygous diploid deletion panel	panel documentation	n/a	Open reading frame corresponding to indicated Plate ID
# exp	MS Excel	MS Excel spreadsheet	PivotTable analysis of total included data	Number of experiments for indicated Plate ID
%G1 (avg)	MS Excel	MS Excel spreadsheet	PivotTable analysis of total included data	Mean average %G1 for indicated Plate ID
%G1 (std)	MS Excel	MS Excel spreadsheet	PivotTable analysis of total included data	Standard deviation of mean average %G1 values for indicated Plate ID
Mean FSC-H (avg)	MS Excel	MS Excel spreadsheet	PivotTable analysis of total included data	Mean average of mean FSC-H values for indicated Plate ID
Mean FSC-H (std)	MS Excel	MS Excel spreadsheet	PivotTable analysis of total included data	Standard deviation of mean FSC-H values for indicated Plate ID
Median FSC-H (avg)	MS Excel	MS Excel spreadsheet	PivotTable analysis of total included data	Mean average of median FSC-H values for indicated Plate ID
Median FSC-H (std)	MS Excel	MS Excel spreadsheet	PivotTable analysis of total included data	Standard deviation of median FSC-H values for indicated Plate ID
COLUMN HEADING	VALUE CREATED BY	VALUE CREATED IN	VALUE CREATED AT	DESCRIPTION
RMS (FL1/2-A)	FlowJo software	FlowJo workspace & table	application of cell-cycle model	Root mean square of the fit of the cell-cycle model
Freq. G1 (FL1/2-A)	FlowJo software	FlowJo workspace & table	application of cell-cycle model	Percentage of cells in model G1 peak
Freq. S (FL1/2-A)	FlowJo software	FlowJo workspace & table	application of cell-cycle model	Percentage of cells in model S peak(s)
Freq. G2 (FL1/2-A)	FlowJo software	FlowJo workspace & table	application of cell-cycle model	Percentage of cells in model G2 peak
G1 Mean (FL1/2-A)	FlowJo software	FlowJo workspace & table	application of cell-cycle model	Fluorescence (x-axis) mean of the model G1 peak
G2 Mean (FL1/2-A)	FlowJo software	FlowJo workspace & table	application of cell-cycle model	Fluorescence (x-axis) mean of the model G2 peak
G1 cv (FL1/2-A)	FlowJo software	FlowJo workspace & table	application of cell-cycle model	Coefficient of variation of model G1 peak
G2 cv (FL1/2-A)	FlowJo software	FlowJo workspace & table	application of cell-cycle model	Coefficient of variation of model G2 peak
Freq. sub-G1 (FL1/2-A)	FlowJo software	FlowJo workspace & table	application of cell-cycle model	Percentage of cells in model sub-G1
Freq. super-G2 (FL1/2-A)	FlowJo software	FlowJo workspace & table	application of cell-cycle model	Percentage of cells in model super-G2
Ungated count	flow cytometry software	.fcs file	acquisition of flow cytometry data	Count of total events collected during cytometry
Gated count	FlowJo software (user defined)	FlowJo workspace & table	application of FSC-H v. FL1/2-A gate	Count of contiguous population of events enclosed by the defined gate
Mean (FSC-H)	FlowJo software (user defined)	FlowJo workspace & table	application of statistic	Mean FSC-H value for gated events
Median (FSC-H)	FlowJo software (user defined)	FlowJo workspace & table	application of statistic	Median FSC-H value for gated events
StdDev (FSC-H)	FlowJo software (user defined)	FlowJo workspace & table	application of statistic	Standard deviation of FSC-H values for gated events
%G1	MS Excel (user defined)	MS Excel spreadsheet	transfer of FlowJo tabular data	%G1 = (Freq. G1) / (Freq. G1 + Freq. G2)
FL1/2-A	CellQuest software	.fcs file	acquisition of flow cytometry data	Defines the fluorescence channel to which the Sytox-area parameter is assigned
File name	CellQuest software	.fcs file	acquisition of flow cytometry data	Name of the .fcs (flow cytometry) file
Sample ID	CellQuest software (user defined)	.fcs file	acquisition of flow cytometry data	Internal laboratory standard for experiment identification: deletion plate number (###), row letter (L), column number (##), overnight culture date (YYMMDD), researcher initials, and any modifiers
Corrected Sample ID	researcher	MS Excel spreadsheet	annotation	(If needed) Correction of Sample ID incorrectly entered at time of flow cytometry data acquisition
Sample ID changed?	MS Excel (user defined)	MS Excel spreadsheet	correction of Sample ID	Indicates difference in file Sample ID and corrected Sample ID
Annotation	researcher	MS Excel spreadsheet	annotation	Miscellaneous non-standardized observations on the part of researchers. May pertain to cell plates, cultures, cytometry, data, analysis, and/or researcher decisions/actions.
Include?	researcher and/or MS Excel (user defined)	MS Excel spreadsheet	multiple	Designation of inclusion in the final analysis: "Y", yes; "N", no; "NQ", no after additional inspection; "N-RMS", excluded because of high RMS
Plate ID	MS Excel (user defined) from corrected Sample ID	MS Excel spreadsheet	confirmation of correct Sample ID	Deletion panel well location
Growth date	MS Excel (user defined) from corrected Sample ID	MS Excel spreadsheet	confirmation of correct Sample ID	Date of sample overnight culture
Researcher	MS Excel (user defined) from corrected Sample ID	MS Excel spreadsheet	confirmation of correct Sample ID	Researcher initials
Modifiers	MS Excel (user defined) from corrected Sample ID	MS Excel spreadsheet	confirmation of correct Sample ID	Modifiers pertaining to the experiment (e.g. initial time course or SYTOX concentration experiments)
"Data and Correlation" color coding:
BY4743	Wild-type diploid control strain
Low %G1	Low %G1 results that were more than two standard deviations less than the WT %G1 mean average
High %G1	High %G1 results that were more than two standard deviations greater than the WT %G1 mean average

## Sheet: Data and Correlation
YDCP data									Giaever et al., Nature 2002	Jorgensen et al., Science 2002		Zhang et al., Current Biol 2002			Saccharomyces Genome Database
Plate ID / gene	ORF	# exp	%G1 (avg)	%G1 (std)	Mean FSC-H (avg)	Mean FSC-H (std)	Median FSC-H (avg)	Median FSC-H (std)	Growth coefficient	Mean	Median	Mean	Median	Mode	ORF	Common	Alias(es)	Description
335B10	YDR004W	3	0.0880456	0.0306459	121.803	13.3663	113.023	12.1994	3.5	48.4691	43.9967	61.98	63.93	57.08	YDR004W	RAD57		Protein that stimulates strand exchange by stabilizing the binding of Rad51p to single-stranded DNA; involved in the recombinational repair of double-strand breaks in DNA during vegetative growth and meiosis; forms heterodimer with Rad55p
302F01	YLR079W	7	0.103702	0.0756211	130.493	16.6414	125.784	20.3339	7.8	48.1552	41.6297	53.53	55.87	25.11	YLR079W	SIC1	SDB25	Inhibitor of Cdc28-Clb kinase complexes that controls G1/S phase transition, preventing premature S phase and ensuring genomic integrity; phosphorylation targets Sic1p for SCF(CDC4)-dependent turnover; functional homolog of mammalian Kip1
344H08	YBR119W	4	0.116522	0.0391767	113.108	7.75702	105.77	7.79386	1	43.1939	40.1944	61.37	66.36	65.29	YBR119W	MUD1	U1A U1-A	U1 snRNP A protein, homolog of human U1-A; involved in nuclear mRNA splicing
330F02	YNL250W	3	0.120508	0.042201	162.137	7.37165	160.327	9.02935	8.4	57.2188	51.9686	67.08	72.58	47.95	YNL250W	RAD50		Subunit of MRX complex, with Mre11p and Xrs2p, involved in processing double-strand DNA breaks in vegetative cells, initiation of meiotic DSBs, telomere maintenance, and nonhomologous end joining
317C01	YKL101W	3	0.125289	0.0405099	149.547	3.78603	143.62	3.80078	1	55.2519	51.9686	61.56	65.53	59.81	YKL101W	HSL1	ELM2 NIK1	Nim1p-related protein kinase that regulates the morphogenesis and septin checkpoints; associates with the assembled septin filament; required along with Hsl7p for bud neck recruitment, phosphorylation, and degradation of Swe1p
301F11	YLL002W	3	0.143252	0.0668286	175.963	4.91732	168.513	5.33644	5.9	57.9671	53.3272	65.18	71.19	55.27	YLL002W	RTT109	KAT11 REM50 KIM2	Histone acetyltransferase critical for cell survival in the presence of DNA damage during S phase; acetylates H3-K56 and H3-K9; involved in non-homologous end joining and in regulation of Ty1 transposition; interacts physically with Vps75p
304C11	YMR190C	3	0.151615	0.0471471	120.163	4.24116	111.58	4.32584	4.5	48.2144	43.9967	54.81	59	47.94	YMR190C	SGS1		Nucleolar DNA helicase of the RecQ family involved in genome integrity maintenance; regulates chromosome synapsis and meiotic joint molecule/crossover formation; similar to human BLM and WRN proteins implicated in Bloom and Werner syndromes
324H06	YBL058W	3	0.163767	0.0487293	136.877	16.5093	127.833	17.437	9.1	55.7773	50.965	45	44.3	25.11	YBL058W	SHP1	UBX1	UBX (ubiquitin regulatory X) domain-containing protein that regulates Glc7p phosphatase activity and interacts with Cdc48p; interacts with ubiquitylated proteins in vivo and is required for degradation of a ubiquitylated model substrate
332E08	YJL047C	4	0.171884	0.0587543	126.547	14.6125	120.02	15.7245	1	51.1187	45.2132	58.89	62.97	30.58	YJL047C	RTT101	CULC CULLIN 8 CUL8	Cullin subunit of a Roc1p-dependent E3 ubiquitin ligase complex with a role in anaphase progression; implicated in Mms22-dependent DNA repair; involved with Mms1p in nonfunctional rRNA decay; modified by the ubiquitin-like protein, Rub1p
327D09	YDR318W	3	0.172673	0.0531087	137.023	6.20142	130.727	8.08373	1	48.9429	45.2132	64.78	70.15	62.55	YDR318W	MCM21	CTF5	Protein involved in minichromosome maintenance; component of the COMA complex (Ctf19p, Okp1p, Mcm21p, Ame1p) that bridges kinetochore subunits that are in contact with centromeric DNA and the subunits bound to microtubules
345C10	YDL013W	3	0.176597	0.0718688	149.323	15.2669	139.567	18.6814	8.4	52.4421	48.3519	61.19	65.26	39.73	YDL013W	SLX5	ULS2 HEX3	Subunit of the Slx5-Slx8 SUMO-targeted ubiquitin ligase (STUbL) complex, stimulated by SUMO-modified substrates; contains a RING domain and two SIMs (SUMO-interacting motifs); forms SUMO-dependent nuclear foci, including DNA repair centers
323E04	YPR164W	3	0.192107	0.118877	136.237	10.3226	128.23	10.8907	3.5	55.0456	48.3519	63.74	66.4	40.65	YPR164W	MMS1	RTT108 SLM6	Subunit of an E3 ubiquitin ligase complex involved in resolving replication intermediates or preventing the damage caused by blocked replication forks; regulates Ty1 transposition; involved with Rtt101p in nonfunctional rRNA decay
311D11	YDR414C	3	0.192753	0.030851	105.793	6.13924	96.5233	4.91754	1	50.6053	45.2132	72.79	63.43	35.16	YDR414C	ERD1	LDB2	Predicted membrane protein required for the retention of lumenal endoplasmic reticulum proteins; mutants secrete the endogenous ER protein, BiP (Kar2p)
323B07	YPR119W	4	0.194739	0.0229635	150.695	22.0495	145.9	21.6982	1	63.9585	61.2244	68.93	70.28	52.51	YPR119W	CLB2		B-type cyclin involved in cell cycle progression; activates Cdc28p to promote the transition from G2 to M phase; accumulates during G2 and M, then targeted via a destruction box motif for ubiquitin-mediated degradation by the proteasome
326F08	YKR047W	3	0.204729	0.0537557	116.353	1.44001	108.237	1.14282	1	45.0548	41.0516	45.12	47.65	47.05	YKR047W
314G05	YHR143W	3	0.204916	0.0329665	100.053	3.79832	92.1267	2.99453	1	46.2055	42.5071	46.17	50.6	38.82	YHR143W	DSE2		Daughter cell-specific secreted protein with similarity to glucanases, degrades cell wall from the daughter side causing daughter to separate from mother; expression is repressed by cAMP
347C02	YER116C	3	0.208301	0.0517028	117.797	4.38183	110.483	3.80969	6.1	54.0197	50.3031	51.63	54.26	36.06	YER116C	SLX8		Subunit of the Slx5-Slx8 SUMO-targeted ubiquitin ligase (STUbL) complex; stimulated by prior attachment of SUMO to the substrate; contains a C-terminal RING domain
330A08	YER095W	3	0.208543	0.0978798	121.977	4.93443	111.29	5.74212	4.8	45.0828	38.7924	76.06	64.93	22.38	YER095W	RAD51	MUT5	Strand exchange protein, forms a helical filament with DNA that searches for homology; involved in the recombinational repair of double-strand breaks in DNA during vegetative growth and meiosis; homolog of Dmc1p and bacterial RecA protein
322H11	YPL018W	1	0.210937		124.71		117.88		1	47.8735	44.6022	65.69	66.99	50.7	YPL018W	CTF19	MCM18	Outer kinetochore protein, required for accurate mitotic chromosome segregation; component of the kinetochore sub-complex COMA (Ctf19p, Okp1p, Mcm21p, Ame1p) that functions as a platform for kinetochore assembly
347E01	YER143W	1	0.211291		105.47		95.49		1	45.0166	41.6297	48.32	51.1	44.3	YER143W	DDI1	VSM1	DNA damage-inducible v-SNARE binding protein with a role in suppression of protein secretion; may play a role in S-phase checkpoint control; has ubiquitin-associated (UBA), ubiquitin-like (UBL), and retroviral-like proteinase (RVP) domains
326F09	YKR048C	3	0.211394	0.0920614	126.847	10.7057	117.247	9.08775	1	46.5604	42.5071	53.36	54.47	48.87	YKR048C	NAP1		Protein that interacts with mitotic cyclin Clb2p; required for the regulation of microtubule dynamics during mitosis; controls bud morphogenesis; involved in the transport of H2A and H2B histones to the nucleus; phosphorylated by CK2
330H05	YML106W	1	0.211514		104.56		95.3		1	40.1707	37.4233	48.22	49.75	47.05	YML106W	URA5	PYR5	Major orotate phosphoribosyltransferase (OPRTase) isozyme that catalyzes the fifth enzymatic step in de novo biosynthesis of pyrimidines, converting orotate into orotidine-5'-phosphate; minor OPRTase encoded by URA10
306B04	YOR035C	1	0.211792		108.46		102.09		7.8	50.3984	45.2132	22.49	19.9	12.33	YOR035C	SHE4	DIM1	Protein containing a UCS (UNC-45/CRO1/SHE4) domain, binds to myosin motor domains to regulate myosin function; involved in endocytosis, polarization of the actin cytoskeleton, and asymmetric mRNA localization
323E02	YPR159W	2	0.211833	0.0167666	86.815	0.431335	80.84	0.0848528	3.6	66.1956	65.4498	76.44	64.33	41.56	YPR159W	KRE6	CWH48	Type II integral membrane protein required for beta-1,6 glucan biosynthesis; putative beta-glucan synthase; localizes to the ER, plasma membrane, sites of polarized growth and secretory vesicles; functionally redundant with Skn1p
325D08	YGL043W	1	0.21188		91.74		86.61		1	42.9186	38.7924	45.12	47.02	44.3	YGL043W	DST1	TFIIS S-II SII PPR2 P37	General transcription elongation factor TFIIS, enables RNA polymerase II to read through blocks to elongation by stimulating cleavage of nascent transcripts stalled at transcription arrest sites
336E03	YJR043C	2	0.212233	0.0493872	136.255	3.74059	128.14	2.53144	1	53.5008	49.647	62.62	66.87	63.47	YJR043C	POL32		Third subunit of DNA polymerase delta, involved in chromosomal DNA replication; required for error-prone DNA synthesis in the presence of DNA damage and processivity; interacts with Hys2p, PCNA (Pol30p), and Pol1p
318B02	YOR131C	1	0.212511		89.99		82.57		1	43.5018	39.6296	48.38	50.57	50.7	YOR131C			Putative protein of unknown function; non-essential gene; overexpression causes a cell cycle delay or arrest
345A04	YBR134W	1	0.212963		143.74		135.4		1	44.625	41.0516	70.77	74.22	66.2	YBR134W
304A10	YMR158W-A	1	0.213176		110.03		100.62		1	43.2901	39.6296	46.7	49.61	53.43	YMR158W-A
308C06	YPL253C	1	0.213477		126.41		118.16		1	45.3586	41.6297	52.37	56.68	56.19	YPL253C	VIK1		Protein that forms a complex with Kar3p at the spindle pole body, possible regulator of Kar3p function in microtubule-mediated processes; required for sister chromatid cohesion; has similarity to Cik1p
332C04	YJL092W	1	0.214336		118.42		108.26		1	45.7073	41.0516	56.93	58.05	50.7	YJL092W	SRS2	RADH1 RADH HPR5	DNA helicase and DNA-dependent ATPase involved in DNA repair, needed for proper timing of commitment to meiotic recombination and transition from Meiosis I to II; blocks trinucleotide repeat expansion; affects genome stability
307A11	YOR351C	1	0.214612		101.48		91.48		1	43.1192	39.6296	51.77	53.05	53.43	YOR351C	MEK1	MRE4	Meiosis-specific serine/threonine protein kinase, functions in meiotic checkpoint, promotes recombination between homologous chromosomes by suppressing double strand break repair between sister chromatids
331G02	YPR061C	1	0.214703		131.63		122.94		1	44.6132	41.6297	67.08	56.16	51.61	YPR061C	JID1		Probable Hsp40p co-chaperone, has a DnaJ-like domain and appears to be involved in ER-associated degradation of misfolded proteins containing a tightly folded cytoplasmic domain; inhibits replication of Brome mosaic virus in S. cerevisiae
330A01	YDR424C	1	0.214829		106.01		96.77		1	45.4376	41.6297	51.22	45.18	48.87	YDR424C	DYN2	SLC1	Cytoplasmic light chain dynein, microtubule motor protein; proposed to be involved in the assembly of the nuclear pore complex
346A08	YDR459C	1	0.215		102.57		95.45		1	45.6338	42.5071	44.94	47.27	46.11	YDR459C	PFA5		Palmitoyltransferase with autoacylation activity; likely functions in pathway(s) outside Ras; member of a family of putative palmitoyltransferases containing an Asp-His-His-Cys-cysteine rich (DHHC-CRD) domain
310D05	YDR076W	2	0.21583	0.0419122	127.05	8.54185	115.565	9.0439	3	49.4042	45.2132	55.66	57.91	50.7	YDR076W	RAD55		Protein that stimulates strand exchange by stabilizing the binding of Rad51p to single-stranded DNA; involved in the recombinational repair of double-strand breaks in DNA during vegetative growth and meiosis; forms heterodimer with Rad57p
334G07	YDL192W	1	0.215842		98.31		91.52		3.6	44.6706	40.1944	51.94	54.6	53.43	YDL192W	ARF1		ADP-ribosylation factor, GTPase of the Ras superfamily involved in regulation of coated vesicle formation in intracellular trafficking within the Golgi; functionally interchangeable with Arf2p
344C03	YFL042C	1	0.215843		92.5		81.97		1	41.6697	38.2408	49.42	52.07	47.05	YFL042C		YFL043C	Putative protein of unknown function; YFL042C is not an essential gene
341G07	YDR205W	1	0.216357		103.16		95.22		1	46.5932	43.0989	49.97	53.19	48.87	YDR205W	MSC2		Member of the cation diffusion facilitator family, localizes to the endoplasmic reticulum and nucleus; mutations affect the cellular distribution of zinc and also confer defects in meiotic recombination between homologous chromatids
343G01	YOR302W	1	0.217198		104.21		95.93		1	44.6051	41.6297	50.87	53.19	47.94	YOR302W			CPA1 uORF, Arginine attenuator peptide, regulates translation of the CPA1 mRNA
307C06	YOR377W	2	0.217428	0.0174076	91.955	15.1392	82.73	13.3643	1	43.4579	40.1944	67.53	55.58	19.63	YOR377W	ATF1		Alcohol acetyltransferase with potential roles in lipid and sterol metabolism; responsible for the major part of volatile acetate ester production during fermentation
343C06	YOR298C-A	1	0.21911		100.33		92.03		1	44.3209	41.0516	47.74	49.81	52.51	YOR298C-A	MBF1	SUF13	Transcriptional coactivator that bridges the DNA-binding region of Gcn4p and TATA-binding protein Spt15p; suppressor of frameshift mutations
322E08	YPL069C	1	0.219347		101.74		93.76		5	45.0462	41.6297	46.95	50.47	46.11	YPL069C	BTS1		Geranylgeranyl diphosphate synthase, increases the intracellular pool of geranylgeranyl diphosphate, suppressor of bet2 mutation that causes defective geranylgeranylation of small GTP-binding proteins that mediate vesicular traffic
333A06	YJR075W	1	0.219408		99.19		90.47		1	54.4076	50.965	68.14	55.1	21.46	YJR075W	HOC1		Alpha-1,6-mannosyltransferase involved in cell wall mannan biosynthesis; subunit of a Golgi-localized complex that also contains Anp1p, Mnn9p, Mnn11p, and Mnn10p; identified as a suppressor of a cell lysis sensitive pkc1-371 allele
336H08	YDL131W	1	0.219871		98.49		90.68		1	43.7095	40.1944	51.6	52.95	46.11	YDL131W	LYS21		Homocitrate synthase isozyme, catalyzes the condensation of acetyl-CoA and alpha-ketoglutarate to form homocitrate, which is the first step in the lysine biosynthesis pathway; highly similar to the other isozyme, Lys20p
346A04	YDR455C	1	0.22		107.1		100.51		1	43.0943	40.1944	46.11	47.68	41.54	YDR455C
301E05	YAR014C	3	0.220295	0.0646063	109.747	10.6455	99.1733	13.9506	1	51.9808	48.3519	52.61	57.69	48.87	YAR014C	BUD14		Protein involved in bud-site selection, Bud14p-Glc7p complex is a cortical regulator of dynein; inhibitor of the actin assembly factor Bnr1p (formin); diploid mutants display a random budding pattern instead of the wild-type bipolar pattern
343B07	YML075C	1	0.220642		98.13		90.79		1	43.2064	40.1944	46.76	49.88	44.3	YML075C	HMG1		One of two isozymes of HMG-CoA reductase that catalyzes the conversion of HMG-CoA to mevalonate, which is a rate-limiting step in sterol biosynthesis; localizes to the nuclear envelope; overproduction induces the formation of karmellae
343B08	YML076C	1	0.22096		96.78		88.47		1	44.3225	41.6297	47.84	49.81	46.11	YML076C	WAR1		Homodimeric Zn2Cys6 zinc finger transcription factor; binds to a weak acid response element to induce transcription of PDR12 and FUN34, encoding an acid transporter and a putative ammonia transporter, respectively
318B04	YOR133W	1	0.221255		85.13		79.15		1	44.7247	41.0516	48.38	51.5	52.51	YOR133W	EFT1		Elongation factor 2 (EF-2), also encoded by EFT2; catalyzes ribosomal translocation during protein synthesis; contains diphthamide, the unique posttranslationally modified histidine residue specifically ADP-ribosylated by diphtheria toxin
343A05	YLR334C	1	0.221951		103.52		95.01		1	44.6614	41.6297	46.17	48.61	48.87	YLR334C
343H02	YJL070C	1	0.222066		103.04		94.08		1	44.4077	40.1944	48.54	50.57	39.71	YJL070C			Putative protein of unknown function with similarity to AMP deaminases; the authentic, non-tagged protein is detected in highly purified mitochondria in high-throughput studies; YJL070C is a non-essential gene
345A05	YBR137W	1	0.222249		106.53		97.47		1	43.1838	40.1944	45.58	48.13	48.87	YBR137W			Protein of unknown function; localized to the cytoplasm; binds to Replication Protein A (RPA); also interacts with Sgt2p; YBR137W is not an essential gene
315E06	YCL060C	1	0.222426		144.2		142.12		1	65.1779	62.7392	65.59	59.22	55.25	YCL060C
322H04	YPL030W	1	0.222475		97.1		87.67		1	43.1854	40.1944	52.34	53.16	22.37	YPL030W	TRM44		tRNA(Ser) Um(44) 2'-O-methyltransferase; involved in maintaining levels of the tRNA-Ser species tS(CGA) and tS(UGA); conserved among metazoans and fungi but there does not appear to be a homolog in plants; TRM44 is a non-essential gene
326H09	YDR254W	1	0.222631		118.03		109.07		1	48.3493	45.2132	64.67	69.46	60.73	YDR254W	CHL4	CTF17 MCM17	Outer kinetochore protein required for chromosome stability; involved in new kinetochore assembly and sister chromatid cohesion; peripheral component of the Ctf19 kinetochore subcomplex that interacts with Ctf19p, Ctf3p, Iml3p and Mif2p
318E01	YOR195W	2	0.222694	0.0513039	116.95	4.24264	111.915	3.66988	1	50.271	46.765	51.53	53.81	50.7	YOR195W	SLK19		Kinetochore-associated protein required for normal segregation of chromosomes in meiosis and mitosis; component of the FEAR regulatory network, which promotes Cdc14p release from the nucleolus during anaphase; potential Cdc28p substrate
343H03	YJL078C	1	0.222809		99.62		91		1	42.6283	38.7924	47.9	49.68	47.05	YJL078C	PRY3		Protein of unknown function
338E07	YIL052C	3	0.222849	0.0333293	94.8033	3.76927	90.0133	4.74542	1	40.5105	36.6176	32.77	32.87	28.77	YIL052C	RPL34B	L34B	Protein component of the large (60S) ribosomal subunit, nearly identical to Rpl34Ap and has similarity to rat L34 ribosomal protein
336D01	YJR019C	1	0.22287		96.17		87.67		1	43.1552	40.1944	49.32	50.5	47.94	YJR019C	TES1	PTE1	Peroxisomal acyl-CoA thioesterase likely to be involved in fatty acid oxidation rather than fatty acid synthesis; conserved protein also found in human peroxisomes; TES1 mRNA levels increase during growth on fatty acids
346H05	YGL151W	1	0.222885		92.83		85.43		1	38.6405	35.3006	52.95	54.71	50.7	YGL151W	NUT1	MED5	Component of the RNA polymerase II mediator complex, which is required for transcriptional activation and also has a role in basal transcription
347E11	YER162C	1	0.223473		109.24		100.01		1	45.823	43.0989	53.4	55.27	53.43	YER162C	RAD4		Protein that recognizes and binds damaged DNA (with Rad23p) during nucleotide excision repair; subunit of Nuclear Excision Repair Factor 2 (NEF2); also involved, with Rad23p, in turnover of ubiquitylated proteins
343B03	YML038C	1	0.224739		96.47		88.15		1	43.7114	40.1944	47.27	50.2	47.94	YML038C	YMD8		Putative nucleotide sugar transporter, has similarity to Vrg4p
321B08	YDR162C	1	0.225563		75.93		69.33		1	41.8874	38.2408	42.92	44.45	33.33	YDR162C	NBP2		Protein involved in the HOG (high osmolarity glycerol) pathway, negatively regulates Hog1p by recruitment of phosphatase Ptc1p the Pbs2p-Hog1p complex, found in the nucleus and cytoplasm, contains an SH3 domain that binds Pbs2p
330H06	YML107C	1	0.225946		100.43		91.21		1	39.4615	36.6176	49.35	49.39	48.87	YML107C	PML39		Protein required for nuclear retention of unspliced pre-mRNAs along with Mlp1p and Pml1p; anchored to nuclear pore complex via Mlp1p and Mlp2p; found with the subset of nuclear pores farthest from the nucleolus; may interact with ribosomes
302H03	YLR113W	1	0.226712		110.25		101.54		1	42.9004	39.6296	49.13	52	43.4	YLR113W	HOG1	SSK3	Mitogen-activated protein kinase involved in osmoregulation via three independent osmosensors; mediates the recruitment and activation of RNA Pol II at Hot1p-dependent promoters; localization regulated by Ptp2p and Ptp3p
322G11	YPL037C	1	0.227382		99.33		90.84		1	41.8655	38.7924	45.31	47.24	47.94	YPL037C	EGD1		Subunit beta1 of the nascent polypeptide-associated complex (NAC) involved in protein targeting, associated with cytoplasmic ribosomes; enhances DNA binding of the Gal4p activator; homolog of human BTF3b
333E03	YLR426W	1	0.22753		98.97		89.15		1	45.8139	42.5071	48	50.44	43.4	YLR426W			Putative protein of unknown function; the authentic, non-tagged protein is detected in highly purified mitochondria in high-throughput studies; proposed to be involved in resistance to mechlorethamine and streptozotocin
332D05	YJL066C	1	0.227609		102.75		93.8		1	42.8849	39.6296	54.88	56.12	53.43	YJL066C	MPM1		Mitochondrial membrane protein of unknown function, contains no hydrophobic stretches
344C09	YHR171W	1	0.227668		90.96		81.29		1	41.7566	38.7924	48.32	50.17	42.48	YHR171W	ATG7	CVT2 APG7 APG11	Autophagy-related protein and dual specificity member of the E1 family of ubiquitin-activating enzymes; mediates the conjugation of Atg12p with Atg5p and Atg8p with phosphatidylethanolamine, required steps in autophagosome formation
343G10	YHR146W	1	0.227689		104.34		97.08		1	43.1652	39.6296	50.14	52.99	56.19	YHR146W	CRP1		Protein that binds to cruciform DNA structures
322H06	YPL025C	1	0.228227		104.35		93.8		1	44.9258	40.1944	55.76	56.29	49.78	YPL025C
347D08	YER139C	1	0.22825		124.46		112.11		1	45.3042	41.6297	51.87	55.34	47.94	YER139C	RTR1		CTD phosphatase; dephosphorylates S5-P in the C-terminal domain of Rpo21p; has a cysteine-rich motif required for function and conserved in eukaryotes; shuttles between the nucleus and cytoplasm
311B06	YDR369C	2	0.228476	0.0511755	143.565	25.5902	137.23	30.3632	6.8	59.0062	54.0153	80.73	71.8	58.91	YDR369C	XRS2		Protein required for DNA repair; component of the Mre11 complex, which is involved in double strand breaks, meiotic recombination, telomere maintenance, and checkpoint signaling
328G07	YIL009C-A	2	0.228496	0.0289677	119.815	0.558614	110.915	0.403051	6.4	48.1018	42.5071	59.66	61.69	53.43	YIL009C-A	EST3		Component of the telomerase holoenzyme, involved in telomere replication
332E07	YJL048C	1	0.228534		105.56		96.14		1	43.4889	40.1944	47.36	50.63	48.87	YJL048C	UBX6	CUI2	UBX (ubiquitin regulatory X) domain-containing protein that interacts with Cdc48p, transcription is repressed when cells are grown in media containing inositol and choline
307A02	YOR339C	1	0.228547		102.19		92.03		4	53.8721	50.3031	54.36	54.57	51.6	YOR339C	UBC11		Ubiquitin-conjugating enzyme most similar in sequence to Xenopus ubiquitin-conjugating enzyme E2-C, but not a true functional homolog of this E2; unlike E2-C, not required for the degradation of mitotic cyclin Clb2
307A08	YOR347C	1	0.229588		100.26		89.97		1	43.7344	40.1944	53.43	53.67	47.94	YOR347C	PYK2		Pyruvate kinase that appears to be modulated by phosphorylation; PYK2 transcription is repressed by glucose, and Pyk2p may be active under low glycolytic flux
345H02	YDL095W	1	0.229845		97.49		90.42		1	43.1608	39.6296	47.17	50.11	47.05	YDL095W	PMT1		Protein O-mannosyltransferase, transfers mannose from dolichyl phosphate-D-mannose to protein Ser/Thr residues; 1 of 7 related proteins involved in O-glycosylation which is essential for cell wall rigidity; involved in ER quality control
330G11	YML101C	1	0.230174		101.12		91.39		1	41.4469	38.2408	48.42	51.87	48.87	YML101C	CUE4		Protein of unknown function; has a CUE domain that binds ubiquitin, which may facilitate intramolecular monoubiquitination
332E11	YJL043W	1	0.230259		105.24		95.88		1	43.5687	40.1944	55.94	58.38	53.43	YJL043W			Putative protein of unknown function; YJL043W is a non-essential gene
325E04	YGL059W	1	0.230581		101.77		90.85		1	44.457	41.0516	50.53	52.44	45.21	YGL059W	PKP2		Mitochondrial protein kinase that negatively regulates activity of the pyruvate dehydrogenase complex by phosphorylating the ser-133 residue of the Pda1p subunit; acts in concert with kinase Pkp1p and phosphatases Ptc5p and Ptc6p
347B10	YER111C	1	0.230618		93		83.73		1	67.1361	66.2383	57.29	58.78	54.36	YER111C	SWI4	ART1	DNA binding component of the SBF complex (Swi4p-Swi6p), a transcriptional activator that in concert with MBF (Mbp1-Swi6p) regulates late G1-specific transcription of targets including cyclins and genes required for DNA synthesis and repair
343B12	YMR137C	1	0.230791		98.51		90.05		1	44.8034	41.6297	46.02	48.35	44.3	YMR137C	PSO2	SNM1	Nuclease required for a post-incision step in the repair of DNA single and double-strand breaks that result from interstrand crosslinks produced by a variety of mono- and bi-functional psoralen derivatives; induced by UV-irradiation
308D02	YPL241C	2	0.230985	0.0708889	119.065	3.03349	110.16	5.61443	1	48.2431	43.9967	50.83	55.48	56.19	YPL241C	CIN2		GTPase-activating protein (GAP) for Cin4p; tubulin folding factor C involved in beta-tubulin (Tub2p) folding; mutants display increased chromosome loss and benomyl sensitivity; deletion complemented by human GAP, retinitis pigmentosa 2
336A10	YCR086W	1	0.231274		114.33		102.41		1	46.0747	41.6297	60.68	62.51	52.51	YCR086W	CSM1		Nucleolar protein that forms a complex with Lrs4p and then Mam1p at kinetochores during meiosis I to mediate accurate homolog segregation; required for condensin recruitment to the replication fork barrier site and rDNA repeat segregation
330G10	YML100W-A	1	0.231332		105.12		96.12		1	42.8111	39.6296	49.29	51.23	47.94	YML100W-A			Putative protein of unknown function; identified by gene-trapping, microarray-based expression analysis, and genome-wide homology searching
330H10	YML111W	1	0.231468		105.94		96.74		1	41.8913	38.7924	48.67	50.44	50.7	YML111W	BUL2		Component of the Rsp5p E3-ubiquitin ligase complex, involved in intracellular amino acid permease sorting, functions in heat shock element mediated gene expression, essential for growth in stress conditions, functional homolog of BUL1
330G12	YML102C-A	3	0.231842	0.0364466	113.623	9.64413	105.837	9.57681	1	46.4538	43.9967	52	55.23	53.43	YML102C-A
346G10	YGL141W	1	0.232069		107.07		99.48		1	44.6574	41.6297	52.27	53.84	51.6	YGL141W	HUL5		Multiubiquitin chain assembly factor (E4); proteasome processivity factor that elongates polyUb chains on substrates, opposing Ubp6p, a branched polyubiquitin protease; required for retrograde transport of misfolded proteins during ERAD
307A04	YOR343C	1	0.232181		99.71		89.58		1	42.4454	38.2408	54.4	54.33	49.78	YOR343C
336A04	YCR076C	1	0.232511		98.08		89.14		1	48.1121	43.9967	58.52	57.65	50.7	YCR076C			Putative protein of unknown function; YCR076C is not an essential gene
304C03	YMR179W	1	0.23254		136.44		131.65		6	53.4285	49.647	64.26	56.12	51.61	YMR179W	SPT21		Protein with a role in transcriptional silencing; required for normal transcription at several loci including HTA2-HTB2 and HHF2-HHT2, but not required at the other histone loci; functionally related to Spt10p
301E07	YAR018C	2	0.232575	0.0625773	123.83	17.112	117.17	17.4938	1	50.2702	46.1401	56.12	59.7	56.19	YAR018C	KIN3	NPK1 FUN52	Nonessential protein kinase with unknown cellular role
332D08	YJL062W	1	0.232683		118.48		107.92		7.5	50.3745	46.1401	60.89	65.18	58.93	YJL062W	LAS21	GPI7	Integral plasma membrane protein involved in the synthesis of the glycosylphosphatidylinositol (GPI) core structure; mutations affect cell wall integrity
304E05	YMR219W	3	0.232764	0.0671222	108.87	2.26872	100.547	1.61686	1	43.6168	39.6296	51.9	56.12	47.94	YMR219W	ESC1		Protein localized to the nuclear periphery, involved in telomeric silencing; interacts with PAD4-domain of Sir4p
332B03	YJL116C	1	0.232839		103.42		92.7		1	42.8567	40.1944	52.41	54.78	44.3	YJL116C	NCA3		Protein that functions with Nca2p to regulate mitochondrial expression of subunits 6 (Atp6p) and 8 (Atp8p ) of the Fo-F1 ATP synthase; member of the SUN family; expression induced in cells treated with the mycotoxin patulin
343A11	YLR394W	1	0.233338		101.46		93.69		1	44.6569	41.6297	45.15	47.71	48.87	YLR394W	CST9	ZIP3	SUMO E3 ligase; required for synaptonemal complex formation; localizes to synapsis initiation sites on meiotic chromosomes; potential Cdc28p substrate
330H07	YML108W	1	0.233488		97.06		87.98		1	40.1565	37.4233	46.95	48.9	45.21	YML108W			Putative protein of unknown function whose structure defines a new subfamily of the split beta-alpha-beta sandwiches; green fluorescent protein (GFP)-fusion protein localizes to the cytoplasm and nucleus; YML108W is not an essential gene
315C04	YCL016C	1	0.234126		157.85		149.61		4.5	58.65	54.7093	80.58	86.17	43.4	YCL016C	DCC1		Subunit of a complex with Ctf8p and Ctf18p that shares some components with Replication Factor C, required for sister chromatid cohesion and telomere length maintenance
305F05	YNL271C	4	0.234222	0.0201539	114.823	5.48826	106.035	5.39821	1	52.8662	47.3955	48.03	48.56	37.9	YNL271C	BNI1	PPF3 SHE5	Formin, nucleates the formation of linear actin filaments, involved in cell processes such as budding and mitotic spindle orientation which require the formation of polarized actin cables, functionally redundant with BNR1
301G05	YLL015W	2	0.234256	0.0226688	104.98	18.7242	99.19	18.2009	1	42.9951	40.1944	52.95	54.54	39.71	YLL015W	BPT1		ABC type transmembrane transporter of MRP/CFTR family, found in vacuolar membrane, involved in the transport of unconjugated bilirubin and in heavy metal detoxification via glutathione conjugates, along with Ycf1p
320D06	YLR235C	3	0.234349	0.123021	120.707	32.943	111.27	31.3197	16.4	47.8529	43.0989	76.14	64.79	51.61	YLR235C
325B12	YGL005C	1	0.234492		96.76		92.42		1	42.5791	39.6296	58.41	57.33	54.36	YGL005C	COG7	COD5	Component of the conserved oligomeric Golgi complex (Cog1p through Cog8p), a cytosolic tethering complex that functions in protein trafficking to mediate fusion of transport vesicles to Golgi compartments
325F11	YNL239W	1	0.234955		97.92		92.49		1	43.9259	40.1944	48.42	48.64	42.48	YNL239W	LAP3	YCP1 GAL6 BLH1	Cysteine aminopeptidase with homocysteine-thiolactonase activity; protects cells against homocysteine toxicity; has bleomycin hydrolase activity in vitro; transcription is regulated by galactose via Gal4p; orthologous to human BLMH
343H06	YJL105W	1	0.234981		97.29		89.24		1	43.5681	40.1944	47.4	49.32	52.51	YJL105W	SET4		Protein of unknown function, contains a SET domain
304B11	YMR175W	1	0.235374		107.95		97.9		1	44.0348	40.1944	44.79	47.46	43.4	YMR175W	SIP18		Phospholipid-binding hydrophilin with a role in dessication resistance; expression is induced by osmotic stress
335C05	YDR014W	1	0.235415		119.08		111.41		1	43.7306	40.1944	70.36	60.63	42.47	YDR014W	RAD61	WPL1	Subunit of a complex (Scc3p, Pds5p, Rad61p) that inhibits sister chromatid cohesion; inhibited by Eco1p-acetylated cohesin subunits Smc3p and Mcd1p; related to the human Wapl protein that controls the association of cohesin with chromatin
332H08	YOL141W	1	0.235506		102.32		94.49		1	44.654	41.0516	47.49	50.3	46.11	YOL141W	PPM2	TYW4	AdoMet-dependent tRNA methyltransferase also involved in methoxycarbonylation; required for the synthesis of wybutosine (yW), a modified guanosine found at the 3'-position adjacent to the anticodon of phe-tRNA; similarity to Ppm1p
343E04	YMR191W	1	0.235558		103.6		94.57		1	44.2671	41.0516	50.77	54.08	46.11	YMR191W	SPG5		Protein required for survival at high temperature during stationary phase; not required for growth on nonfermentable carbon sources
307E10	YOL028C	1	0.235564		100.08		90.79		1	46.2633	43.0989	51.03	51.94	47.05	YOL028C	YAP7		Putative basic leucine zipper (bZIP) transcription factor
343F05	YOR269W	1	0.235569		104.51		97.15		1	49.3319	44.6022	53.57	55.55	53.43	YOR269W	PAC1		Protein involved in nuclear migration, part of the dynein/dynactin pathway; targets dynein to microtubule tips, which is necessary for sliding of microtubules along bud cortex; synthetic lethal with bni1; homolog of human LIS1
330G04	YML095C	2	0.235627	0.0389349	107.09	2.48902	98.18	1.23037	1	43.9469	40.1944	58.93	61.83	51.6	YML095C	RAD10		Single-stranded DNA endonuclease (with Rad1p), cleaves single-stranded DNA during nucleotide excision repair and double-strand break repair; subunit of Nucleotide Excision Repair Factor 1 (NEF1); homolog of human ERCC1 protein
307C04	YOR375C	1	0.235658		102.51		92.84		1	42.1691	38.7924	69.93	56.47	51.61	YOR375C	GDH1	DHE4 URE1 GDH-A GDHA	NADP(+)-dependent glutamate dehydrogenase, synthesizes glutamate from ammonia and alpha-ketoglutarate; rate of alpha-ketoglutarate utilization differs from Gdh3p; expression regulated by nitrogen and carbon sources
329F08	YOL104C	1	0.236019		96.31		87.13		1	45.1898	41.6297	51.03	52.85	48.87	YOL104C	NDJ1	TAM1	Meiosis-specific telomere protein, required for bouquet formation, effective homolog pairing, ordered cross-over distribution, sister chromatid cohesion at meiotic telomeres, chromosomal segregation and telomere-led rapid prophase movement
303E04	YML006C	1	0.236686		106.29		99.29		1	40.486	37.4233	52.17	56.15	56.19	YML006C	GIS4		CAAX box containing protein of unknown function, proposed to be involved in the RAS/cAMP signaling pathway
327D02	YDR310C	1	0.236897		99.49		91.49		1	49.6818	46.1401	59.15	60.48	50.7	YDR310C	SUM1		Transcriptional repressor required for mitotic repression of middle sporulation-specific genes; also acts as general replication initiation factor; involved in telomere maintenance, chromatin silencing; regulated by pachytene checkpoint
343G12	YJL042W	1	0.237136		100.77		92.39		1	42.0348	38.7924	43.97	46.45	47.94	YJL042W	MHP1		Microtubule-associated protein involved in assembly and stabilization of microtubules; overproduction results in cell cycle arrest at G2 phase; similar to Drosophila protein MAP and to mammalian MAP4 proteins
318B07	YOR135C	1	0.237259		89.97		84.5		1	44.0065	41.0516	52.24	54.08	53.43	YOR135C
303C11	YML028W	1	0.237422		126.22		118.34		1	52.4474	48.9966	46.83	49.22	36.06	YML028W	TSA1	cTPxI ZRG14 TPX1	Thioredoxin peroxidase, acts as both a ribosome-associated and free cytoplasmic antioxidant; self-associates to form a high-molecular weight chaperone complex under oxidative stress; deletion results in mutator phenotype
332F05	YER031C	1	0.237438		95.59		86.93		1	45.6904	42.5071	52.82	56.43	52.51	YER031C	YPT31	YPT8	Rab family GTPase, very similar to Ypt32p; involved in the exocytic pathway; mediates intra-Golgi traffic or the budding of post-Golgi vesicles from the trans-Golgi
342H02	YCR075C	1	0.237456		98.24		88.18		1	42.3516	39.6296	48.32	50.3	49.78	YCR075C	ERS1		Protein with similarity to human cystinosin, which is a H(+)-driven transporter involved in L-cystine export from lysosomes and implicated in the disease cystinosis; contains seven transmembrane domains
346B01	YDR467C	1	0.237535		104.71		97.56		1	44.4655	41.0516	50.87	51.6	47.94	YDR467C
322H07	YPL023C	2	0.237588	0.0439212	99.425	6.54074	89.435	4.19314	1	44.3996	41.6297	59.51	59.59	57.08	YPL023C	MET12		Protein with methylenetetrahydrofolate reductase (MTHFR) activity in vitro; null mutant has no phenotype and is prototrophic for methionine; MET13 encodes major isozyme of MTHFR
343A04	YLR246W	1	0.237745		99.11		90.4		1	43.1739	39.6296	48.67	51.57	51.6	YLR246W	ERF2		Subunit of a palmitoyltransferase, composed of Erf2p and Shr5p, that adds a palmitoyl lipid moiety to heterolipidated substrates such as Ras1p and Ras2p through a thioester linkage; mutants partially mislocalize Ras2p to the vacuole
339A12	YNL031C	1	0.237807		100.86		92.62		1	44.2409	41.0516	45.57	47.61	31.51	YNL031C	HHT2		Histone H3, core histone protein required for chromatin assembly, part of heterochromatin-mediated telomeric and HM silencing; one of two identical histone H3 proteins (see HHT1); regulated by acetylation, methylation, and phosphorylation
316G10	YKL053W	1	0.237838		122.11		114.83		1	57.4957	53.3272	59.15	61.53	51.6	YKL053W
335E09	YBR273C	1	0.237877		98.08		91.86		1	43.9433	39.6296	49.94	52.31	49.78	YBR273C	UBX7	CUI3	UBX (ubiquitin regulatory X) domain-containing protein that interacts with Cdc48p
301F02	YAR030C	1	0.237917		114.12		106.36		1	42.704	39.6296	51.23	54.99	42.48	YAR030C
333A11	YJR088C	1	0.237962		98.31		88.86		1	47.4865	43.9967	44.48	46.11	45.21	YJR088C	EMC2		Member of a transmembrane complex required for efficient folding of proteins in the ER; null mutant displays induction of the unfolded protein response
346G12	YGL146C	1	0.237987		100.6		92.56		1	43.1105	40.1944	49.22	50.67	48.87	YGL146C	RRT6		Putative protein of unknown function; non-essential gene identified in a screen for mutants with increased levels of rDNA transcription; contains two putative transmembrane spans, but no significant homology to other known proteins
332H10	YOL150C	1	0.238069		100.11		91.34		1	44.2362	40.1944	55.55	56.08	54.36	YOL150C
330H08	YML109W	3	0.238109	0.0707605	106.223	2.255	97.9233	2.01013	1	44.0432	39.6296	50.67	51.73	45.21	YML109W	ZDS2	CES4	Protein with a role in regulating Swe1p-dependent polarized growth; interacts with Cdc55p; interacts with silencing proteins at the telomere; implicated in the mitotic exit network through regulation of Cdc14p localization; paralog of Zds1p
332A05	YJL127C	1	0.238193		220.64		220.7		5.8	67.5501	66.2383	113.8	108.2	73.53	YJL127C	SPT10	SUD1 CRE1	Putative histone acetylase with a role in transcriptional silencing, sequence-specific activator of histone genes, binds specifically and cooperatively to pairs of UAS elements in core histone promoters, functions at or near the TATA box
345F05	YDL071C	1	0.238312		100.92		92.75		1	42.5987	38.7924	51.2	51.93	47.94	YDL071C
307F10	YOL044W	1	0.238314		102.44		92.94		1	47.8234	43.9967	48.45	51.33	36.99	YOL044W	PEX15	PAS21	Phosphorylated tail-anchored type II integral peroxisomal membrane protein required for peroxisome biogenesis, cells lacking Pex15p mislocalize peroxisomal matrix proteins to cytosol, overexpression results in impaired peroxisome assembly
305F04	YNL273W	2	0.238319	0.0174072	111.645	1.0253	103.82	1.75362	1	49.4719	46.1401	46.56	48.39	43.38	YNL273W	TOF1		Subunit of a replication-pausing checkpoint complex (Tof1p-Mrc1p-Csm3p) that acts at the stalled replication fork to promote sister chromatid cohesion after DNA damage, facilitating gap repair of damaged DNA; interacts with the MCM helicase
345H03	YDR438W	1	0.238324		101.01		93.81		1	44.2254	41.0516	44.94	48.13	47.94	YDR438W	THI74		Mitochondrial transporter repressible by thiamine
332F06	YER046W	1	0.238918		105.23		95.51		1	44.4714	41.0516	46.77	50.44	50.7	YER046W	SPO73		Meiosis-specific protein of unknown function, required for spore wall formation during sporulation; dispensible for both nuclear divisions during meiosis
342H05	YCR088W	1	0.238935		97.19		88.55		1	43.9152	41.0516	50.83	53.4	48.87	YCR088W	ABP1		Actin-binding protein of the cortical actin cytoskeleton, important for activation of the Arp2/3 complex that plays a key role actin in cytoskeleton organization
311A03	YDR345C	1	0.239244		105.2		96.84		1	42.8172	39.6296	49.52	51.53	51.6	YDR345C	HXT3		Low affinity glucose transporter of the major facilitator superfamily, expression is induced in low or high glucose conditions
346F03	YGL110C	1	0.239437		103.4		95.5		1	43.2145	40.1944	54.43	56.72	48.87	YGL110C	CUE3		Protein of unknown function; has a CUE domain that binds ubiquitin, which may facilitate intramolecular monoubiquitination
339E08	YNR049C	1	0.239452		99.89		90.41		1	47.3036	43.0989	48.93	52.81	26.94	YNR049C	MSO1		Probable component of the secretory vesicle docking complex, acts at a late step in secretion; shows genetic and physical interactions with Sec1p; required for prospore membrane formation during sporulation
325E06	YGL062W	1	0.239525		100.45		89.73		1	45.2086	42.5071	50.97	52.68	52.51	YGL062W	PYC1		Pyruvate carboxylase isoform, cytoplasmic enzyme that converts pyruvate to oxaloacetate; highly similar to isoform Pyc2p but differentially regulated; mutations in the human homolog are associated with lactic acidosis
339D08	YNR030W	1	0.239729		100.06		91.78		1	45.9319	43.0989	47.29	49.86	51.61	YNR030W	ALG12	ECM39	Alpha-1,6-mannosyltransferase localized to the ER; responsible for the addition of the alpha-1,6 mannose to dolichol-linked Man7GlcNAc2, acts in the dolichol pathway for N-glycosylation
332A02	YPR097W	1	0.240005		105.64		98.42		1	45.7823	41.6297	49.75	50.63	52.51	YPR097W			Protein that contains a Phox homology (PX) domain and binds phosphoinositides; the authentic, non-tagged protein is detected in highly purified mitochondria in high-throughput studies
346G11	YGL144C	1	0.240157		101.7		94.55		1	42.5689	39.6296	51.77	53.46	50.7	YGL144C	ROG1		Protein with putative serine active lipase domain
332A07	YJL124C	1	0.240797		98.25		91.18		1	45.4166	40.1944	56.15	56.43	53.43	YJL124C	LSM1	SPB8	Lsm (Like Sm) protein; forms heteroheptameric complex (with Lsm2p, Lsm3p, Lsm4p, Lsm5p, Lsm6p, and Lsm7p) involved in degradation of cytoplasmic mRNAs
343F03	YOR267C	1	0.240909		105.49		97.36		1	44.1088	41.0516	48.51	50.04	48.87	YOR267C	HRK1		Protein kinase implicated in activation of the plasma membrane H(+)-ATPase Pma1p in response to glucose metabolism; plays a role in ion homeostasis
346E01	YDR522C	1	0.241049		101.65		94.19		5.6	43.4218	40.1944	49.52	50.96	46.11	YDR522C	SPS2		Protein expressed during sporulation, redundant with Sps22p for organization of the beta-glucan layer of the spore wall; S. pombe ortholog is a spore wall component
307F03	YOL035C	1	0.241305		96.14		88.51		1	46.515	43.0989	49.82	51.17	47.95	YOL035C
340E10	YIL132C	1	0.241415		109.38		100.68		1	43.5631	38.7924	52.27	54.81	47.05	YIL132C	CSM2		Protein involved in a Rad51p-, Rad54p-dependent pathway for homologous recombination repair, required for accurate chromosome segregation during meiosis
303E12	YMR006C	1	0.241468		97.67		92.04		1	45.9081	42.5071	48.74	51.03	47.05	YMR006C	PLB2		Phospholipase B (lysophospholipase) involved in phospholipid metabolism; displays transacylase activity in vitro; overproduction confers resistance to lysophosphatidylcholine
347C06	YER119C-A	1	0.241488		109.53		99.06		1	43.8891	40.1944	50.27	52.82	42.48	YER119C-A
304B01	YMR126C	1	0.241503		110.24		100.7		1	43.5787	40.1944	48.06	51.6	47.94	YMR126C	DLT1		Protein of unknown function, mutant sensitive to 6-azauracil (6AU) and mycophenolic acid (MPA)
330G08	YML099C	1	0.241525		104.33		95.28		1	43.8896	40.1944	47.94	50.67	50.7	YML099C	ARG81	ARGRII ARGR2	Zinc-finger transcription factor of the Zn(2)-Cys(6) binuclear cluster domain type, involved in the regulation of arginine-responsive genes; acts with Arg80p and Arg82p
343B05	YML042W	1	0.241545		96.85		88.7		1	44.9335	41.6297	47.68	49.68	46.11	YML042W	CAT2	YCAT	Carnitine acetyl-CoA transferase present in both mitochondria and peroxisomes, transfers activated acetyl groups to carnitine to form acetylcarnitine which can be shuttled across membranes
330G09	YML100W	1	0.241813		103.27		93.49		1	43.4575	40.1944	56.08	59.18	42.48	YML100W	TSL1		Large subunit of trehalose 6-phosphate synthase (Tps1p)/phosphatase (Tps2p) complex, which converts uridine-5'-diphosphoglucose and glucose 6-phosphate to trehalose, similar to Tps3p and may share function; mutant has aneuploidy tolerance
332A04	YPR101W	1	0.242156		152.44		143.82		16.2	48.8433	45.2132	71.02	61.37	51.61	YPR101W	SNT309	NTC25	Member of the NineTeen Complex (NTC) that contains Prp19p and stabilizes U6 snRNA in catalytic forms of the spliceosome containing U2, U5, and U6 snRNAs; interacts physically and genetically with Prp19p
330E02	YMR306W	1	0.242268		100.63		92		1	41.6065	38.2408	48.96	51.73	47.05	YMR306W	FKS3		Protein involved in spore wall assembly, has similarity to 1,3-beta-D-glucan synthase catalytic subunits Fks1p and Gsc2p; the authentic, non-tagged protein is detected in highly purified mitochondria in high-throughput studies
330F03	YNL279W	1	0.242519		101.81		93.84		1	43.2881	40.1944	59.73	61.75	50.7	YNL279W	PRM1		Pheromone-regulated multispanning membrane protein involved in membrane fusion during mating; predicted to have 5 transmembrane segments and a coiled coil domain; localizes to the shmoo tip; regulated by Ste12p
345G01	YDL080C	1	0.243035		98.63		90.54		1	43.4675	40.1944	51.83	52.92	48.87	YDL080C	THI3	KID1	Probable alpha-ketoisocaproate decarboxylase, may have a role in catabolism of amino acids to long-chain and complex alcohols; required for expression of enzymes involved in thiamine biosynthesis
320A07	YLR381W	1	0.243336		108.32		101.49		1	44.0468	41.0516	48.67	49.26	43.4	YLR381W	CTF3	CHL3	Outer kinetochore protein that forms a complex with Mcm16p and Mcm22p; may bind the kinetochore to spindle microtubules
318H02	YOR248W	1	0.243342		102.62		93.53		1	45.8202	42.5071	49.48	52.44	56.19	YOR248W
345E07	YDL052C	1	0.243348		99.82		89.84		1	41.3328	38.2408	52.78	54.92	56.19	YDL052C	SLC1		1-acyl-sn-glycerol-3-phosphate acyltransferase, catalyzes the acylation of lysophosphatidic acid to form phosphatidic acid, a key intermediate in lipid metabolism; enzymatic activity detected in lipid particles and microsomes
332A01	YPR096C	1	0.243561		100.04		91.82		1	46.8046	43.9967	50.53	51.9	47.94	YPR096C			Protein of unknown function that may interact with ribosomes, based on co-purification experiments
336H11	YDL134C-A	1	0.243624		97.09		88.87		1	43.031	39.6296	49.26	51.23	50.7	YDL134C-A
330C10	YLR032W	3	0.243714	0.0527122	117.773	2.56711	109.397	3.45703	1	56.4392	51.9686	57.36	60.22	56.19	YLR032W	RAD5	REV2 SNM2	DNA helicase proposed to promote replication fork regression during postreplication repair by template switching; RING finger containing ubiquitin ligase; stimulates the synthesis of free and PCNA-bound polyubiquitin chains by Ubc13p-Mms2p
327D11	YDR320C	1	0.243739		88.46		79.61		5.8	57.8023	52.645	51.23	52.68	48.87	YDR320C	SWA2	BUD24 AUX1	Auxilin-like protein involved in vesicular transport; clathrin-binding protein required for uncoating of clathrin-coated vesicles
347A06	YGL166W	1	0.243768		105.47		95.01		1	42.7105	38.7924	47.33	49.48	48.87	YGL166W	CUP2	ACE1	Copper-binding transcription factor; activates transcription of the metallothionein genes CUP1-1 and CUP1-2 in response to elevated copper concentrations
347F07	YER175C	1	0.243771		103.71		93.9		1	46.6681	43.0989	49.16	51.36	47.94	YER175C	TMT1	TAM1	Trans-aconitate methyltransferase, cytosolic enzyme that catalyzes the methyl esterification of 3-isopropylmalate, an intermediate of the leucine biosynthetic pathway, and trans-aconitate, which inhibits the citric acid cycle
343H05	YJL101C	1	0.244122		104.52		94.91		1	43.2112	39.6296	43.34	45.92	27.86	YJL101C	GSH1		Gamma glutamylcysteine synthetase catalyzes the first step in glutathione (GSH) biosynthesis; expression induced by oxidants, cadmium, and mercury
303E09	YML001W	1	0.244347		105.71		98.74		1	44.0109	40.1944	47.81	52.04	52.51	YML001W	YPT7	VAM4 AST4	Rab family GTPase; GTP-binding protein of the rab family; required for homotypic fusion event in vacuole inheritance, for endosome-endosome fusion, similar to mammalian Rab7
314G07	YHR151C	2	0.244486	0.0132632	96.3	1.15966	89.645	1.78898	1	42.673	39.6296	43.79	47.17	39.71	YHR151C	MTC6		Protein of unknown function; mtc6 is synthetically sick with cdc13-1
303E01	YML009C	1	0.244499		105.64		98.98		1	43.6911	40.1944	51.5	53.77	51.6	YML009C	MRPL39	YmL39	Mitochondrial ribosomal protein of the large subunit
343D01	YGR295C	1	0.244581		101.9		92.46		1	51.0463	47.3955	52.64	53.16	47.94	YGR295C	COS6		Protein of unknown function, member of the DUP380 subfamily of conserved, often subtelomerically-encoded proteins
344E03	YML115C	2	0.245159	0.0180745	77.475	10.4015	72.36	13.633	7.3	44.2436	38.2408	47.81	49.16	41.54	YML115C	VAN1	VRG7 VRG8 LDB13	Component of the mannan polymerase I, which contains Van1p and Mnn9p and is involved in the first steps of mannan synthesis; mutants are vanadate-resistant
341G04	YDR058C	1	0.245398		101.91		94.68		1	44.1022	41.0516	49.39	52.37	46.11	YDR058C	TGL2		Triacylglycerol lipase that is localized to the mitochondria; has lipolytic activity towards triacylglycerols and diacylglycerols when expressed in E. coli
323A03	YPL008W	1	0.245428		127.24		119.56		1	51.4439	47.3955	65.67	67.55	43.38	YPL008W	CHL1	MCM12 LPA9 CTF1	Probable DNA helicase involved in sister-chromatid cohesion and genome integrity; interacts with ECO1 and CTF18; mutants are defective in silencing, rDNA recombination, aging and the heat shock response; FANCJ-like helicase family member
347G10	YMR053C	1	0.245528		104.95		95.14		1	47.7128	42.5071	49.26	51.36	44.3	YMR053C	STB2		Protein that interacts with Sin3p in a two-hybrid assay and is part of a large protein complex with Sin3p and Stb1p
340E04	YIL121W	1	0.245884		105.88		97.42		1	65.7528	63.5059	50.63	52.64	49.78	YIL121W	QDR2		Multidrug transporter of the major facilitator superfamily, required for resistance to quinidine, barban, cisplatin, and bleomycin; may have a role in potassium uptake
342E03	YAR002C-A	1	0.246056		101.63		91		1	42.7527	38.7924	54.4	58.12	32.42	YAR002C-A	ERP1		Protein that forms a heterotrimeric complex with Erp2p, Emp24p, and Erv25p; member, along with Emp24p and Erv25p, of the p24 family involved in ER to Golgi transport and localized to COPII-coated vesicles
311B03	YDR363W	1	0.246249		121.7		110.73		1	50.2341	45.2132	72.44	63.08	54.35	YDR363W	ESC2		Sumo-like domain protein; prevents accumulation of toxic intermediates during replication-associated recombinational repair; roles in silencing, lifespan, chromatid cohesion and the intra-S-phase DNA damage checkpoint; RENi family member
330H03	YML103C	3	0.246468	0.0754498	115.363	7.18549	106.907	6.87361	1	54.207	50.965	53.36	58.09	64.4	YML103C	NUP188		Subunit of the nuclear pore complex (NPC), involved in the structural organization of the complex and of the nuclear envelope, also involved in nuclear envelope permeability, interacts with Pom152p and Nic96p
330B01	YGR210C	1	0.246835		103.02		94.53		1	43.9686	41.0516	49.45	51	47.05	YGR210C			Putative protein of unknown function; green fluorescent protein (GFP)-fusion protein localizes to the cytoplasm
339D09	YNR031C	1	0.246968		103		95.2		1	44.2516	41.0516	46.92	49.46	32.42	YNR031C	SSK2		MAP kinase kinase kinase of the HOG1 mitogen-activated signaling pathway; interacts with Ssk1p, leading to autophosphorylation and activation of Ssk2p which phosphorylates Pbs2p; also mediates actin cytoskeleton recovery from osmotic stress
330C02	YLL030C	1	0.247009		98.94		89.67		1	45.3845	42.5071	50.73	54.02	52.51	YLL030C
340G08	YIL162W	1	0.247161		103.6		95.09		1	44.1578	40.1944	48.9	51.43	55.27	YIL162W	SUC2		Invertase, sucrose hydrolyzing enzyme; a secreted, glycosylated form is regulated by glucose repression, and an intracellular, nonglycosylated enzyme is produced constitutively
336G05	YDL113C	1	0.247274		98.74		89.87		1	43.6609	40.1944	50.47	53.05	47.05	YDL113C	ATG20	SNX42 CVT20	Sorting nexin family member required for the cytoplasm-to-vacuole targeting (Cvt) pathway and for endosomal sorting; has a Phox homology domain that binds phosphatidylinositol-3-phosphate; interacts with Snx4p; potential Cdc28p substrate
334E03	YJR118C	3	0.247285	0.0552266	84.05	10.2423	79.08	8.6997	9.9	46.002	41.0516	49.61	51.73	34.24	YJR118C	ILM1		Protein of unknown function; may be involved in mitochondrial DNA maintenance; required for slowed DNA synthesis-induced filamentous growth
336H10	YDL134C	1	0.247295		102.05		94.43		1	45.9002	43.0989	58.93	61.75	66.2	YDL134C	PPH21	PPH1	Catalytic subunit of protein phosphatase 2A (PP2A), functionally redundant with Pph22p; methylated at C terminus; forms alternate complexes with several regulatory subunits; involved in signal transduction and regulation of mitosis
323H12	YER039C-A	1	0.24731		95.48		86.75		1	43.5195	40.1944	44.6	47.84	22.37	YER039C-A			Putative protein of unknown function; YER039C-A is not an essential gene
343H10	YKR096W	1	0.247348		102.52		94.36		1	43.74	39.6296	45.06	47.52	47.94	YKR096W			Protein of unknown function that may interact with ribosomes, based on co-purification experiments; green fluorescent protein (GFP)-fusion protein localizes to the nucleus and cytoplasm; predicted to contain a PINc domain
341F02	YNL104C	1	0.247495		102.35		94.93		1	43.9909	41.0516	47.46	50.04	47.94	YNL104C	LEU4		Alpha-isopropylmalate synthase (2-isopropylmalate synthase); the main isozyme responsible for the first step in the leucine biosynthesis pathway
314E04	YHR110W	1	0.247529		91.98		83.75		1	42.7121	39.6296	48.48	51.94	48.87	YHR110W	ERP5		Protein with similarity to Emp24p and Erv25p, member of the p24 family involved in ER to Golgi transport
347E12	YER164W	1	0.24756		113.03		102.6		1	44.004	41.0516	46.05	48.06	47.05	YER164W	CHD1		Nucleosome remodeling factor that functions in regulation of transcription elongation; contains a chromo domain, a helicase domain and a DNA-binding domain; component of both the SAGA and SLIK complexes
345G08	YDL089W	1	0.247803		104.84		96.89		1	43.9571	40.1944	48.29	49.48	48.87	YDL089W	NUR1		Protein of unknown function; interacts with Csm1p, Lrs4p; required for rDNA repeat stability; null mutant causes increase in unequal sister-chromatid exchange; GFP-fusion protein localizes to the nuclear periphery, possible Cdc28p substrate
332D09	YJL060W	1	0.247806		104.45		95.81		1	45.4306	42.5071	50.93	53.64	51.6	YJL060W	BNA3		Kynurenine aminotransferase, catalyzes formation of kynurenic acid from kynurenine; potential Cdc28p substrate
321D09	YDR207C	1	0.247877		101.05		90.21		3.1	49.9649	47.3955	60.29	67.87	51.6	YDR207C	UME6	CAR80 NIM2 RIM16	Key transcriptional regulator of early meiotic genes, binds URS1 upstream regulatory sequence, couples metabolic responses to nutritional cues with initiation and progression of meiosis, forms complex with Ime1p, and also with Sin3p-Rpd3p
318H12	YOR280C	1	0.24823		106.59		96.92		1	44.173	41.0516	60.06	51.49	50.69	YOR280C	FSH3		Putative serine hydrolase; likely target of Cyc8p-Tup1p-Rfx1p transcriptional regulation; sequence is similar to S. cerevisiae Fsh1p and Fsh2p and the human candidate tumor suppressor OVCA2
327A03	YDR260C	1	0.248325		103.99		95.04		1	48.2406	45.2132	49.29	51	48.87	YDR260C	SWM1	APC13	Subunit of the anaphase-promoting complex, which is an E3 ubiquitin ligase that regulates the metaphase-anaphase transition and exit from mitosis; required for activation of the daughter-specific gene expression and spore wall maturation
321A03	YLR318W	1	0.248572		97.3		88.57		6.8	58.1607	53.3272	50.9	52.27	25.11	YLR318W	EST2	TERT	Reverse transcriptase subunit of the telomerase holoenzyme, essential for telomerase core catalytic activity, involved in other aspects of telomerase assembly and function; mutations in human homolog are associated with aplastic anemia
331C02	YMR111C	2	0.248598	0.06409	86.98	0.905097	79.56	0.296985	1	42.752	40.1944	42.68	45.49	45.21	YMR111C			Protein of unknown function; green fluorescent protein (GFP)-fusion protein localizes to the nucleus; YMR111C is not an essential gene
346H07	YGL153W	1	0.248675		106.14		98.48		1	45.1823	42.5071	53.26	55.8	54.36	YGL153W	PEX14		Peroxisomal membrane peroxin that is a central component of the peroxisomal protein import machinery; interacts with both PTS1 (Pex5p) and PTS2 (Pex7p), peroxisomal matrix protein signal recognition factors and membrane receptor Pex13p
343G07	YFR024C	1	0.248727		100.55		92.46		1	42.5353	39.6296	48.58	51.87	49.78	YFR024C
343E08	YNL142W	1	0.248901		101.74		93.49		1	42.9626	40.1944	50.57	52.82	51.6	YNL142W	MEP2		Ammonium permease involved in regulation of pseudohyphal growth; belongs to a ubiquitous family of cytoplasmic membrane proteins that transport only ammonium (NH4+); expression is under the nitrogen catabolite repression regulation
322A02	YGL241W	1	0.249107		98.25		92.69		1	42.5324	39.6296	53.5	54.4	58.93	YGL241W	KAP114		Karyopherin, responsible for nuclear import of Spt15p, Sua7p, histones H2A and H2B, and Nap1p; amino terminus shows similarity to those of other importins, particularly Cse1p; localization is primarily nuclear
325F07	YGL087C	1	0.249209		101.46		95.24		1	44.4564	41.0516	48.67	50.37	47.94	YGL087C	MMS2		Ubiquitin-conjugating enzyme variant involved in error-free postreplication repair; forms a heteromeric complex with Ubc13p, an active ubiquitin-conjugating enzyme; cooperates with chromatin-associated RING finger proteins, Rad18p and Rad5p
330H04	YML104C	1	0.249309		101.6		92.9		1	42.6801	39.6296	49.84	51.37	47.05	YML104C	MDM1		Intermediate filament protein, required for nuclear and mitochondrial transmission to daughter buds; contains a Phox homology (PX) domain and specifically binds phosphatidylinositol 3-phosphate (PtdIns-3-P)
347A10	YGL175C	1	0.249312		110.68		100.09		1	46.9337	43.0989	48.16	50.53	47.94	YGL175C	SAE2	COM1	Endonuclease that processes hairpin DNA structures with the MRX complex; involved in meiotic and mitotic double-strand break repair; phosphorylated in response to DNA damage and required for normal resistance to DNA-damaging agents
309A08	YPL147W	1	0.249428		110.25		101.01		1	47.1159	43.0989	51.1	52.71	55.27	YPL147W	PXA1	LPI1 PAL1 PAT2 SSH2	Subunit of a heterodimeric peroxisomal ATP-binding cassette transporter complex (Pxa1p-Pxa2p), required for import of long-chain fatty acids into peroxisomes; similarity to human adrenoleukodystrophy transporter and ALD-related proteins
332G04	YHR006W	1	0.249433		105.98		96.95		1	44.919	41.0516	53.88	55.48	53.43	YHR006W	STP2		Transcription factor, activated by proteolytic processing in response to signals from the SPS sensor system for external amino acids; activates transcription of amino acid permease genes
303F04	YMR010W	1	0.249451		118.55		112.3		1	44.6238	41.0516	46.05	49.09	41.54	YMR010W			Putative protein of unknown function; green fluorescent protein (GFP)-fusion protein localizes to the cytoplasm; YMR010W is not an essential gene; YMR010W mRNA is transcribed with ADI1
345H09	YDR446W	1	0.249677		100.49		91.93		1	43.9894	41.0516	45.34	48.06	47.05	YDR446W	ECM11		Non-essential protein apparently involved in meiosis, GFP fusion protein is present in discrete clusters in the nucleus throughout mitosis; may be involved in maintaining chromatin structure
339C11	YNR019W	1	0.249834		99.99		91.86		1	43.3819	40.1944	42.71	45.44	40.64	YNR019W	ARE2	SAT1	Acyl-CoA:sterol acyltransferase, isozyme of Are1p; endoplasmic reticulum enzyme that contributes the major sterol esterification activity in the presence of oxygen
331E03	YPR018W	2	0.249899	0.0157757	116.675	14.4038	108.225	11.0945	1	50.3737	47.3955	56.68	58.71	59.81	YPR018W	RLF2	CAC1	Largest subunit (p90) of the Chromatin Assembly Complex (CAF-1) with Cac2p and Msi1p that assembles newly synthesized histones onto recently replicated DNA; involved in the maintenance of transcriptionally silent chromatin
308D07	YPL232W	1	0.249967		102.49		92.98		1	43.5987	41.0516	45.49	48.74	52.51	YPL232W	SSO1		Plasma membrane t-SNARE involved in fusion of secretory vesicles at the plasma membrane and in vesicle fusion during sporulation; forms a complex with Sec9p that binds v-SNARE Snc2p; syntaxin homolog; functionally redundant with Sso2p
345F04	YDL070W	1	0.250217		103.67		94.38		1	41.8767	38.7924	52.34	53.7	47.94	YDL070W	BDF2		Protein involved in transcription initiation at TATA-containing promoters; associates with the basal transcription factor TFIID; contains two bromodomains; corresponds to the C-terminal region of mammalian TAF1; redundant with Bdf1p
327E01	YDR323C	1	0.25054		114.92		99.43		6.3	47.8261	43.9967	61.68	64.71	42.48	YDR323C	PEP7	VPL21 VPS19 VPT19 VAC1	Multivalent adaptor protein that facilitates vesicle-mediated vacuolar protein sorting by ensuring high-fidelity vesicle docking and fusion, which are essential for targeting of vesicles to the endosome; required for vacuole inheritance
336A08	YCR082W	1	0.250587		102.87		93.79		1	45.1797	41.6297	55.27	55.23	49.78	YCR082W	AHC2		Protein of unknown function, putative transcriptional regulator; proposed to be a Ada Histone acetyltransferase complex component; GFP tagged protein is localized to the cytoplasm and nucleus
332G11	YHR127W	1	0.250588		103.88		94.76		1	44.1695	41.0516	50.27	51.97	46.11	YHR127W		HSN1	Protein of unknown function; localizes to the nucleus; required for asymmetric localization of Kar9p during mitosis
342C05	YKL096W-A	1	0.250607		99.52		89.76		1	43.7953	41.0516	47.81	50.93	49.78	YKL096W-A	CWP2	LPR1 YKL097W-A	Covalently linked cell wall mannoprotein, major constituent of the cell wall; plays a role in stabilizing the cell wall; involved in low pH resistance; precursor is GPI-anchored
342G11	YCR069W	1	0.250919		100.63		91.21		1	48.7803	43.9967	52.82	55.3	49.78	YCR069W	CPR4	SCC3 YCR070W CYP4	Peptidyl-prolyl cis-trans isomerase (cyclophilin), catalyzes the cis-trans isomerization of peptide bonds N-terminal to proline residues; has a potential role in the secretory pathway
304B03	YMR164C	1	0.250939		107.55		98.62		1	43.864	39.6296	47.65	50.4	54.36	YMR164C	MSS11		Transcription factor involved in regulation of invasive growth and starch degradation; controls the activation of MUC1 and STA2 in response to nutritional signals
309D12	YBR173C	2	0.251068	0.0514456	110.41	1.42836	102.975	2.28395	5.4	50.2431	46.765	62.57	55.01	49.78	YBR173C	UMP1	RNS2	Short-lived chaperone required for correct maturation of the 20S proteasome; may inhibit premature dimerization of proteasome half-mers; degraded by proteasome upon completion of its assembly
337E06	YGR051C	1	0.251074		88.36		78.87		1	43.7385	41.0516	55.62	55.87	49.78	YGR051C
330B12	YHR191C	2	0.251229	0.0651605	129.875	25.3639	122.185	30.3278	4.8	63.0191	59.7343	76.5	83.6	57.09	YHR191C	CTF8		Subunit of a complex with Ctf18p that shares some subunits with Replication Factor C and is required for sister chromatid cohesion
303G10	YMR031C	1	0.251268		103.9		97.29		1	44.3418	41.0516	44.54	47.65	44.3	YMR031C	EIS1		Component of the eisosome that is required for proper eisosome assembly; similarity to Ykl050cp and Uso1p; the authentic, non-tagged protein is detected in a phosphorylated state in highly purified mitochondria in high-throughput studies
307B06	YOR359W	1	0.251371		94.8		86.58		1	42.2423	38.2408	52.58	54.22	51.6	YOR359W	VTS1		Post-transcriptional gene regulator, flap-structured DNA-binding and RNA-binding protein; shows genetic interactions with Vti1p, a v-SNARE involved in cis-Golgi membrane traffic; stimulates Dna2p endonuclease activity; contains a SAM domain
339E02	YNR039C	1	0.251827		103.93		95.18		1	43.8071	40.1944	46.44	50.13	37.9	YNR039C	ZRG17		Endoplasmic reticulum protein of unknown function, transcription is induced under conditions of zinc deficiency; mutant phenotype suggests a role in uptake of zinc
314F09	YHR134W	1	0.251856		106.52		94.79		1	47.1361	42.5071	58.74	63.54	61.64	YHR134W	WSS1		Sumoylated protein that localizes to a single spot on the nuclear periphery of mother cells but not daughters; interacts genetically with SMT3; UV-sensitive mutant phenotype and genetic interactions suggest a role in the DNA damage response
310D03	YDR073W	1	0.252113		99.21		91.02		1	42.4325	39.6296	46.05	48.93	53.43	YDR073W	SNF11		Subunit of the SWI/SNF chromatin remodeling complex involved in transcriptional regulation; interacts with a highly conserved 40-residue sequence of Snf2p
332E02	YJL055W	1	0.252145		108.52		99.27		1	44.6204	41.0516	60.82	53.68	59.82	YJL055W			Putative protein of unknown function, proposed to be involved in the metabolism of purine and pyrimidine base analogues; deletion mutants are sensitive to HAP and AHA; overexpression confers resistance to 5-FOA and 5-FU
326A06	YNL195C	1	0.252279		103.43		93.23		1	43.5115	41.0516	50.34	51.97	37.91	YNL195C			Putative protein of unknown function; shares a promoter with YNL194C; the authentic, non-tagged protein is detected in highly purified mitochondria in high-throughput studies
342C06	YKL115C	1	0.252451		100.16		90.54		1	43.1308	40.1944	46.92	49.58	48.87	YKL115C
315C05	YCL024W	1	0.252561		86.4		78.98		1	47.0106	43.9967	49.55	52.31	50.7	YCL024W	KCC4		Protein kinase of the bud neck involved in the septin checkpoint, associates with septin proteins, negatively regulates Swe1p by phosphorylation, shows structural homology to bud neck kinases Gin4p and Hsl1p
304A06	YMR153C-A	1	0.252888		110.04		99.91		1	46.5635	42.5071	45.12	47.49	50.7	YMR153C-A
330H02	YML102W	3	0.252967	0.0557086	111.607	7.44184	103.897	7.36797	1	48.1217	45.2132	51.53	53.36	54.36	YML102W	CAC2		Component of the chromatin assembly complex (with Rlf2p and Msi1p) that assembles newly synthesized histones onto recently replicated DNA, required for building functional kinetochores, conserved from yeast to humans
345E06	YDL050C	1	0.253026		105.04		96.9		1	46.134	42.5071	50.53	52.61	52.51	YDL050C
313A02	YGR141W	1	0.253327		97.95		90.42		1	45.1606	41.6297	57.08	58.78	58.93	YGR141W	VPS62		Vacuolar protein sorting (VPS) protein required for cytoplasm to vacuole targeting of proteins
332F02	YJL036W	1	0.253434		106.27		96.25		1	44.5093	41.0516	51.53	54.99	54.36	YJL036W	SNX4	CVT13 ATG24	Sorting nexin, involved in retrieval of late-Golgi SNAREs from post-Golgi endosomes to the trans-Golgi network and in cytoplasm to vacuole transport; contains a PX phosphoinositide-binding domain; forms complexes with Snx41p and with Atg20p
307D12	YOL013C	1	0.253838		103.09		93.75		1	45.7524	42.5071	48.93	50.44	45.21	YOL013C	HRD1	DER3	Ubiquitin-protein ligase required for endoplasmic reticulum-associated degradation (ERAD) of misfolded proteins; genetically linked to the unfolded protein response (UPR); regulated through association with Hrd3p; contains an H2 ring finger
322A04	YGL243W	1	0.253979		96.29		89.9		1	41.3881	38.2408	74.64	61.09	29.68	YGL243W	TAD1		tRNA-specific adenosine deaminase, deaminates adenosine-37 to inosine in tRNA-Ala
346D02	YDR508C	1	0.254096		108.95		100.53		1	43.4714	40.1944	50.11	52.27	47.94	YDR508C	GNP1		High-affinity glutamine permease, also transports Leu, Ser, Thr, Cys, Met and Asn; expression is fully dependent on Grr1p and modulated by the Ssy1p-Ptr3p-Ssy5p (SPS) sensor of extracellular amino acids
345E09	YDL059C	3	0.254118	0.0863727	112.217	7.43538	103.643	7.92826	1	49.3377	44.6022	49.94	52.44	52.51	YDL059C	RAD59		Protein involved in the repair of double-strand breaks in DNA during vegetative growth via recombination and single-strand annealing; anneals complementary single-stranded DNA; homologous to Rad52p
347A08	YGL168W	1	0.254222		67.69		58.72		8.9	47.2126	44.6022	47.14	47.05	33.33	YGL168W	HUR1		Protein of unknown function; reported null mutant phenotype of hydroxyurea sensitivity may be due to effects on overlapping PMR1 gene
339D01	YNR021W	1	0.254248		100.36		92.94		1	43.0282	39.6296	44.9	47.24	47.95	YNR021W			Putative protein of unknown function; green fluorescent protein (GFP)-fusion protein localizes to the endoplasmic reticulum; YNR021W is not an essential gene
332H03	YHR185C	1	0.254276		102.24		92.68		1	46.1552	42.5071	50.14	51.43	56.19	YHR185C	PFS1	ADY1	Sporulation protein required for prospore membrane formation at selected spindle poles, ensures functionality of all four spindle pole bodies during meiosis II; not required for meiotic recombination or meiotic chromosome segregation
336H06	YDL129W	1	0.254403		92.58		84.72		1	43.5731	39.6296	49.09	49.94	49.78	YDL129W			Putative protein of unknown function; green fluorescent protein (GFP)-fusion protein localizes to the cytoplasm and the nucleus; YDL129W is not an essential gene
318H08	YOR263C	1	0.254437		102.26		92.25		1	45.4393	41.6297	49.48	51.9	49.78	YOR263C
347H07	YJR044C	1	0.254646		106.89		97.51		1	42.7272	39.6296	45.37	47.94	47.94	YJR044C	VPS55		Late endosomal protein involved in late endosome to vacuole trafficking; functional homolog of human obesity receptor gene-related protein (OB-RGRP)
343F01	YOR265W	1	0.254666		102.75		94.43		1	41.8453	38.7924	47.4	49.88	34.24	YOR265W	RBL2		Protein involved in microtubule morphogenesis, required for protection from excess free beta-tubulin; proposed to be involved the folding of beta-tubulin; similar to mouse beta-tubulin cofactor A
312B06	YEL061C	2	0.254814	0.0942381	114.5	8.82469	108.325	7.62968	3.9	71.0078	69.8652	83.51	75.63	63.47	YEL061C	CIN8	SDS15 KSL2	Kinesin motor protein involved in mitotic spindle assembly and chromosome segregation
339A04	YNL013C	1	0.254816		100.88		93.44		1	41.091	38.7924	37.74	39.12	37.9	YNL013C
347E08	YER155C	1	0.254848		107.53		98.86		6.7	50.8275	43.9967	55.06	56.79	45.21	YER155C	BEM2	SUP9 IPL2 TSL1	Rho GTPase activating protein (RhoGAP) involved in the control of cytoskeleton organization and cellular morphogenesis; required for bud emergence
308C04	YPL256C	1	0.254861		117.3		108.24		1	50.3699	46.765	46.92	50.7	47.05	YPL256C	CLN2		G1 cyclin involved in regulation of the cell cycle; activates Cdc28p kinase to promote the G1 to S phase transition; late G1 specific expression depends on transcription factor complexes, MBF (Swi6p-Mbp1p) and SBF (Swi6p-Swi4p)
345C09	YDL012C	1	0.254941		101.55		93.1		1	44.7505	41.0516	48.42	50.8	47.05	YDL012C			Tail-anchored plasma membrane protein containing a conserved CYSTM module, possibly involved in response to stress; may contribute to non-homologous end-joining (NHEJ) based on ydl012c htz1 double null phenotype
315F04	YCR007C	1	0.254973		99.63		91.42		1	43.957	41.0516	47.49	49.88	45.21	YCR007C			Putative integral membrane protein, member of DUP240 gene family; YCR007C is not an essential gene
332F07	YER063W	1	0.255012		106.79		97.18		1	45.5979	42.5071	52.51	54.88	49.78	YER063W	THO1		Conserved nuclear RNA-binding protein; specifically binds to transcribed chromatin in a THO- and RNA-dependent manner, genetically interacts with shuttling hnRNP NAB2; overproduction suppresses transcriptional defect caused by hpr1 mutation
346F09	YGL124C	1	0.255259		101.35		93.61		1	38.7266	36.6176	49.03	51.47	47.94	YGL124C	MON1	AUT12	Protein required for fusion of cvt-vesicles and autophagosomes with the vacuole; associates, as a complex with Ccz1p, with a perivacuolar compartment; potential Cdc28p substrate
341F01	YNL100W	1	0.255393		102.21		94.46		1	45.4765	41.6297	46.39	48.32	45.21	YNL100W	AIM37		Putative protein of unknown function; non-tagged protein is detected in purified mitochondria; null mutant is viable and displays reduced respiratory growth and reduced frequency of mitochondrial genome loss
304B10	YMR174C	1	0.255398		107.79		97.78		1	42.2404	38.7924	45.95	49.52	52.51	YMR174C	PAI3	IA3	Cytoplasmic proteinase A (Pep4p) inhibitor, dependent on Pbs2p and Hog1p protein kinases for osmotic induction; intrinsically unstructured, N-terminal half becomes ordered in the active site of proteinase A upon contact
330G06	YML096W	1	0.255449		105.25		96.03		1	43.3007	40.1944	46.36	49.61	49.78	YML096W			Putative protein of unknown function with similarity to asparagine synthetases; green fluorescent protein (GFP)-fusion protein localizes to the cytoplasm; YML096W is not an essential gene and partially overlaps the verified gene RAD10
343F06	YOR270C	2	0.255462	0.075902	97.13	3.66281	86.695	3.04763	3.4	44.9991	41.6297	53.74	58.38	57.98	YOR270C	VPH1		Subunit a of vacuolar-ATPase V0 domain, one of two isoforms (Vph1p and Stv1p); Vph1p is located in V-ATPase complexes of the vacuole while Stv1p is located in V-ATPase complexes of the Golgi and endosomes
343F02	YOR266W	1	0.25559		101.51		92.61		1	43.657	40.1944	50.11	53.02	53.43	YOR266W	PNT1		Mitochondrial integral inner membrane protein involved in membrane insertion of C-terminus of Cox2p, interacts genetically and physically with Cox18p; deletion mutant sensitive to the anti-Pneumocystis carinii drug pentamidine
304A12	YMR161W	1	0.255681		103.42		94.36		1	43.9218	41.0516	46.92	48.61	52.51	YMR161W	HLJ1		Co-chaperone for Hsp40p, anchored in the ER membrane; with its homolog Ydj1p promotes ER-associated protein degradation (ERAD) of integral membrane substrates; similar to E. coli DnaJ
308B03	YPL272C	1	0.255687		103.59		95.23		1	43.2381	40.1944	47.49	51.16	42.48	YPL272C			Putative protein of unknown function; gene expression induced in response to ketoconazole; YPL272C is not an essential gene
318B05	YOR134W	1	0.255704		87.14		81.03		1	43.8153	40.1944	41.59	45.32	51.61	YOR134W	BAG7		Rho GTPase activating protein (RhoGAP), stimulates the intrinsic GTPase activity of Rho1p, which plays a role in actin cytoskeleton organization and control of cell wall synthesis; structurally and functionally related to Sac7p
339A06	YNL020C	1	0.255961		99.77		91.67		1	42.3429	39.6296	41.94	44.74	37.9	YNL020C	ARK1		Serine/threonine protein kinase involved in regulation of the cortical actin cytoskeleton; involved in control of endocytosis
335E10	YBR274W	1	0.255999		97.4		90.62		1	44.9557	41.0516	50.63	53.05	52.51	YBR274W	CHK1		Serine/threonine kinase and DNA damage checkpoint effector, mediates cell cycle arrest via phosphorylation of Pds1p; phosphorylated by checkpoint signal transducer Mec1p; homolog of S. pombe and mammalian Chk1 checkpoint kinase
310H11	YDR146C	1	0.256143		102.57		91.23		1	46.8212	43.9967	60.82	51.51	18.72	YDR146C	SWI5		Transcription factor that activates transcription of genes expressed at the M/G1 phase boundary and in G1 phase; localization to the nucleus occurs during G1 and appears to be regulated by phosphorylation by Cdc28p kinase
322H03	YPL032C	1	0.256417		97.53		88.19		1	45.6908	42.5071	64.36	66.04	47.05	YPL032C	SVL3		Protein of unknown function, mutant phenotype suggests a potential role in vacuolar function; green fluorescent protein (GFP)-fusion protein localizes to the cell periphery, cytoplasm, bud, and bud neck
324G10	YBL051C	1	0.256459		98.53		92.73		1	#N/A	#N/A	52.95	57.29	54.36	YBL051C	PIN4	MDT1	Protein involved in G2/M phase progression and response to DNA damage, interacts with Rad53p; contains an RNA recognition motif, a nuclear localization signal, and several SQ/TQ cluster domains; hyperphosphorylated in response to DNA damage
321B06	YDR159W	2	0.256496	0.0958128	104.275	5.77706	94.85	3.40825	3.9	57.3552	53.3272	42.77	41.63	25.11	YDR159W	SAC3	LEP1	Nuclear pore-associated protein, required for biogenesis of the small ribosomal subunit; forms a complex with Thp1p that is involved in transcription and in mRNA export from the nucleus
318H10	YOR277C	1	0.256507		106.45		96.32		1	46.7098	42.5071	52.92	55.23	57.08	YOR277C
308C11	YPL246C	1	0.256681		100.25		92.98		1	42.9891	39.6296	52.2	43.9	17.81	YPL246C	RBD2		Possible rhomboid protease, has similarity to eukaryotic rhomboid proteases including Pcp1p
311C10	YDR389W	1	0.256795		95.69		85.93		1	#N/A	#N/A	43.7	48.64	48.87	YDR389W	SAC7		GTPase activating protein (GAP) for Rho1p, involved in signaling to the actin cytoskeleton, null mutations suppress tor2 mutations and temperature sensitive mutations in actin; potential Cdc28p substrate
306E05	YOR083W	4	0.256909	0.0679157	83.72	3.85095	77.8325	3.11231	1	36.006	32.2693	33.61	32.83	27.86	YOR083W	WHI5		Repressor of G1 transcription that binds to SCB binding factor (SBF) at SCB target promoters in early G1; phosphorylation of Whi5p by the CDK, Cln3p/Cdc28p relieves repression and promoter binding by Whi5; periodically expressed in G1
307A05	YOR344C	1	0.257428		97.28		87.14		1	42.5064	38.7924	51.87	53.16	52.51	YOR344C	TYE7	SGC1	Serine-rich protein that contains a basic-helix-loop-helix (bHLH) DNA binding motif; binds E-boxes of glycolytic genes and contributes to their activation; may function as a transcriptional activator in Ty1-mediated gene expression
321A04	YLR319C	1	0.25758		75.74		70.12		1	47.6213	43.9967	54.81	57.91	48.87	YLR319C	BUD6	AIP3	Actin- and formin-interacting protein, involved in actin cable nucleation and polarized cell growth; isolated as bipolar budding mutant; potential Cdc28p substrate
318A08	YOR121C	1	0.257703		90.48		84.31		1	45.4039	41.6297	51.53	52.41	50.7	YOR121C
306A01	YOR019W	1	0.257724		102.74		96.94		1	42.792	39.6296	49.18	48.28	37.9	YOR019W			Protein of unknown function that may interact with ribosomes, based on co-purification experiments
310F07	YDR111C	1	0.257775		91.37		84.51		1	43.5005	41.0516	49.84	53.16	46.11	YDR111C	ALT2		Putative alanine transaminase (glutamic pyruvic transaminase)
345G07	YDL088C	1	0.257838		97.59		89.44		1	42.382	38.7924	45.31	47.14	47.05	YDL088C	ASM4	NUP59	Nuclear pore complex subunit, part of a subcomplex also containing Nup53p, Nup170p, and Pse1p
332A11	YJL121C	1	0.257967		109.07		99.83		1	43.134	39.6296	64.05	67.35	64.4	YJL121C	RPE1	EPI1 POS18	D-ribulose-5-phosphate 3-epimerase, catalyzes a reaction in the non-oxidative part of the pentose-phosphate pathway; mutants are sensitive to oxidative stress
318H09	YOR264W	1	0.258055		105.14		95.59		1	45.5756	41.6297	51	53.36	50.7	YOR264W	DSE3		Daughter cell-specific protein, may help establish daughter fate
332E09	YJL045W	1	0.258078		102.87		93.72		1	43.6137	41.0516	54.22	57.01	51.6	YJL045W		SDH1b	Minor succinate dehydrogenase isozyme; homologous to Sdh1p, the major isozyme reponsible for the oxidation of succinate and transfer of electrons to ubiquinone; induced during the diauxic shift in a Cat8p-dependent manner
318A02	YOR112W	1	0.258171		89.59		84		1	46.1171	42.5071	50.5	52.88	41.54	YOR112W	CEX1		Cytoplasmic component of the nuclear aminoacylation-dependent tRNA export pathway; interacts with nuclear pore component Nup116p; copurifies with tRNA export receptors Los1p and Msn5p, as well as eIF-1a and the RAN GTPase Gsp1p
331A06	YML120C	1	0.258202		86.98		78.76		1	44.5972	41.6297	55.76	56.47	46.11	YML120C	NDI1		NADH:ubiquinone oxidoreductase, transfers electrons from NADH to ubiquinone in the respiratory chain but does not pump protons, in contrast to the higher eukaryotic multisubunit respiratory complex I; phosphorylated; homolog of human AMID
318H11	YOR279C	1	0.258279		102.8		94.84		1	45.3845	41.6297	57.08	49.68	50.69	YOR279C	RFM1		DNA-binding protein required for vegetative repression of middle sporulation genes; specificity factor that directs the Hst1p histone deacetylase to some of the promoters regulated by Sum1p; involved in telomere maintenance
341C08	YDR048C	1	0.258469		101.64		92.8		1	44.6789	41.0516	47.14	49.35	47.94	YDR048C
336G12	YDL123W	1	0.258479		96.91		87.96		1	43.4774	39.6296	50.4	50.57	49.78	YDL123W	SNA4		Protein of unknown function, localized to the vacuolar outer membrane; predicted to be palmitoylated
342C10	YKL215C	1	0.258595		102.39		92.96		1	48.9172	44.6022	51.33	53.57	48.87	YKL215C	OXP1		5-oxoprolinase; enzyme is ATP-dependent and functions as a dimer; similar to mouse Oplah gene; green fluorescent protein (GFP)-fusion protein localizes to the cytoplasm
347D02	YER130C	1	0.258676		102.07		92.05		1	46.4971	43.0989	51.03	53.57	50.7	YER130C			Protein of unknown function; transcription is regulated by Haa1p, Sok2p and Zap1p transcriptional activators; the C. Albicans homolog (MNL1) plays a role in adaptation to stress
339F05	YBL106C	1	0.25888		99.01		90.14		1	41.5423	37.4233	44.85	48.53	45.21	YBL106C	SRO77	SNI2 SOP2	Protein with roles in exocytosis and cation homeostasis; functions in docking and fusion of post-Golgi vesicles with plasma membrane; homolog of Sro7p and Drosophila lethal giant larvae tumor suppressor; interacts with SNARE protein Sec9p
307C02	YOR371C	1	0.259014		102.52		92.38		1	50.4996	46.765	79.12	63.8	26.03	YOR371C	GPB1	KRH2	Multistep regulator of cAMP-PKA signaling; inhibits PKA downstream of Gpa2p and Cyr1p, thereby increasing cAMP dependency; promotes ubiquitin-dependent proteolysis of Ira2p; regulated by G-alpha protein Gpa2p; homolog of Gpb2p
307G05	YOL051W	1	0.259029		89.22		81.5		4.2	55.2088	49.647	44.42	46.51	46.11	YOL051W	GAL11	SDS4 SPT13 ABE1 RAR3 MED15	Subunit of the RNA polymerase II mediator complex; associates with core polymerase subunits to form the RNA polymerase II holoenzyme; affects transcription by acting as target of activators and repressors
308B08	YPL265W	1	0.259391		120.54		113.81		1	42.8136	40.1944	48.06	52.44	23.29	YPL265W	DIP5		Dicarboxylic amino acid permease, mediates high-affinity and high-capacity transport of L-glutamate and L-aspartate; also a transporter for Gln, Asn, Ser, Ala, and Gly
343B11	YMR135W-A	1	0.259459		95.51		88.2		1	44.4538	41.0516	46.7	49.97	52.51	YMR135W-A
332A03	YPR098C	1	0.259655		105.53		98.05		1	44.6068	41.6297	56.65	56.58	51.6	YPR098C			Protein of unknown function, localized to the mitochondrial outer membrane
331F05	YPR046W	1	0.25969		119.79		111.13		1	45.6171	42.5071	50.73	52.99	57.08	YPR046W	MCM16		Protein involved in kinetochore-microtubule mediated chromosome segregation; binds to centromere DNA
331G09	YPR070W	1	0.259714		122.24		113.31		1	39.9548	36.6176	60.22	62.62	57.98	YPR070W	MED1		Subunit of the RNA polymerase II mediator complex; associates with core polymerase subunits to form the RNA polymerase II holoenzyme; essential for transcriptional regulation
303D03	YML019W	1	0.259757		107.49		100.48		1	43.7655	40.1944	44.75	47.02	36.99	YML019W	OST6		Subunit of the oligosaccharyltransferase complex of the ER lumen, which catalyzes asparagine-linked glycosylation of newly synthesized proteins; similar to and partially functionally redundant with Ost3p
342B06	YJL165C	1	0.259782		101.35		92.56		1	42.781	40.1944	50.7	51.6	47.94	YJL165C	HAL5		Putative protein kinase; overexpression increases sodium and lithium tolerance, whereas gene disruption increases cation and low pH sensitivity and impairs potassium uptake, suggesting a role in regulation of Trk1p and/or Trk2p transporters
343F08	YOR273C	1	0.259802		103.33		95.65		1	43.2932	40.1944	48.1	51.03	50.7	YOR273C	TPO4		Polyamine transport protein, recognizes spermine, putrescine, and spermidine; localizes to the plasma membrane; member of the major facilitator superfamily
345D07	YDL027C	1	0.259813		102.23		93.79		1	43.5346	39.6296	49.19	51.7	46.11	YDL027C			Putative protein of unknown function; the authentic, non-tagged protein is detected in highly purified mitochondria in high-throughput studies; YDL027C is not an essential gene
331F08	YPR052C	1	0.259819		111.69		103.52		1	43.6207	40.1944	60.42	52.78	51.61	YPR052C	NHP6A		High-mobility group (HMG) protein that binds to and remodels nucleosomes; involved in recruiting FACT and other chromatin remodelling complexes to the chromosomes; functionally redundant with Nhp6Bp; homologous to mammalian HMGB1 and HMGB2
341F04	YNL106C	1	0.259879		101.17		94.37		1	45.5427	39.6296	52.64	56.79	57.08	YNL106C	INP52	SJL2	Polyphosphatidylinositol phosphatase, dephosphorylates a number of phosphatidylinositols (PIs) to PI; involved in endocytosis; hyperosmotic stress causes translocation to actin patches; synaptojanin-like protein with a Sac1 domain
336H09	YDL133W	1	0.259969		128.37		119.8		1	40.2368	36.6176	60.18	64.28	71.69	YDL133W	SRF1		Regulator of phospholipase D (Spo14p); interacts with Spo14p and regulates its catalytic activity; capable of buffering the toxicity of C16:0 platelet activating factor, a lipid that accumulates intraneuronally in Alzheimer's patients
339B02	YNL034W	1	0.259987		102.5		94.52		1	44.4142	41.0516	54.31	54.91	47.95	YNL034W			Putative protein of unknown function; YNL034W is not an essential gene
339B05	YNL043C	1	0.260084		99.93		91.83		1	40.8578	38.2408	49.1	52.01	48.87	YNL043C
331B04	YMR099C	1	0.260169		90.89		82.31		1	42.9492	40.1944	50.6	54.6	53.43	YMR099C		glucose-6-phosphate 1-epimerase hexose-6-phosphate mutarotase	Glucose-6-phosphate 1-epimerase (hexose-6-phosphate mutarotase), likely involved in carbohydrate metabolism; GFP-fusion protein localizes to both the nucleus and cytoplasm and is induced in response to the DNA-damaging agent MMS
310E02	YDR092W	1	0.26022		106.28		98.75		1	47.2181	43.0989	49.19	51.77	52.51	YDR092W	UBC13		Ubiquitin-conjugating enzyme involved in the error-free DNA postreplication repair pathway; interacts with Mms2p to assemble ubiquitin chains at the Ub Lys-63 residue; DNA damage triggers redistribution from the cytoplasm to the nucleus
340H07	YIR002C	1	0.260227		110.61		102.58		1	45.1442	41.6297	45.77	48.61	51.6	YIR002C	MPH1		Member of the DEAH family of helicases, functions in an error-free DNA damage bypass pathway that involves homologous recombination, binds to flap DNA and stimulates activity of Rad27p and Dna2p; mutations confer a mutator phenotype
303D10	YML012W	1	0.260361		113.33		106.02		1	45.9912	42.5071	50.8	55.34	51.6	YML012W	ERV25		Protein that forms a heterotrimeric complex with Erp1, Erp2p, and Emp24, member of the p24 family involved in endoplasmic reticulum to Golgi transport
336D05	YJR025C	1	0.260454		95.9		88.07		1	42.0905	38.2408	66.99	58.19	15.99	YJR025C	BNA1	HAD1	3-hydroxyanthranilic acid dioxygenase, required for the de novo biosynthesis of NAD from tryptophan via kynurenine; expression regulated by Hst1p
347H04	YMR058W	1	0.26047		106.88		97.73		1	45.2016	41.6297	51.9	54.22	50.7	YMR058W	FET3		Ferro-O2-oxidoreductase required for high-affinity iron uptake and involved in mediating resistance to copper ion toxicity, belongs to class of integral membrane multicopper oxidases
308A03	YOL075C	1	0.260479		109.47		100.34		1	43.6102	40.1944	63.76	54.17	54.35	YOL075C			Putative ABC transporter
301E01	YAL005C	1	0.260488		111.84		103.64		1	45.8693	41.6297	54.29	55.59	49.78	YAL005C	SSA1	YG100	ATPase involved in protein folding and nuclear localization signal (NLS)-directed nuclear transport; member of heat shock protein 70 (HSP70) family; forms a chaperone complex with Ydj1p; localized to the nucleus, cytoplasm, and cell wall
335H11	YCR065W	3	0.260624	0.136263	108.77	27.6019	103.32	28.7433	3	53.8706	49.647	65.69	70.94	59.81	YCR065W	HCM1		Forkhead transcription factor that drives S-phase specific expression of genes involved in chromosome segregation, spindle dynamics, and budding; suppressor of calmodulin mutants with specific SPB assembly defects; telomere maintenance role
332A06	YJL126W	1	0.260692		102.92		94.99		1	43.3201	39.6296	56.51	56.43	47.94	YJL126W	NIT2		Nit protein, one of two proteins in S. cerevisiae with similarity to the Nit domain of NitFhit from fly and worm and to the mouse and human Nit protein which interacts with the Fhit tumor suppressor; nitrilase superfamily member
345F09	YDL076C	1	0.26072		107.46		98.65		1	51.4372	48.9966	58.41	60.85	53.43	YDL076C	RXT3		Subunit of the RPD3L complex; involved in histone deacetylation
346A05	YDR456W	1	0.261121		108.64		102.66		1	43.4583	40.1944	49.26	49.06	42.48	YDR456W	NHX1	VPL27 NHA2 VPS44	Na+/H+ and K+/H+ exchanger, required for intracellular sequestration of Na+ and K+; located in the vacuole and late endosome compartments; required for osmotolerance to acute hypertonic shock and for vacuolar fusion
347E05	YER151C	1	0.261193		95.25		88.63		1	58.0835	55.4092	50.6	52.71	55.27	YER151C	UBP3	BLM3	Ubiquitin-specific protease that interacts with Bre5p to co-regulate anterograde and retrograde transport between the ER and Golgi; inhibitor of gene silencing; cleaves ubiquitin fusions but not polyubiquitin; also has mRNA binding activity
344A04	YML115C	1	0.261226		93.72		85.01		7.3	44.2436	38.2408	42.24	43.94	37.91	YML115C	VAN1	VRG7 VRG8 LDB13	Component of the mannan polymerase I, which contains Van1p and Mnn9p and is involved in the first steps of mannan synthesis; mutants are vanadate-resistant
333C01	YJR137C	1	0.26124		99.86		90.9		1	44.485	38.2408	45.34	46.95	47.05	YJR137C	MET5	ECM17	Sulfite reductase beta subunit, involved in amino acid biosynthesis, transcription repressed by methionine
332C03	YJL093C	1	0.261312		100.16		89.78		1	43.0884	40.1944	57.44	58.71	49.78	YJL093C	TOK1	DUK1 YPK1 YORK YKC1	Outward-rectifier potassium channel of the plasma membrane with two pore domains in tandem, each of which forms a functional channel permeable to potassium; carboxy tail functions to prevent inner gate closures; target of K1 toxin
326A10	YNL190W	1	0.261332		103.17		92.01		1	43.4955	40.1944	48.1	49.81	39.71	YNL190W			Cell wall protein of unknown function; proposed role as a hydrophilin induced by osmotic stress; contains a putative GPI-attachment site
325G09	YNL227C	1	0.261388		88.33		83.97		3.1	38.8533	35.3006	48.38	49	25.11	YNL227C	JJJ1		Co-chaperone that stimulates the ATPase activity of Ssa1p, required for a late step of ribosome biogenesis; associated with the cytosolic large ribosomal subunit; contains a J-domain; mutation causes defects in fluid-phase endocytosis
311B05	YDR368W	1	0.261409		105.27		96.08		1	44.1827	41.0516	50.97	53.29	56.19	YDR368W	YPR1		NADPH-dependent aldo-keto reductase, reduces multiple substrates including 2-methylbutyraldehyde and D,L-glyceraldehyde, expression is induced by osmotic and oxidative stress; functionally redundant with other aldo-keto reductases
339C04	YNR008W	1	0.261468		103.22		95.37		1	45.5478	41.6297	47.17	50.32	43.38	YNR008W	LRO1		Acyltransferase that catalyzes diacylglycerol esterification; one of several acyltransferases that contribute to triglyceride synthesis; putative homolog of human lecithin cholesterol acyltransferase
324H03	YBL055C	1	0.261695		93.09		83.99		1	43.1203	40.1944	49.48	51.67	54.36	YBL055C		Tat-D	3'-->5' exonuclease and endonuclease with a possible role in apoptosis; has similarity to mammalian and C. elegans apoptotic nucleases
342H12	YER037W	1	0.261813		96.62		86.8		1	58.9378	54.7093	45.18	47.74	54.36	YER037W	PHM8		Lysophosphatidic acid (LPA) phosphatase involved in LPA hydrolysis in response to phosphate starvation; phosphatase activity is soluble and Mg2+ dependent; expression is induced by low phosphate levels and by inactivation of Pho85p
343E12	YOL155C	1	0.262033		100.37		91.02		1	43.1938	40.1944	47.49	49.61	47.05	YOL155C	HPF1		Haze-protective mannoprotein that reduces the particle size of aggregated proteins in white wines
331F09	YPR053C	1	0.262036		110.84		103.11		1	44.6819	41.0516	51.87	53.36	45.21	YPR053C
323A11	YPR004C	1	0.262369		101.1		92.21		1	41.7647	38.7924	56.63	45.38	23.29	YPR004C	AIM45		Putative ortholog of mammalian electron transfer flavoprotein complex subunit ETF-alpha; interacts with frataxin, Yfh1p; null mutant displays elevated frequency of mitochondrial genome loss; may have a role in oxidative stress response
346A02	YDR452W	1	0.262431		103.77		95.76		1	43.5999	40.1944	51.7	51.9	52.51	YDR452W	PPN1	PHM5	Vacuolar endopolyphosphatase with a role in phosphate metabolism; functions as a homodimer
308D03	YPL240C	1	0.262663		108.43		100.66		1	43.3323	40.1944	45.34	49.22	45.21	YPL240C	HSP82	HSP90	Hsp90 chaperone required for pheromone signaling and negative regulation of Hsf1p; docks with Tom70p for mitochondrial preprotein delivery; promotes telomerase DNA binding and nucleotide addition; interacts with Cns1p, Cpr6p, Cpr7p, Sti1p
343D05	YIL092W	1	0.262671		102.18		93.09		1	42.2959	38.7924	48.26	49.81	43.4	YIL092W			Putative protein of unknown function; green fluorescent protein (GFP)-fusion protein localizes to the cytoplasm and to the nucleus
349A08	YMR118C	1	0.262853		97.94		87.94		1	42.6916	39.6296	45.92	49.55	51.6	YMR118C			Protein of unknown function with similarity to succinate dehydrogenase cytochrome b subunit; YMR118C is not an essential gene
317H07	YOR101W	1	0.262931		84.3		77.38		1	51.4642	46.1401	49.09	50.6	50.7	YOR101W	RAS1		GTPase involved in G-protein signaling in the adenylate cyclase activating pathway, plays a role in cell proliferation; localized to the plasma membrane; homolog of mammalian RAS proto-oncogenes
331H11	YPR093C	1	0.26297		103.52		95.66		1	44.2606	41.0516	57.33	58.41	51.6	YPR093C	ASR1		Ubiquitin ligase that modifies and regulates RNA Pol II; involved in a putative alcohol-responsive signaling pathway; accumulates in the nucleus under alcohol stress; contains a Ring/PHD finger domain similar to the mammalian rA9 protein
341H07	YGR063C	1	0.263212		82.52		76.54		3.6	55.9517	51.9686	38.3	37.69	36.99	YGR063C	SPT4		Protein involved in the regulating Pol I and Pol II transcription, pre-mRNA processing, kinetochore function, and gene silencing; forms a complex with Spt5p
343A03	YLR237W	1	0.263218		94.39		86.47		1	45.0303	41.6297	42.33	44.45	42.48	YLR237W	THI7	THI10	Plasma membrane transporter responsible for the uptake of thiamine, member of the major facilitator superfamily of transporters; mutation of human ortholog causes thiamine-responsive megaloblastic anemia
317E08	YKL142W	1	0.263294		100.63		91.48		1	42.2076	38.7924	49.06	52.88	53.43	YKL142W	MRP8	YKL3	Protein of unknown function; undergoes sumoylation; transcription induced under cell wall stress; protein levels are reduced under anaerobic conditions; originally thought to be a mitochondrial ribosomal protein based on sequence analysis
346G02	YGL131C	1	0.26338		101.57		93.74		1	41.9654	38.7924	42.98	45.83	52.51	YGL131C	SNT2		DNA binding protein with similarity to the S. pombe Snt2 protein; computational analysis suggests a role in regulation of expression of genes encoding amine transporters
330F05	YNL316C	1	0.263415		103.26		93.44		1	43.2691	40.1944	50.87	54.54	50.7	YNL316C	PHA2		Prephenate dehydratase, catalyzes the conversion of prephanate to phenylpyruvate, which is a step in the phenylalanine biosynthesis pathway
307A03	YOR342C	1	0.263421		101.74		90.52		1	51.2893	47.3955	52.34	53.53	50.7	YOR342C			Putative protein of unknown function; green fluorescent protein (GFP)-fusion protein localizes to the cytoplasm and the nucleus
329H11	YOL138C	1	0.263424		107.76		97.92		1	46.0964	43.0989	52.65	54.92	53.43	YOL138C	RTC1	SEA2	Subunit of the SEA (Seh1-associated) complex, a coatomer-related complex that associates dynamically with the vacuole; null mutation suppresses cdc13-1 temperature sensitivity; has N-terminal WD-40 repeats and a C-terminal RING motif
343B01	YML027W	1	0.2635		91.63		83.18		1	44.4555	41.0516	44.91	47.33	50.7	YML027W	YOX1		Homeodomain-containing transcriptional repressor, binds to Mcm1p and to early cell cycle boxes (ECBs) in the promoters of cell cycle-regulated genes expressed in M/G1 phase; expression is cell cycle-regulated; potential Cdc28p substrate
347C09	YER122C	1	0.263674		113.77		105.89		6.3	39.5227	36.0869	42.83	44.85	31.52	YER122C	GLO3		ADP-ribosylation factor GTPase activating protein (ARF GAP), involved in ER-Golgi transport; shares functional similarity with Gcs1p
307C12	YOR384W	1	0.263749		99.58		89.77		1	41.9474	38.7924	50.77	51.47	41.54	YOR384W	FRE5		Putative ferric reductase with similarity to Fre2p; expression induced by low iron levels; the authentic, non-tagged protein is detected in highly purified mitochondria in high-throughput studies
342F04	YBR275C	1	0.263775		100.86		91.6		1	42.6939	39.6296	58.51	64.94	59.82	YBR275C	RIF1		Protein that binds to the Rap1p C-terminus and acts synergistically with Rif2p to help control telomere length and establish telomeric silencing; deletion results in telomere elongation
322H02	YPL033C	1	0.263809		101.22		92.05		1	42.6789	39.6296	56.47	56.19	52.51	YPL033C	SRL4		Protein of unknown function; involved in regulation of dNTP production; null mutant suppresses the lethality of lcd1 and rad53 mutations; expression is induced by Kar4p
345A02	YBR130C	1	0.263873		105.29		96.36		1	42.7643	39.6296	45.34	46.92	42.48	YBR130C	SHE3		Protein that acts as an adaptor between Myo4p and the She2p-mRNA complex; part of the mRNA localization machinery that restricts accumulation of certain proteins to the bud; also required for cortical ER inheritance
315D04	YCL039W	1	0.263917		100.48		89.83		1	44.3049	41.0516	48.1	51.33	45.21	YCL039W	GID7	MOH2	Protein of unknown function, involved in proteasome-dependent catabolite inactivation of fructose-1,6-bisphosphatase; contains six WD40 repeats; computational analysis suggests that Gid7p and Moh1p have similar functions
343C12	YPL224C	1	0.263918		99.76		91.57		1	44.9528	41.6297	49.94	52.17	46.11	YPL224C	MMT2	MFT2	Putative metal transporter involved in mitochondrial iron accumulation; closely related to Mmt1p
304B05	YMR167W	1	0.263924		108.99		100.15		1	45.3644	41.6297	41.17	42.92	18.71	YMR167W	MLH1	PMS2	Protein required for mismatch repair in mitosis and meiosis as well as crossing over during meiosis; forms a complex with Pms1p and Msh2p-Msh3p during mismatch repair; human homolog is associated with hereditary non-polyposis colon cancer
346G01	YGL129C	1	0.263931		103.02		96.8		5.4	38.1791	34.5257	33.18	35.61	37.91	YGL129C	RSM23		Mitochondrial ribosomal protein of the small subunit, has similarity to mammalian apoptosis mediator proteins; null mutation prevents induction of apoptosis by overproduction of metacaspase Mca1p
345D06	YDL026W	1	0.264019		99.19		90.53		1	44.4925	41.0516	50.53	52.71	50.7	YDL026W
315D10	YCL047C	1	0.264035		101.58		89.36		1	42.9467	40.1944	50.63	54.33	28.78	YCL047C	POF1		Protein involved in the filamentation pathway; interacts physically with Kss1p and suppresses the filamentation defect of a kss1 deletion
344E02	YML066C	1	0.264046		90.62		81.39		1	51.1449	46.765	50.93	54.5	53.43	YML066C	SMA2		Meiosis-specific prospore membrane protein; required to produce bending force necessary for proper assembly of the prospore membrane during sporulation
344A09	YNR069C	1	0.264047		94.7		88.5		1	46.7574	43.0989	45.31	47.4	46.11	YNR069C	BSC5		Protein of unknown function, ORF exhibits genomic organization compatible with a translational readthrough-dependent mode of expression
307A09	YOR348C	1	0.264189		103.71		93.38		1	44.5164	41.0516	53.16	54.43	51.6	YOR348C	PUT4		Proline permease, required for high-affinity transport of proline; also transports the toxic proline analog azetidine-2-carboxylate (AzC); PUT4 transcription is repressed in ammonia-grown cells
342E01	YKR053C	1	0.264324		101.88		91.77		1	45.2605	41.0516	47.46	51.4	47.05	YKR053C	YSR3	LBP2	Dihydrosphingosine 1-phosphate phosphatase, membrane protein involved in sphingolipid metabolism; has similarity to Lcb3p
343D04	YIL058W	1	0.264542		101.4		91.34		1	43.0501	40.1944	51.7	54.64	46.11	YIL058W
341A09	YNL136W	2	0.264615	0.0809223	112.45	0.353553	104.73	2.64458	1	43.7886	41.0516	46.76	49.06	47.94	YNL136W	EAF7		Subunit of the NuA4 histone acetyltransferase complex, which acetylates the N-terminal tails of histones H4 and H2A
345G11	YDL093W	1	0.26466		98.32		90.03		1	44.2497	41.0516	47.49	49.88	49.78	YDL093W	PMT5		Protein O-mannosyltransferase, transfers mannose residues from dolichyl phosphate-D-mannose to protein serine/threonine residues; acts in a complex with Pmt3p, can instead interact with Pmt2p in some conditions; target for new antifungals
328D11	YFR017C	1	0.264723		96.65		88.01		1	44.6176	41.0516	49.65	52.68	54.36	YFR017C			Putative protein of unknown function; green fluorescent protein (GFP)-fusion protein localizes to the cytoplasm and is induced in response to the DNA-damaging agent MMS; YFR017C is not an essential gene
329A05	YKL162C-A	1	0.264849		100.31		92.38		1	45.1708	41.6297	56.86	54.85	51.6	YKL162C-A
339H06	YBR029C	1	0.265065		98.22		88.84		1	#N/A	#N/A	46.45	48.93	40.64	YBR029C	CDS1	CDG1	Phosphatidate cytidylyltransferase (CDP-diglyceride synthetase); an enzyme that catalyzes that conversion of CTP + phosphate into diphosphate + CDP-diaclglyerol, a critical step in the synthesis of all major yeast phospholipids
319H11	YLR371W	3	0.265086	0.0385935	109.777	12.4087	101.637	9.46002	5.9	43.3023	40.1944	53.81	56.15	24.21	YLR371W	ROM2		GDP/GTP exchange factor (GEF) for Rho1p and Rho2p; mutations are synthetically lethal with mutations in rom1, which also encodes a GEF
330G01	YML074C	1	0.265203		104.01		94.5		1	41.3802	38.2408	65.93	53.93	15.99	YML074C	FPR3	NPI46	Nucleolar peptidyl-prolyl cis-trans isomerase (PPIase); FK506 binding protein; phosphorylated by casein kinase II (Cka1p-Cka2p-Ckb1p-Ckb2p) and dephosphorylated by Ptp1p
310C05	YDR057W	1	0.265219		110.09		102.81		1	43.2179	40.1944	56.58	62.32	57.08	YDR057W	YOS9		ER quality-control lectin; integral subunit of the HRD ligase; binds to glycans with terminal alpha-1,6 linked mannose on misfolded N-glycosylated proteins and participates in targeting proteins to ERAD; member of the OS-9 protein family
330G07	YML097C	2	0.265246	0.0800625	113.615	14.4179	104.985	13.9654	1	47.6873	44.6022	52.2	58.01	54.36	YML097C	VPS9	VPL31 VPT9	A guanine nucleotide exchange factor involved in vesicle-mediated vacuolar protein transport; specifically stimulates the intrinsic guanine nucleotide exchange activity of Vps21p/Rab5: similar to mammalian ras inhibitors; binds ubiquitin
341E05	YNL085W	1	0.265251		100.31		92.05		1	46.2465	42.5071	48.06	50.44	36.99	YNL085W	MKT1		Protein that forms a complex with Pbp1p that may mediate posttranscriptional regulation of HO; involved in propagation of M2 dsRNA satellite of L-A virus; allelic variation affects mitochondrial genome stability, drug resistance, and more
337C05	YDL180W	1	0.265259		93.92		83.47		1	39.7026	36.6176	47.62	49.48	49.78	YDL180W			Putative protein of unknown function; green fluorescent protein (GFP)-fusion protein localizes to the vacuole
345G05	YDL085W	1	0.265432		98.61		90.58		1	44.0878	41.0516	49.97	52.41	51.6	YDL085W	NDE2	NDH2	Mitochondrial external NADH dehydrogenase, catalyzes the oxidation of cytosolic NADH; Nde1p and Nde2p are involved in providing the cytosolic NADH to the mitochondrial respiratory chain
334B10	YGL214W	1	0.265434		98.08		91.02		1	61.3452	56.8268	50.14	52.82	52.51	YGL214W
344F07	YPR037C	1	0.265576		93.8		85.74		1	45.0761	41.6297	48.29	50.53	41.54	YPR037C	ERV2		Flavin-linked sulfhydryl oxidase localized to the endoplasmic reticulum lumen, involved in disulfide bond formation within the ER
336H03	YDL125C	3	0.265666	0.0660437	104.23	7.01225	97.07	5.53762	1	49.1353	45.2132	55.94	58.45	54.36	YDL125C	HNT1		Adenosine 5'-monophosphoramidase; interacts physically and genetically with Kin28p, a CDK and TFIIK subunit, and genetically with CAK1; member of the histidine triad (HIT) superfamily of nucleotide-binding proteins and similar to Hint
324G06	YBL046W	2	0.26568	0.00374521	123.955	1.30815	114.19	0.509117	1	46.8146	43.9967	74.62	65.7	62.56	YBL046W	PSY4		Putative regulatory subunit of an evolutionarily conserved protein phosphatase; localization is cell-cycle dependent and regulated by Cdc28p phosphorylation; required for cisplatin resistance; homolog of mammalian R2
346B02	YDR469W	1	0.265741		112.07		104.25		1	49.3226	46.1401	48.35	52.48	57.08	YDR469W	SDC1	SAF19 CPS25	Subunit of the COMPASS (Set1C) complex, which methylates lysine 4 of histone H3 and is required in chromatin silencing at telomeres; contains a Dpy-30 domain that mediates interaction with Bre2p; similar to C. elegans and human DPY-30
306E01	YOR079C	1	0.265782		102.97		96.03		1	44.5113	41.6297	54.11	44.18	43.38	YOR079C	ATX2	YOR29-30	Golgi membrane protein involved in manganese homeostasis; overproduction suppresses the sod1 (copper, zinc superoxide dismutase) null mutation
302G12	YLR111W	2	0.265917	0.0751914	92.165	6.20133	85.28	2.885	1	45.9574	41.6297	53.88	57.11	36.99	YLR111W
306H08	YOR327C	1	0.265938		87.17		80.82		1	52.3843	47.3955	42.33	41.75	35.16	YOR327C	SNC2		Vesicle membrane receptor protein (v-SNARE) involved in the fusion between Golgi-derived secretory vesicles with the plasma membrane; member of the synaptobrevin/VAMP family of R-type v-SNARE proteins
343G04	YFL019C	1	0.265947		100.89		91.9		1	44.1053	40.1944	50.27	53.64	46.11	YFL019C
326A11	YNL187W	1	0.265996		102.95		93.28		1	43.2785	40.1944	45.8	47.46	33.33	YNL187W	SWT21		Protein involved in mRNA splicing; contains a consensus nuclear export signal (NES) sequence similar to the consensus sequence recognized by Crm1p; interacts genetically with Prp40p and Tgs1p; contains WD40 repeats
345B07	YBR159W	1	0.265999		104.6		96.54		1	48.299	44.6022	48.61	49.91	46.11	YBR159W	IFA38		Microsomal beta-keto-reductase; contains oleate response element (ORE) sequence in the promoter region; mutants exhibit reduced VLCFA synthesis, accumulate high levels of dihydrosphingosine, phytosphingosine and medium-chain ceramides
339H08	YBR032W	1	0.266057		98.43		89.54		1	43.9277	40.1944	42.71	46.57	9.592	YBR032W
307G02	YOL048C	1	0.266177		97.65		89.35		1	43.7698	40.1944	49.61	51.16	45.21	YOL048C	RRT8		Putative protein of unknown function; identified in a screen for mutants with increased levels of rDNA transcription; green fluorescent protein (GFP)-fusion protein localizes to lipid particles
347G03	YER183C	1	0.266193		103.99		94.66		1	44.078	40.1944	54.43	55.97	51.6	YER183C	FAU1		5,10-methenyltetrahydrofolate synthetase, involved in folic acid biosynthesis
342C02	YJL200C	1	0.266196		102.48		93.29		1	44.0761	39.6296	50.47	52.48	46.11	YJL200C	ACO2		Putative mitochondrial aconitase isozyme; similarity to Aco1p, an aconitase required for the TCA cycle; expression induced during growth on glucose, by amino acid starvation via Gcn4p, and repressed on ethanol
315A08	YHR200W	1	0.26622		89.25		80.23		1	45.2431	41.6297	65.43	57.03	51.61	YHR200W	RPN10	SUN1 MCB1	Non-ATPase base subunit of the 19S regulatory particle (RP) of the 26S proteasome; N-terminus plays a role in maintaining the structural integrity of the RP; binds selectively to polyubiquitin chains; homolog of the mammalian S5a protein
325H07	YNL206C	1	0.266258		110.15		99.18		1	45.8259	42.5071	52	54.12	53.43	YNL206C	RTT106		Histone chaperone, involved in regulation of chromatin structure in both transcribed and silenced chromosomal regions; affects transcriptional elongation; has a role in regulation of Ty1 transposition
308H09	YPL163C	1	0.266364		109.33		101.21		1	46.8464	42.5071	53.64	54.6	39.71	YPL163C	SVS1		Cell wall and vacuolar protein, required for wild-type resistance to vanadate
343G03	YFL014W	1	0.26642		101.98		93.15		1	43.7275	41.0516	48.96	51.57	50.7	YFL014W	HSP12	HOR5 GLP1	Plasma membrane protein involved in maintaining membrane organization in stress conditions; induced by heat shock, oxidative stress, osmostress, stationary phase, glucose depletion, oleate and alcohol; regulated by HOG and Ras-Pka pathways
307E02	YOL015W	1	0.266593		96.94		88.35		1	44.0155	40.1944	55.87	55.94	50.7	YOL015W	IRC10		Putative protein of unknown function; null mutant displays increased levels of spontaneous Rad52p foci
346D06	YDR513W	1	0.266788		100.35		91.83		1	43.969	41.0516	49.09	50.5	47.94	YDR513W	GRX2	TTR1	Cytoplasmic glutaredoxin, thioltransferase, glutathione-dependent disulfide oxidoreductase involved in maintaining redox state of target proteins, also exhibits glutathione peroxidase activity, expression induced in response to stress
332E03	YJL053W	1	0.266827		106.51		97.39		1	47.4721	43.9967	52.27	55.73	55.27	YJL053W	PEP8	GRD6 VPS26 VPT4	Vacuolar protein sorting protein that forms part of the multimeric membrane-associated retromer complex along with Vps35p, Vps29p, Vps17p, and Vps5p; essential for endosome-to-Golgi retrograde protein transport
326D05	YKL221W	1	0.266831		97.25		88.73		1	43.8964	41.0516	44.21	46.08	36.06	YKL221W	MCH2		Protein with similarity to mammalian monocarboxylate permeases, which are involved in transport of monocarboxylic acids across the plasma membrane; mutant is not deficient in monocarboxylate transport
314G10	YHR154W	2	0.266849	0.0986404	122.84	7.77817	113.645	5.04167	1	48.8792	43.0989	60.92	61.62	38.81	YHR154W	RTT107	ESC4	Protein implicated in Mms22-dependent DNA repair during S phase, DNA damage induces phosphorylation by Mec1p at one or more SQ/TQ motifs; interacts with Mms22p and Slx4p; has four BRCT domains; has a role in regulation of Ty1 transposition
348A04	YIL085C	1	0.266917		97.41		90.98		1	42.7794	39.6296	50.01	51.6	52.51	YIL085C	KTR7		Putative mannosyltransferase involved in protein glycosylation; member of the KRE2/MNT1 mannosyltransferase family
302B06	YLR003C	1	0.267116		115.18		107.63		1	42.4363	39.6296	53.46	56.51	52.51	YLR003C	CMS1		Subunit of U3-containing 90S preribosome processome complex involved in production of 18S rRNA and assembly of small ribosomal subunit; overexpression rescues supressor mutant of mcm10; null mutant is viable
346C03	YDR492W	1	0.267192		99.53		91.55		1	44.8721	41.6297	53.12	54.67	50.7	YDR492W	IZH1		Membrane protein involved in zinc ion homeostasis, member of the four-protein IZH family; transcription is regulated directly by Zap1p, expression induced by zinc deficiency and fatty acids; deletion increases sensitivity to elevated zinc
332E05	YJL051W	1	0.267363		94.64		86.34		1	42.7607	38.7924	53.74	54.05	32.42	YJL051W	IRC8		Bud tip localized protein of unknown function; mRNA is targeted to the bud by a She2p dependent transport system; mRNA is cell cycle regulated via Fkh2p, peaking in G2/M phase; null mutant displays increased levels of spontaneous Rad52p foc
332H07	YNL274C	1	0.267432		101.89		93.32		1	46.0926	42.5071	50.37	52.75	56.19	YNL274C	GOR1		Glyoxylate reductase; null mutation results in increased biomass after diauxic shift; the authentic, non-tagged protein is detected in highly purified mitochondria in high-throughput studies
346D03	YDR509W	1	0.26752		105.31		97.5		4.6	44.0842	41.6297	47.33	50.01	45.21	YDR509W
325B10	YGL002W	1	0.267551		97.11		92.55		1	43.7	39.6296	46.51	48.61	45.21	YGL002W	ERP6		Protein with similarity to Emp24p and Erv25p, member of the p24 family involved in ER to Golgi transport; the authentic, non-tagged protein is detected in highly purified mitochondria in high-throughput studies
336A03	YCR073W-A	1	0.267722		97.68		88.62		1	44.2002	41.0516	56.22	55.06	52.51	YCR073W-A	SOL2	YCRX13W	Protein with a possible role in tRNA export; shows similarity to 6-phosphogluconolactonase non-catalytic domains but does not exhibit this enzymatic activity; homologous to Sol1p, Sol3p, and Sol4p
345F07	YDL073W	1	0.267765		107.85		99.62		1	41.9449	38.7924	50.67	53.26	41.54	YDL073W			Putative protein of unknown function; YDL073W is not an essential gene
341H03	YGR038W	1	0.267826		101.63		94.24		1	49.4661	44.6022	46.33	48.51	50.7	YGR038W	ORM1		Evolutionarily conserved protein, similar to Orm2p, required for resistance to agents that induce unfolded protein response; Orm1p and Orm2p together control membrane biogenesis by coordinating lipid homeostasis with protein quality control
311H02	YEL028W	1	0.26784		97.06		89.51		1	43.2813	39.6296	51.5	52.34	37.91	YEL028W
330F04	YNL300W	2	0.267939	0.0905245	97.075	8.57721	89.38	6.66095	1	44.2704	41.0516	52.48	53.74	47.05	YNL300W	TOS6		Glycosylphosphatidylinositol-dependent cell wall protein, expression is periodic and decreases in respone to ergosterol perturbation or upon entry into stationary phase; depletion increases resistance to lactic acid
323B09	YPR121W	1	0.268025		99.82		91.2		1	45.6434	42.5071	50.53	52.17	49.78	YPR121W	THI22		Protein with similarity to hydroxymethylpyrimidine phosphate kinases; member of a gene family with THI20 and THI21; not required for thiamine biosynthesis
318C07	YOR165W	1	0.268034		95.74		89.94		1	44.3265	41.0516	52.04	55.87	52.51	YOR165W	SEY1		GTPase with a role in ER morphology; interacts physically and genetically with Yop1p and Rtn1p; possible functional ortholog of mammalian atlastins, defects in which cause a form of hereditary spastic paraplegia; homolog of Arabidopsis RHD3
331F02	YPR042C	1	0.268044		109.62		100.89		1	42.6755	39.6296	51.33	53.77	50.7	YPR042C	PUF2		Member of the PUF protein family, which is defined by the presence of Pumilio homology domains that confer RNA binding activity; preferentially binds mRNAs encoding membrane-associated proteins
347A07	YGL167C	1	0.268088		75.75		66.85		8.2	50.0585	44.6022	55.06	57.44	54.36	YGL167C	PMR1	BSD1 SSC1 LDB1	High affinity Ca2+/Mn2+ P-type ATPase required for Ca2+ and Mn2+ transport into Golgi; involved in Ca2+ dependent protein sorting and processing; mutations in human homolog ATP2C1 cause acantholytic skin condition Hailey-Hailey disease
347A11	YGL176C	1	0.268101		104.03		94.43		1	42.9525	39.6296	45.4	48.13	47.94	YGL176C			Putative protein of unknown function; deletion mutant is viable and has no detectable phenotype
301G11	YLL023C	1	0.268139		112.75		105.05		1	42.1259	38.7924	51.7	51.7	38.82	YLL023C	POM33		Transmembrane nucleoporin involved in nuclear pore complex (NPC) distribution, assembly or stabilization; highly conserved across species, orthologous to human TMEM33 and paralogous to Per33p
339H04	YBR027C	1	0.268191		133.07		123.03		1	42.7183	38.7924	57.02	63.49	64.39	YBR027C
342H11	YER027C	1	0.268286		95.49		86.37		1	46.6717	43.0989	45.37	47.21	35.17	YER027C	GAL83	SPM1	One of three possible beta-subunits of the Snf1 kinase complex, allows nuclear localization of the Snf1 kinase complex in the presence of a nonfermentable carbon source; contains glycogen-binding domain
342E06	YBR090C	1	0.268396		100.05		90.45		1	42.5547	38.7924	53.4	56.08	41.54	YBR090C			Putative protein of unknown function; green fluorescent protein (GFP)-fusion protein localizes to the cytoplasm and nucleus
339H12	YBR036C	1	0.268398		95.11		86.39		1	43.2809	40.1944	36.31	39.74	42.47	YBR036C	CSG2	CLS2	Endoplasmic reticulum membrane protein, required for mannosylation of inositolphosphorylceramide and for growth at high calcium concentrations
307B10	YOR365C	1	0.268495		99.25		89.11		1	43.9926	40.1944	48.58	50.9	54.36	YOR365C			Putative protein of unknown function; YOR365C is not an essential protein
314H03	YHR158C	1	0.268572		97.35		91.11		1	39.0595	35.3006	39.15	40.48	40.65	YHR158C	KEL1		Protein required for proper cell fusion and cell morphology; functions in a complex with Kel2p to negatively regulate mitotic exit, interacts with Tem1p and Lte1p; localizes to regions of polarized growth; potential Cdc28p substrate
307F04	YOL036W	1	0.268632		92.9		85.33		1	46.4504	42.5071	45.49	49.78	49.78	YOL036W			Protein of unknown function; potential Cdc28p substrate
344C02	YFL019C	1	0.268637		93.65		83.39		1	44.1053	40.1944	49.19	51.67	47.94	YFL019C
336D02	YJR020W	1	0.268639		94.62		85.76		1	43.4875	41.0516	50.6	54.05	51.6	YJR020W
336H05	YDL128W	1	0.268653		97.21		88.46		1	44.3282	41.0516	50.93	52.04	46.11	YDL128W	VCX1	HUM1 MNR1	Vacuolar membrane antiporter with Ca2+/H+ and K+/H+ exchange activity, involved in control of cytosolic Ca2+ and K+ concentrations; has similarity to sodium/calcium exchangers, including the bovine Na+/Ca2+,K+ antiporter
346H09	YGL156W	3	0.268669	0.138799	100.767	1.5783	93.58	2.52513	1	44.103	40.1944	52.17	52.92	50.7	YGL156W	AMS1		Vacuolar alpha mannosidase, involved in free oligosaccharide (fOS) degradation; delivered to the vacuole in a novel pathway separate from the secretory pathway
348C04	YAL024C	1	0.268724		114.75		105.64		1	43.813	40.1944	54.59	58.18	48.87	YAL024C	LTE1	MSI2	Protein similar to GDP/GTP exchange factors but without detectable GEF activity; required for asymmetric localization of Bfa1p at daughter-directed spindle pole bodies and for mitotic exit at low temperatures
314A01	YHR015W	1	0.268771		96.54		87.32		1	42.0772	38.7924	47.94	49.71	49.78	YHR015W	MIP6		Putative RNA-binding protein, interacts with Mex67p, which is a component of the nuclear pore involved in nuclear mRNA export
314G12	YHR156C	1	0.268835		91.64		85.94		1	42.6267	39.6296	50.01	51.8	50.7	YHR156C	LIN1	SNU40	Non-essential component of U5 snRNP; nuclear protein; physically interacts with Irr1p of cohesin complex; may link together proteins involved in chromosome segregation, mRNA splicing and DNA replication
327F08	YIL024C	1	0.269002		99.47		89.69		1	41.5602	38.2408	52.41	54.64	52.51	YIL024C			Putative protein of unknown function; non-essential gene; expression directly regulated by the metabolic and meiotic transcriptional regulator Ume6p
325E08	YGL067W	1	0.269029		103.88		92.39		1	44.4659	41.6297	46.17	48.74	48.87	YGL067W	NPY1		NADH diphosphatase (pyrophosphatase), hydrolyzes the pyrophosphate linkage in NADH and related nucleotides; localizes to peroxisomes
301G08	YLL019C	2	0.269045	0.0150909	103.58	12.6289	96.545	11.9147	1	43.9864	41.0516	47.46	48.51	38.82	YLL019C	KNS1	L124	Nonessential putative protein kinase of unknown cellular role; member of the LAMMER family of protein kinases, which are serine/threonine kinases also capable of phosphorylating tyrosine residues
330C05	YLL049W	1	0.269075		107.44		99.42		1	50.5824	46.1401	59.88	59.85	54.36	YLL049W	LDB18		Component of the dynactin complex, which is required for dynein activity; null mutant exhibits defects in nuclear migration and spindle orientation and has reduced affinity for alcian blue dye; has homology to mammalian dynactin subunit p24
347G09	YMR052W	1	0.269092		104.99		96.6		1	46.314	42.5071	51.6	53.53	48.87	YMR052W	FAR3		Protein involved in recovery from cell cycle arrest in response to pheromone, in a Far1p-independent pathway; interacts with Far7p, Far8p, Far9p, Far10p, and Far11p; localizes to the endoplasmic reticulum
318F02	YOR220W	1	0.269107		94.08		86.69		1	43.5662	40.1944	48.93	51.7	52.51	YOR220W	RCN2	WSP1	Protein of unknown function; green fluorescent protein (GFP)-fusion protein localizes to the cytoplasm and is induced in response to the DNA-damaging agent MMS; phosphorylated in response to alpha factor
301E06	YAR015W	2	0.269129	0.0165036	101.36	11.0167	95.675	9.63787	1	41.9211	38.7924	60.74	62.17	52.51	YAR015W	ADE1		N-succinyl-5-aminoimidazole-4-carboxamide ribotide (SAICAR) synthetase, required for 'de novo' purine nucleotide biosynthesis; red pigment accumulates in mutant cells deprived of adenine
310E10	YDR100W	1	0.269167		100.86		94.1		1	43.3588	40.1944	51.6	55.13	57.08	YDR100W	TVP15		Integral membrane protein localized to late Golgi vesicles along with the v-SNARE Tlg2p
309G02	YBR207W	1	0.269221		112.98		102.08		1	46.3165	43.0989	49.32	52.41	54.36	YBR207W	FTH1		Putative high affinity iron transporter involved in transport of intravacuolar stores of iron; forms complex with Fet5p; expression is regulated by iron; proposed to play indirect role in endocytosis
334F09	YLR286C	1	0.269255		101.13		95.98		1	49.0482	44.6022	49.52	52.82	53.43	YLR286C	CTS1		Endochitinase, required for cell separation after mitosis; transcriptional activation during the G1 phase of the cell cycle is mediated by transcription factor Ace2p
342H03	YCR083W	1	0.269257		99.99		90.54		1	44.9532	41.6297	49.32	52.37	44.3	YCR083W	TRX3		Mitochondrial thioredoxin, highly conserved oxidoreductase required to maintain the redox homeostasis of the cell, forms the mitochondrial thioredoxin system with Trr2p, redox state is maintained by both Trr2p and Glr1p
343A06	YLR346C	1	0.269308		101.28		93.51		1	44.445	41.0516	44.48	47.02	48.87	YLR346C			Putative protein of unknown function found in mitochondria; expression is regulated by transcription factors involved in pleiotropic drug resistance, Pdr1p and Yrr1p; YLR346C is not an essential gene
329A03	YIR042C	1	0.269504		96.7		88.18		1	47.0536	43.9967	63.24	60.78	48.87	YIR042C			Putative protein of unknown function; YIR042C is a non-essential gene
349A05	YPR133W-A	1	0.269524		117.78		109.45		1	68.5	67.0332	49.88	54.15	52.51	YPR133W-A	TOM5	MOM8A	Component of the TOM (translocase of outer membrane) complex responsible for recognition and initial import of all mitochondrially directed proteins; involved in transfer of precursors from the Tom70p and Tom20p receptors to the Tom40p pore
349A04	YPR118W	1	0.269563		99.34		89.36		1	43.8939	41.0516	48.45	51.93	56.19	YPR118W	MRI1		5'-methylthioribose-1-phosphate isomerase; catalyzes the isomerization of 5-methylthioribose-1-phosphate to 5-methylthioribulose-1-phosphate in the methionine salvage pathway
318H06	YOR255W	1	0.269637		104.49		94.74		1	43.7719	40.1944	53.95	55.48	52.51	YOR255W	OSW1		Protein involved in sporulation; required for the construction of the outer spore wall layers; required for proper localization of Spo14p
329E02	YNR072W	1	0.269696		100.11		90.35		1	44.1127	41.0516	51.77	54.88	55.27	YNR072W	HXT17		Hexose transporter, up-regulated in media containing raffinose and galactose at pH 7.7 versus pH 4.7, repressed by high levels of glucose
343A08	YLR361C	2	0.269713	0.092545	104.445	0.459619	97.17	1.49907	1	46.6162	43.0989	46.23	48.83	48.87	YLR361C	DCR2		Phosphoesterase involved in downregulation of the unfolded protein response, at least in part via dephosphorylation of Ire1p; dosage-dependent positive regulator of the G1/S phase transition through control of the timing of START
331B10	YMR106C	1	0.269719		96.36		87.38		1	50.0257	46.1401	51.53	54.5	54.36	YMR106C	YKU80	HDF2	Subunit of the telomeric Ku complex (Yku70p-Yku80p), involved in telomere length maintenance, structure and telomere position effect; relocates to sites of double-strand cleavage to promote nonhomologous end joining during DSB repair
306H04	YOR321W	1	0.269768		96.89		89.45		1	46.8901	43.0989	45.37	45.88	40.64	YOR321W	PMT3		Protein O-mannosyltransferase, transfers mannose residues from dolichyl phosphate-D-mannose to protein serine/threonine residues; acts in a complex with Pmt5p, can instead interact with Pmt1p in some conditions; target for new antifungals
332E12	YJL038C	1	0.269856		105.59		96.95		1	#N/A	#N/A	49.65	51.33	48.87	YJL038C	LOH1	OSW4	Protein of unknown function with proposed roles in maintenance of genome integrity and also in spore wall assembly; induced during sporulation; repressed during vegetative growth by Sum1p and Hst1p; sequence similar to IRC1
314C06	YHR076W	1	0.269865		97.29		89.05		1	42.4351	40.1944	51.06	55.2	55.27	YHR076W	PTC7		Type 2C protein phosphatase (PP2C); alternatively spliced to create two mRNA isoforms; protein from spliced form localizes to the mitochondria while the one from the unspliced form is localized to the nuclear envelope
308C07	YPL250C	1	0.269972		103.32		94.6		1	43.5583	40.1944	42.18	46.3	45.21	YPL250C	ICY2		Protein of unknown function; mobilized into polysomes upon a shift from a fermentable to nonfermentable carbon source; potential Cdc28p substrate
344A01	YLR390W-A	1	0.270006		90.93		80.77		1	42.5515	39.6296	46.48	49	47.05	YLR390W-A	CCW14	YLR391W-A SSR1 ICWP YLR391W	Covalently linked cell wall glycoprotein, present in the inner layer of the cell wall
317A12	YKL085W	1	0.2701		102.47		93.83		1	44.2044	41.0516	42.48	44.75	36.06	YKL085W	MDH1		Mitochondrial malate dehydrogenase, catalyzes interconversion of malate and oxaloacetate; involved in the tricarboxylic acid (TCA) cycle; phosphorylated
325F06	YGL086W	1	0.270431		100.15		94.79		1	43.2761	40.1944	50.14	52.41	55.27	YGL086W	MAD1		Coiled-coil protein involved in the spindle-assembly checkpoint; phosphorylated by Mps1p upon checkpoint activation which leads to inhibition of the activity of the anaphase promoting complex; forms a complex with Mad2p
307E11	YOL029C	2	0.270437	0.0124981	91.125	12.1834	82.71	11.5966	1	46.9357	43.0989	74.68	63.58	62.56	YOL029C			Putative protein of unknown function; identified as interacting with Hsc82p and Hsp82p in high-throughput two-hybrid screens
346G07	YGL138C	1	0.270474		102.76		95.23		1	43.8516	41.0516	53.98	56.68	44.3	YGL138C			Putative protein of unknown function; has no significant sequence similarity to any known protein
347B05	YER103W	1	0.27048		102.27		91.38		1	39.1852	35.3006	48.38	50.7	46.11	YER103W	SSA4	YG107	Heat shock protein that is highly induced upon stress; plays a role in SRP-dependent cotranslational protein-membrane targeting and translocation; member of the HSP70 family; cytoplasmic protein that concentrates in nuclei upon starvation
318D07	YOR186W	1	0.270609		93.18		86.42		1	43.8481	40.1944	49.16	51.87	54.36	YOR186W			Putative protein of unknown function; proper regulation of expression during heat stress is sphingolipid-dependent
304A02	YMR148W	1	0.270649		103.35		93.63		1	43.9704	40.1944	50.9	53.22	44.3	YMR148W	OSW5		Protein of unknown function that may play a role in spore wall assembly; predicted to contain an N-terminal transmembrane domain; osw5 null mutant spores exhibit increased spore wall permeability and sensitivity to beta-glucanase digestion
307H10	YOL067C	1	0.27067		101.17		92.74		1	40.9352	38.2408	41.14	42.42	23.29	YOL067C	RTG1		Transcription factor (bHLH) involved in interorganelle communication between mitochondria, peroxisomes, and nucleus
335G12	YCR034W	1	0.270672		96.03		88.28		1	49.6963	46.1401	50.37	50.77	34.24	YCR034W	FEN1	GNS1 VBM2 ELO2	Fatty acid elongase, involved in sphingolipid biosynthesis; acts on fatty acids of up to 24 carbons in length; mutations have regulatory effects on 1,3-beta-glucan synthase, vacuolar ATPase, and the secretory pathway
330G05	YML095C-A	1	0.270689		106.93		98.34		3.4	47.1979	42.5071	65.72	56.85	41.56	YML095C-A
317A04	YKL073W	1	0.270691		147.95		140.09		1	47.6115	43.9967	64.08	66.12	36.99	YKL073W	LHS1	CER1 SSI1	Molecular chaperone of the endoplasmic reticulum lumen, involved in polypeptide translocation and folding; nucleotide exchange factor for the ER lumenal Hsp70 chaperone Kar2p; regulated by the unfolded protein response pathway
339C07	YNR013C	1	0.270715		100.91		92.74		1	46.9659	42.5071	49.21	51.68	48.87	YNR013C	PHO91		Low-affinity phosphate transporter of the vacuolar membrane; deletion of pho84, pho87, pho89, pho90, and pho91 causes synthetic lethality; transcription independent of Pi and Pho4p activity; overexpression results in vigorous growth
344D06	YKR095W	1	0.270937		85.57		76.14		1	43.7782	40.1944	49.22	51.5	47.05	YKR095W	MLP1	MPL1	Myosin-like protein associated with the nuclear envelope, connects the nuclear pore complex with the nuclear interior; involved with Tel1p in telomere length control; involved with Pml1p and Pml39p in nuclear retention of unspliced mRNAs
331F10	YPR054W	1	0.270979		108.62		100.91		1	45.8133	41.6297	57.94	61.26	53.43	YPR054W	SMK1		Middle sporulation-specific mitogen-activated protein kinase (MAPK) required for production of the outer spore wall layers; negatively regulates activity of the glucan synthase subunit Gsc2p
339B09	YNL049C	1	0.271066		103.23		95.22		1	43.6576	41.0516	53.7	55.63	51.61	YNL049C	SFB2	ISS1	Component of the Sec23p-Sfb2p heterodimer of the COPII vesicle coat, required for cargo selection during vesicle formation in ER to Golgi transport; homologous to Sec24p and Sfb3p
318E07	YOR208W	1	0.271221		96.12		89.94		1	43.8157	40.1944	57.73	60.44	55.27	YOR208W	PTP2		Phosphotyrosine-specific protein phosphatase involved in the inactivation of mitogen-activated protein kinase (MAPK) during osmolarity sensing; dephosporylates Hog1p MAPK and regulates its localization; localized to the nucleus
304A09	YMR157C	1	0.271242		106.4		97.57		1	43.9212	40.1944	46.42	49.26	52.51	YMR157C	AIM36	FMP39	Protein of unknown function; null mutant displays reduced respiratory growth and elevated frequency of mitochondrial genome loss; the authentic, non-tagged protein is detected in purified mitochondria in high-throughput studies
342C08	YKL201C	1	0.271249		100.56		91.42		1	44.4012	41.0516	53.19	54.67	50.7	YKL201C	MNN4	YKL200C	Putative positive regulator of mannosylphosphate transferase (Mnn6p), involved in mannosylphosphorylation of N-linked oligosaccharides; expression increases in late-logarithmic and stationary growth phases
304B02	YMR163C	1	0.271256		105.8		96.39		1	43.9038	40.1944	65.04	57.2	58.91	YMR163C	INP2		Peroxisome-specific receptor important for peroxisome inheritance; co-fractionates with peroxisome membranes and co-localizes with peroxisomes in vivo; physically interacts with the myosin V motor Myo2p; INP2 is not an essential gene
343D03	YIL030C	1	0.271271		100.3		90.38		1	43.2601	40.1944	50.3	51.6	51.6	YIL030C	SSM4	DOA10 KIS3	Ubiquitin-protein ligase involved in ER-associated protein degradation; located in the ER/nuclear envelope; ssm4 mutation suppresses mRNA instability caused by an rna14 mutation
330D04	YLR040C	1	0.271297		100.29		91.64		1	40.1869	37.4233	49.55	52.71	51.6	YLR040C			Putative protein of unknown function; localizes to the cell wall; predicted to be a GPI-attached protein; upregulated by Mcm1p-Alpha1p transcription factor; partially overlaps the dubious ORF YLR041W; YLR040C is not essential
329G05	YOL113W	1	0.271563		101.99		92.66		1	45.0752	41.6297	55.48	55.83	49.78	YOL113W	SKM1		Member of the PAK family of serine/threonine protein kinases with similarity to Ste20p and Cla4p; involved in down-regulation of sterol uptake; proposed to be a downstream effector of Cdc42p during polarized growth
326H05	YDR250C	1	0.271698		96.94		87.94		1	44.3957	41.0516	53.69	54.7	42.47	YDR250C
341B12	YNL092W	1	0.271711		105.22		97.03		1	43.8114	41.0516	50.53	52.44	47.05	YNL092W			Putative S-adenosylmethionine-dependent methyltransferase of the seven beta-strand family; YNL092W is not an essential gene
325H09	YNL204C	1	0.271726		107.1		96.77		1	43.9637	41.0516	56.4	57.29	52.51	YNL204C	SPS18	SPX18	Protein of unknown function, contains a putative zinc-binding domain; expressed during sporulation
346A12	YDR466W	1	0.271916		106.53		98.29		1	45.7136	42.5071	50.07	52.04	47.94	YDR466W	PKH3		Protein kinase with similarity to mammalian phosphoinositide-dependent kinase 1 (PDK1) and yeast Pkh1p and Pkh2p, two redundant upstream activators of Pkc1p; identified as a multicopy suppressor of a pkh1 pkh2 double mutant
307D02	YOR386W	1	0.272218		101.85		92.62		1	44.0662	40.1944	54.02	54.26	47.05	YOR386W	PHR1		DNA photolyase involved in photoreactivation, repairs pyrimidine dimers in the presence of visible light; induced by DNA damage; regulated by transcriptional repressor Rph1p
322G12	YPL035C	1	0.272288		101.35		91.54		1	43.757	40.1944	56.15	56.43	55.27	YPL035C
310H03	YDR135C	1	0.272318		92.38		85.67		1	45.4896	42.5071	59.77	63.97	57.98	YDR135C	YCF1		Vacuolar glutathione S-conjugate transporter of the ATP-binding cassette family, has a role in detoxifying metals such as cadmium, mercury, and arsenite; also transports unconjugated bilirubin; similar to human cystic fibrosis protein CFTR
338B07	YGL020C	1	0.272344		108.06		101.17		1	46.1304	41.6297	42.54	46.84	22.38	YGL020C	GET1	MDM39	Subunit of the GET complex; involved in insertion of proteins into the ER membrane; required for the retrieval of HDEL proteins from the Golgi to the ER in an ERD2 dependent fashion and for normal mitochondrial morphology and inheritance
333C05	YJR152W	1	0.272348		94.56		86.53		1	44.7909	38.7924	53.26	55.16	52.51	YJR152W	DAL5	UREP1	Allantoate permease; ureidosuccinate permease; also transports dipeptides, though with lower affinity than for allantoate and ureidosuccinate; expression is constitutive but sensitive to nitrogen catabolite repression
337E05	YGR049W	1	0.272362		88.68		79.31		1	44.955	41.6297	56.79	57.51	48.87	YGR049W	SCM4		Potential regulatory effector of CDC4 function, suppresses a temperature-sensitive allele of CDC4, tripartite protein structure in which a charged region separates two uncharged domains, not essential for mitosis or meiosis
342B03	YJL160C	1	0.272441		101.61		92.29		1	46.4575	43.0989	56.12	56.72	50.7	YJL160C			Putative protein of unknown function; member of the PIR (proteins with internal repeats) family of cell wall proteins; non-essential gene that is required for sporulation; mRNA is weakly cell cycle regulated, peaking in mitosis
346B05	YDR474C	1	0.272451		106.8		98.5		1	46.0101	42.5071	53.5	54.33	47.94	YDR474C
342A07	YJL129C	1	0.27248		104.28		95.65		1	46.257	43.0989	48.45	50.11	42.48	YJL129C	TRK1		Component of the Trk1p-Trk2p potassium transport system; 180 kDa high affinity potassium transporter; phosphorylated in vivo and interacts physically with the phosphatase Ppz1p, suggesting Trk1p acitivy is regulated by phosphorylation
308B01	YPL274W	1	0.272531		103.1		95.81		1	42.2322	38.7924	45.95	48.22	37.91	YPL274W	SAM3		High-affinity S-adenosylmethionine permease, required for utilization of S-adenosylmethionine as a sulfur source; has similarity to S-methylmethionine permease Mmp1p
340H12	YIR013C	1	0.272533		103.34		94.33		1	41.881	38.2408	45.49	47.9	50.7	YIR013C	GAT4		Protein containing GATA family zinc finger motifs
314B08	YHR048W	1	0.272539		96.28		87.66		1	43.1337	40.1944	50.73	53.22	52.51	YHR048W	YHK8		Presumed antiporter of the DHA1 family of multidrug resistance transporters; contains 12 predicted transmembrane spans; expression of gene is up-regulated in cells exhibiting reduced susceptibility to azoles
331E07	YPR029C	1	0.272621		108.48		100.3		1	45.1977	41.6297	50.44	53.26	55.27	YPR029C	APL4		Gamma-adaptin, large subunit of the clathrin-associated protein (AP-1) complex; binds clathrin; involved in vesicle mediated transport
325G12	YNL219C	1	0.272727		101.75		93.02		1	45.1034	41.6297	56.54	56.61	51.6	YNL219C	ALG9		Mannosyltransferase, involved in N-linked glycosylation; catalyzes the transfer of mannose from Dol-P-Man to lipid-linked oligosaccharides; mutation of the human ortholog causes type 1 congenital disorders of glycosylation
345B04	YBR156C	1	0.272748		101.33		92.18		1	44.01	41.0516	46.33	47.71	47.94	YBR156C	SLI15		Subunit of the conserved chromosomal passenger complex (CPC; Ipl1p-Sli15p-Bir1p-Nbl1p), which regulates kinetochore-microtubule attachments, activation of the spindle tension checkpoint, and mitotic spindle disassembly
320C06	YLR410W	1	0.272778		84.05		77.7		1	41.9672	38.7924	61.28	52.47	55.25	YLR410W	VIP1		Inositol hexakisphosphate (IP6) and inositol heptakisphosphate (IP7) kinase; IP7 production is important for phosphate signaling; involved in cortical actin cytoskeleton function, and invasive pseudohyphal growth analogous to S. pombe asp1
315D08	YCL045C	1	0.272825		101.58		90.16		1	44.1745	41.0516	46.77	49.22	47.05	YCL045C	EMC1		Member of a transmembrane complex required for efficient folding of proteins in the ER; null mutant displays induction of the unfolded protein response; interacts with Gal80p
331F06	YPR049C	1	0.272832		113.67		104.2		1	57.2243	52.645	53.57	54.71	47.94	YPR049C	ATG11	CVT9	Adapter protein for pexophagy and the cytoplasm-to-vacuole targeting (Cvt) pathway; directs receptor-bound cargo to the phagophore assembly site (PAS) for packaging into vesicles; required for recruiting other proteins to the (PAS)
315D07	YCL044C	1	0.272883		101.51		89.21		1	44.7104	41.6297	48.71	50.97	47.05	YCL044C	MGR1		Subunit of the mitochondrial (mt) i-AAA protease supercomplex, which degrades misfolded mitochondrial proteins; forms a subcomplex with Mgr3p that binds to substrates to facilitate proteolysis; required for growth of cells lacking mtDNA
342F07	YBR287W	1	0.272946		98.28		88.9		1	43.4521	40.1944	49.22	51.87	53.43	YBR287W		ZSP1	Protein of unknown function; green fluorescent protein (GFP)-fusion protein localizes to the ER; YBR287W is not an essential gene
316G02	YKL041W	1	0.27297		104.78		98.33		1	48.9821	44.6022	49.75	56.08	26.93	YKL041W	VPS24	VPL26 DID3	One of four subunits of the endosomal sorting complex required for transport III (ESCRT-III); forms an ESCRT-III subcomplex with Did4p; involved in the sorting of transmembrane proteins into the multivesicular body (MVB) pathway
317A03	YKL072W	1	0.273083		104.7		97.03		1	44.2507	41.0516	63.85	65.69	62.55	YKL072W	STB6		Protein that binds Sin3p in a two-hybrid assay
326D03	YKL217W	1	0.273112		95.06		87.05		1	44.7391	41.0516	42.71	44.24	26.93	YKL217W	JEN1		Lactate transporter, required for uptake of lactate and pyruvate; phosphorylated; expression is derepressed by transcriptional activator Cat8p during respiratory growth, and repressed in the presence of glucose, fructose, and mannose
347H10	YIL111W	1	0.273115		112.42		102.32		1	44.1223	40.1944	53.7	54.4	50.7	YIL111W	COX5B		Subunit Vb of cytochrome c oxidase, which is the terminal member of the mitochondrial inner membrane electron transport chain; predominantly expressed during anaerobic growth while its isoform Va (Cox5Ap) is expressed during aerobic growth
304B06	YMR169C	1	0.273155		112.28		102.14		1	50.3268	45.2132	46.58	49.29	50.7	YMR169C	ALD3		Cytoplasmic aldehyde dehydrogenase, involved in beta-alanine synthesis; uses NAD+ as the preferred coenzyme; very similar to Ald2p; expression is induced by stress and repressed by glucose
330F10	YPL134C	1	0.273175		100.46		91.46		1	42.3514	38.7924	54.78	56.29	53.43	YPL134C	ODC1	2-oxodicarboxylate transporter	Mitochondrial inner membrane transporter, exports 2-oxoadipate and 2-oxoglutarate from the mitochondrial matrix to the cytosol for lysine and glutamate biosynthesis and lysine catabolism; suppresses, in multicopy, an fmc1 null mutation
307A01	YOR338W	1	0.273309		99.72		89.45		1	43.7938	39.6296	54.26	54.88	51.6	YOR338W			Putative protein of unknown function; YOR338W transcription is regulated by Azf1p and its transcript is a specific target of the G protein effector Scp160p; identified as being required for sporulation in a high-throughput mutant screen
317H12	YOR109W	1	0.273439		82.73		76.1		1	43.757	40.1944	53.05	53.81	46.11	YOR109W	INP53	SJL3 SOP2	Polyphosphatidylinositol phosphatase, dephosphorylates multiple phosphatidylinositols; involved in trans Golgi network-to-early endosome pathway; hyperosmotic stress causes translocation to actin patches; contains Sac1 and 5-ptase domains
324G07	YBL047C	1	0.273471		87.94		79.06		1	50.5345	46.1401	54.71	58.56	67.11	YBL047C	EDE1	BUD15	Key endocytic protein involved in a network of interactions with other endocytic proteins, binds membranes in a ubiquitin-dependent manner, may also bind ubiquitinated membrane-associated proteins
345C07	YDL010W	1	0.273534		101.58		92.97		1	45.612	42.5071	48.58	50.73	47.05	YDL010W	GRX6		Cis-golgi localized monothiol glutaredoxin that binds an iron-sulfur cluster; more similar in activity to dithiol than other monothiol glutaredoxins; involved in the oxidative stress response; functional overlap with GRX7
343C07	YOR364W	1	0.273535		101.1		93.44		1	55.5418	52.645	53.33	55.44	51.6	YOR364W
346D12	YDR520C	1	0.273552		107.08		98.39		1	46.1228	42.5071	49.09	50.73	45.21	YDR520C	URC2	RRT4	Putative Zn(II)2Cys6 motif containing transcription factor; non-essential gene identified in a screen for mutants with increased levels of rDNA transcription; similar to S. kluyveri Urc2p involved in uracil catabolism
346B11	YDR485C	1	0.273626		110.07		101.96		1	42.3076	38.7924	53.43	54.6	48.87	YDR485C	VPS72	SWC2	Htz1p-binding component of the SWR1 complex, which exchanges histone variant H2AZ (Htz1p) for chromatin-bound histone H2A; required for vacuolar protein sorting
347C07	YER120W	1	0.273709		110.43		100.08		1	43.5347	39.6296	48.71	50.63	44.3	YER120W	SCS2		Integral ER membrane protein that regulates phospholipid metabolism via an interaction with the FFAT motif of Opi1p, also involved in telomeric silencing, disruption causes inositol auxotrophy above 34 degrees C, VAP homolog
333A03	YOL163W	1	0.273821		96.8		87.03		1	45.2359	41.6297	69.23	58.24	49.78	YOL163W			Putative protein of unknown function; member of the Dal5p subfamily of the major facilitator family
346A01	YDR451C	1	0.27388		90.5		83.5		1	43.512	40.1944	48.38	50.04	49.78	YDR451C	YHP1		One of two homeobox transcriptional repressors (see also Yox1p), that bind to Mcm1p and to early cell cycle box (ECB) elements of cell cycle regulated genes, thereby restricting ECB-mediated transcription to the M/G1 interval
318A06	YOR118W	1	0.273889		89.35		83.01		1	43.263	40.1944	47.78	48.74	47.94	YOR118W	RTC5		Protein of unknown function; green fluorescent protein (GFP)-fusion protein localizes to the cytoplasm; null mutation suppresses cdc13-1 temperature sensitivity
315C03	YCL014W	1	0.273921		88.24		80.48		1	47.9831	44.6022	49.78	52.17	50.7	YCL014W	BUD3	YCL012W	Protein involved in bud-site selection and required for axial budding pattern; localizes with septins to bud neck in mitosis and may constitute an axial landmark for next round of budding
316H03	YKL057C	1	0.273924		117.05		106.72		16.2	48.4788	43.0989	47.4	46.8	35.17	YKL057C	NUP120	RAT2	Subunit of the Nup84p subcomplex of the nuclear pore complex (NPC), required for even distribution of NPCs around the nuclear envelope, involved in establishment of a normal nucleocytoplasmic concentration gradient of the GTPase Gsp1p
345H06	YDR441C	1	0.273947		95.01		88.12		1	41.5677	38.2408	48.93	50.57	49.78	YDR441C	APT2		Apparent pseudogene, not transcribed or translated under normal conditions; encodes a protein with similarity to adenine phosphoribosyltransferase, but artificially expressed protein exhibits no enzymatic activity
343D12	YJR003C	1	0.274057		103.63		94.39		1	43.1479	40.1944	45.64	47.74	45.21	YJR003C			Putative protein of unknown function; detected in highly purified mitochondria in high-throughput studies; predicted to be involved in ribosome biogenesis
304D10	YMR205C	1	0.274092		78.27		71.79		16.7	42.2438	38.2408	47.84	50.97	45.21	YMR205C	PFK2		Beta subunit of heterooctameric phosphofructokinase involved in glycolysis, indispensable for anaerobic growth, activated by fructose-2,6-bisphosphate and AMP, mutation inhibits glucose induction of cell cycle-related genes
344B10	YPR064W	1	0.274174		98.86		93		1	47.2153	43.9967	49.03	50.73	46.11	YPR064W
317A02	YKL071W	1	0.274205		106.52		98.51		1	45.0802	42.5071	49.97	52.68	53.43	YKL071W			Putative protein of unknown function; expression induced in cells treated with the mycotoxin patulin, and also the quinone methide triterpene celastrol; green fluorescent protein (GFP)-fusion protein localizes to the cytoplasm
327E03	YDR330W	1	0.274278		101.56		91.38		1	45.3959	41.6297	57.01	58.23	54.36	YDR330W	UBX5		UBX (ubiquitin regulatory X) domain-containing protein that interacts with Cdc48p
301E11	YAR028W	2	0.27432	0.0588698	104.685	12.5794	97.485	10.0904	1	44.1651	40.1944	53.98	56.12	39.71	YAR028W			Putative integral membrane protein, member of DUP240 gene family; GFP-fusion protein is induced in response to the DNA-damaging agent MMS
333B02	YJR103W	1	0.274342		96.26		87.04		1	46.8073	43.9967	50.01	52	39.71	YJR103W	URA8		Minor CTP synthase isozyme (see also URA7), catalyzes the ATP-dependent transfer of the amide nitrogen from glutamine to UTP, forming CTP, the final step in de novo biosynthesis of pyrimidines; involved in phospholipid biosynthesis
314H09	YHR176W	3	0.274418	0.0782863	104.787	4.37054	96.27	5.38145	1	42.3132	38.7924	46.42	48.32	48.87	YHR176W	FMO1		Flavin-containing monooxygenase, localized to the cytoplasmic face of the ER membrane; catalyzes oxidation of biological thiols to maintain the ER redox buffer ratio for correct folding of disulfide-bonded proteins
332A08	YJL123C	2	0.274428	0.0939737	93.15	14.5381	85.685	13.7815	1	49.8594	45.2132	54.78	55.51	50.7	YJL123C	MTC1		Protein of unknown function that may interact with ribosomes; green fluorescent protein (GFP)-fusion protein localizes to the cytoplasm and to COPI-coated vesicles (early Golgi); mtc1 is synthetically lethal with cdc13-1
322H05	YPL026C	2	0.274636	0.0945748	99.43	5.85484	90.56	5.9397	1	42.8157	38.7924	53.72	55.52	36.07	YPL026C	SKS1	SHA3	Putative serine/threonine protein kinase; involved in the adaptation to low concentrations of glucose independent of the SNF3 regulated pathway
341D03	YNL066W	1	0.274662		103.01		94.94		1	47.4589	43.9967	47.52	49.94	52.51	YNL066W	SUN4	SCW3	Cell wall protein related to glucanases, possibly involved in cell wall septation; member of the SUN family
307C09	YOR381W	1	0.27472		101.84		91.98		1	42.9816	39.6296	47.71	49.65	45.21	YOR381W	FRE3		Ferric reductase, reduces siderophore-bound iron prior to uptake by transporters; expression induced by low iron levels
323B02	YPR109W	1	0.274729		98.7		91.27		1	45.3171	41.6297	56.47	57.65	48.87	YPR109W			Predicted membrane protein; dipoid deletion strain has high budding index
308D10	YPL227C	1	0.274775		96.01		87.72		1	45.0542	41.6297	43.88	49.94	15.98	YPL227C	ALG5		UDP-glucose:dolichyl-phosphate glucosyltransferase, involved in asparagine-linked glycosylation in the endoplasmic reticulum
347E09	YER158C	1	0.274851		106.84		97.31		1	45.9134	42.5071	49.84	51.8	47.05	YER158C			Protein of unknown function, has similarity to Afr1p; potentially phosphorylated by Cdc28p
307E04	YOL018C	1	0.274861		93.23		84.49		1	42.5697	38.7924	42.95	45.27	30.58	YOL018C	TLG2		Syntaxin-like t-SNARE that forms a complex with Tlg1p and Vti1p and mediates fusion of endosome-derived vesicles with the late Golgi; binds Vps45p, which prevents Tlg2p degradation and also facilitates t-SNARE complex formation
339H09	YBR033W	1	0.274876		102		92.69		1	43.5172	40.1944	46.06	49.33	44.3	YBR033W	EDS1		Putative zinc cluster protein; YBR033W is not an essential gene
325H08	YNL205C	1	0.274973		107.79		96.53		1	44.1887	41.0516	58.05	58.71	54.36	YNL205C
342E10	YBR131W	1	0.275003		99.14		89.86		1	46.8671	43.9967	51.06	53.91	50.7	YBR131W	CCZ1	CVT16	Protein involved in vacuolar assembly, essential for autophagy and the cytoplasm-to-vacuole pathway
308C03	YPL257W	1	0.275022		107.35		98.56		1	43.7454	40.1944	53.03	48.87	26.03	YPL257W			Putative protein of unknown function; homozygous diploid deletion strain exhibits low budding index; physically interacts with Hsp82p; YPL257W is not an essential gene
304A03	YMR152W	1	0.275026		147.29		137.02		1	44.0614	40.1944	62.24	66.46	65.31	YMR152W	YIM1		Protein of unknown function; null mutant displays sensitivity to DNA damaging agents; the authentic, non-tagged protein is detected in highly purified mitochondria in high-throughput studies
331E06	YPR028W	1	0.275044		108.4		100.09		1	44.0789	41.0516	56.22	58.3	55.27	YPR028W	YOP1	YIP2	Membrane protein that interacts with Yip1p to mediate membrane traffic; interacts with Sey1p to maintain ER morphology; overexpression leads to cell death and accumulation of internal cell membranes
308D08	YPL230W	1	0.275069		105.03		96.73		1	43.6322	40.1944	53.13	48.59	31.51	YPL230W	USV1	NSF1	Putative transcription factor containing a C2H2 zinc finger; mutation affects transcriptional regulation of genes involved in growth on non-fermentable carbon sources, response to salt stress and cell wall biosynthesis
320D11	YLR242C	1	0.275076		80.34		75.39		20.1	48.7157	44.6022	64.4	67.18	40.64	YLR242C	ARV1		Protein functioning in transport of glycosylphosphatidylinositol intermediates into ER lumen; required for normal intracellular sterol distribution; human ARV1 required for normal cholesterol and bile acid homeostasis; similar to Nup120p
322H08	YPL022W	1	0.275079		106.86		96.6		1	46.4403	42.5071	54.5	54.74	51.6	YPL022W	RAD1	LPB9	Single-stranded DNA endonuclease (with Rad10p), cleaves single-stranded DNA during nucleotide excision repair and double-strand break repair; subunit of Nucleotide Excision Repair Factor 1 (NEF1); homolog of human XPF protein
311A06	YDR349C	1	0.275089		101.44		92.37		1	44.5796	41.0516	49.03	51.2	49.78	YDR349C	YPS7		Putative GPI-anchored aspartic protease, member of the yapsin family of proteases involved in cell wall growth and maintenance; located in the cytoplasm and endoplasmic reticulum
346F12	YGL127C	1	0.275093		125.69		103.37		3.8	39.5483	37.4233	46.33	47.4	43.4	YGL127C	SOH1	MED31	Subunit of the RNA polymerase II mediator complex; associates with core polymerase subunits to form the RNA polymerase II holoenzyme; involved in telomere maintenance; conserved with other metazoan MED31 subunits
331H12	YPR095C	1	0.275103		104.24		95.83		1	46.2785	43.0989	62.32	62.97	47.94	YPR095C	SYT1		Guanine nucleotide exchange factor (GEF) for Arf proteins; promotes activation of Arl1p, which recruits Imh1p to the Golgi; involved in vesicular transport; member of the Sec7-domain family; contains a PH domain
339F04	YBL104C	1	0.275153		105.26		95.88		1	46.3175	41.6297	39.28	43.9	10.5	YBL104C	SEA4	YBL103C-A	Subunit of the SEA (Seh1-associated) complex, a coatomer-related complex that associates dynamically with the vacuole; has an N-terminal beta-propeller fold and a C-terminal RING motif; promoter contains multiple GCN4 binding sites
339A01	YNL009W	1	0.275154		104.58		96.13		1	43.5095	40.1944	41.79	45.36	29.68	YNL009W	IDP3		Peroxisomal NADP-dependent isocitrate dehydrogenase, catalyzes oxidation of isocitrate to alpha-ketoglutarate with the formation of NADP(H+), required for growth on unsaturated fatty acids
304D11	YMR206W	1	0.275161		92.87		84.92		1	43.9215	41.0516	45.89	48.29	44.3	YMR206W			Putative protein of unknown function; YMR206W is not an essential gene
346E08	YDR534C	1	0.275262		103.79		95.76		1	44.5529	41.6297	56.83	56.79	55.27	YDR534C	FIT1		Mannoprotein that is incorporated into the cell wall via a glycosylphosphatidylinositol (GPI) anchor, involved in the retention of siderophore-iron in the cell wall
307E05	YOL019W	1	0.275331		101.11		92.25		1	54.6969	50.965	54.02	54.85	46.11	YOL019W		TOS7	Protein of unknown function; green fluorescent protein (GFP)-fusion protein localizes to the cell periphery and vacuole
337C08	YDL184C	1	0.275364		95.21		85.69		1	43.4484	39.6296	49.26	50.8	49.78	YDL184C	RPL41A	RPL47A L41A YL41 L47A	Ribosomal protein L47 of the large (60S) ribosomal subunit, identical to Rpl41Bp and has similarity to rat L41 ribosomal protein; comprised of only 25 amino acids; rpl41a rpl41b double null mutant is viable
307D07	YOL006C	2	0.275425	0.017623	87.26	12.2895	79.455	10.048	1	49.103	43.9967	49.09	51.5	52.51	YOL006C	TOP1	MAK1 MAK17	Topoisomerase I, nuclear enzyme that relieves torsional strain in DNA by cleaving and re-sealing the phosphodiester backbone; relaxes both positively and negatively supercoiled DNA; functions in replication, transcription, and recombination
332A09	YJL122W	1	0.275455		100.87		93.25		1	42.6063	39.6296	57.08	55.83	47.94	YJL122W	ALB1		Shuttling pre-60S factor; involved in the biogenesis of ribosomal large subunit; interacts directly with Arx1p; responsible for Tif6p recycling defects in absence of Rei1p
325H06	YNL211C	1	0.27551		107.23		96.8		1	44.0162	40.1944	55.9	57.91	53.43	YNL211C			Putative protein of unknown function; green fluorescent protein (GFP)-fusion protein localizes to mitochondria; YNL211C is not an essential gene
336D11	YJR036C	1	0.275579		100.77		91.48		1	42.8343	39.6296	50.87	53.16	51.6	YJR036C	HUL4		Protein with similarity to hect domain E3 ubiquitin-protein ligases, not essential for viability
343D09	YIR032C	1	0.275586		99.95		90.35		1	42.5553	39.6296	48.35	50.37	49.78	YIR032C	DAL3		Ureidoglycolate hydrolase, converts ureidoglycolate to glyoxylate and urea in the third step of allantoin degradation; expression sensitive to nitrogen catabolite repression
318E03	YOR197W	1	0.275642		98.46		91.79		1	44.3515	41.0516	65.46	56.52	52.51	YOR197W	MCA1	YCA1 [MCA]	Putative cysteine protease similar to mammalian caspases; involved in regulation of apoptosis upon H2O2 treatment; contributes to clearance of insoluble protein aggregates during normal growth; may be involved in cell cycle progression
342G02	YCR030C	1	0.275712		103.78		93.96		1	46.3861	43.0989	53.84	58.52	59.81	YCR030C	SYP1	YCR029C-A	Protein of unknown function that is involved in endocytic site formation; may regulate assembly and disassembly of the septin ring; colocalizes and interacts with septin subunits; potential role in actin cytoskeletal organization
323H03	YDL130W-A	1	0.275819		99.03		89.74		1	43.8753	40.1944	53.09	54.81	55.27	YDL130W-A	STF1	AIS2	Protein involved in regulation of the mitochondrial F1F0-ATP synthase; Stf1p and Stf2p may act as stabilizing factors that enhance inhibitory action of the Inh1p protein
339G06	YBR016W	1	0.275983		97.53		88.71		1	42.4778	39.6296	42.71	48.93	9.592	YBR016W			Tail-anchored plasma membrane protein containing a conserved CYSTM module; predicted to be palmitoylated; has similarity to hydrophilins, which are involved in the adaptive response to hyperosmotic conditions
331H08	YPR089W	1	0.27599		97.84		90.02		1	44.929	41.6297	59.33	59.22	55.27	YPR089W		YPR090W	Protein of unknown function; exhibits genetic interaction with ERG11 and protein-protein interaction with Hsp82p
339B03	YNL035C	1	0.276		98.25		90.43		1	42.5908	39.6296	49	50.62	48.87	YNL035C			Putative protein of unknown function with similarity to proteins containing WD-40 domains; green fluorescent protein (GFP)-fusion protein localizes to the nucleus; YNL035C is not an essential gene
338B03	YNL058C	1	0.276106		101.18		94.47		1	41.6321	38.2408	46.21	49.62	47.04	YNL058C			Putative protein of unknown function; green fluorescent protein (GFP)-fusion protein localizes to the vacuole; YNL058C is not an essential gene
314E03	YHR109W	1	0.276249		89.86		82.49		1	41.5743	38.7924	51.8	54.78	58.93	YHR109W	CTM1		Cytochrome c lysine methyltransferase, trimethylates residue 72 of apo-cytochrome c (Cyc1p) in the cytosol; not required for normal respiratory growth
301E03	YAR002W	1	0.276301		122.79		115.09		3	48.8701	43.9967	54.85	60.07	37.91	YAR002W	NUP60		Subunit of the nuclear pore complex (NPC), functions to anchor Nup2p to the NPC in a process controlled by the nucleoplasmic concentration of Gsp1p-GTP; involved in nuclear export and cytoplasmic localization of specific mRNAs such as ASH1
317H03	YKL190W	1	0.276332		80.18		73.79		1	43.4585	40.1944	44.54	47.65	47.94	YKL190W	CNB1	CRV1 YCN2	Calcineurin B; the regulatory subunit of calcineurin, a Ca++/calmodulin-regulated type 2B protein phosphatase which regulates Crz1p (a stress-response transcription factor), the other calcineurin subunit is encoded by CNA1 and/or CMP1
314A09	YHR033W	1	0.276367		97.28		88.62		1	42.9617	39.6296	48.9	50.83	44.3	YHR033W			Putative protein of unknown function; epitope-tagged protein localizes to the cytoplasm
347H12	YIL131C	1	0.276429		106.7		96.77		1	43.7717	40.1944	53.64	55.76	51.6	YIL131C	FKH1		Forkhead family transcription factor with a minor role in the expression of G2/M phase genes; negatively regulates transcriptional elongation; positive role in chromatin silencing at HML and HMR; regulates donor preference during switching
344C06	YFR025C	1	0.276479		94.92		89.1		1	41.9719	38.7924	49.09	51.7	42.48	YFR025C	HIS2		Histidinolphosphatase, catalyzes the eighth step in histidine biosynthesis; mutations cause histidine auxotrophy and sensitivity to Cu, Co, and Ni salts; transcription is regulated by general amino acid control
332H11	YOL158C	1	0.27653		99.5		91.28		1	46.4606	43.0989	52.58	53.98	47.05	YOL158C	ENB1	ARN4	Endosomal ferric enterobactin transporter, expressed under conditions of iron deprivation; member of the major facilitator superfamily; expression is regulated by Rcs1p and affected by chloroquine treatment
301H04	YLL028W	2	0.276567	0.0801536	105.275	11.7309	98.52	10.8329	1	41.3464	37.4233	52.24	53.26	40.65	YLL028W	TPO1		Polyamine transporter that recognizes spermine, putrescine, and spermidine; catalyzes uptake of polyamines at alkaline pH and excretion at acidic pH; phosphorylation enhances activity and sorting to the plasma membrane
323A10	YPR003C	1	0.276635		99.57		91.37		1	42.9236	39.6296	52.37	52.88	47.94	YPR003C			Putative sulfate permease; physically interacts with Hsp82p; green fluorescent protein (GFP)-fusion protein localizes to the ER; YPR003C is not an essential gene
334A11	YAL058C-A	1	0.276702		89.64		84.8		1	47.6086	42.5071	51.2	52.24	49.78	YAL058C-A
333G11	YMR158C-B	1	0.276733		106.14		95.6		1	43.7008	40.1944	60.03	59.29	50.7	YMR158C-B
336E10	YJR053W	1	0.276765		98.7		88.93		1	43.6452	40.1944	61.01	60.83	52.51	YJR053W	BFA1	IBD1	Component of the GTPase-activating Bfa1p-Bub2p complex involved in multiple cell cycle checkpoint pathways that control exit from mitosis
328B01	YFL025C	1	0.276813		87.31		78.96		5.8	44.8064	41.0516	51.8	53.46	48.87	YFL025C	BST1	PER17	GPI inositol deacylase of the ER that negatively regulates COPII vesicle formation, prevents production of vesicles with defective subunits, required for proper discrimination between resident ER proteins and Golgi-bound cargo molecules
345A07	YBR139W	1	0.276846		102.08		94.23		1	42.3507	39.6296	45.58	47.74	48.87	YBR139W			Putative serine type carboxypeptidase with a role in phytochelatin synthesis; green fluorescent protein (GFP)-fusion protein localizes to the vacuole; expression induced by nitrogen limitation in a GLN3, GAT1-independent manner
339D06	YNR028W	1	0.276858		99.56		92.26		1	44.4996	41.0516	49.84	52.88	57.09	YNR028W	CPR8		Peptidyl-prolyl cis-trans isomerase (cyclophilin), catalyzes the cis-trans isomerization of peptide bonds N-terminal to proline residues; similarity to Cpr4p suggests a potential role in the secretory pathway
339D10	YNR032W	1	0.276907		97.85		90.29		1	44.4601	41.6297	50.12	53.75	46.12	YNR032W	PPG1		Putative serine/threonine protein phosphatase of the type 2A-like phosphatase family, required for glycogen accumulation; interacts with Tap42p, which binds to and regulates other protein phosphatases
332B07	YJL108C	1	0.276957		103.94		93.58		1	42.7082	40.1944	49.78	52.27	48.87	YJL108C	PRM10		Pheromone-regulated protein, proposed to be involved in mating; predicted to have 5 transmembrane segments; induced by treatment with 8-methoxypsoralen and UVA irradiation
303G08	YMR030W	1	0.276992		104.65		97.8		1	46.2551	43.0989	45	48	46.11	YMR030W	RSF1		Protein required for respiratory growth; localized to both the nucleus and mitochondrion; may interact with transcription factors to mediate the transition to respiratory growth and activate transcription of nuclear and mitochondrial genes
332E06	YJL049W	1	0.277062		103.59		93.82		1	44.9973	41.6297	49.81	52.31	47.94	YJL049W			Putative protein of unknown function; YJL049W is a non-essential gene
303F05	YMR011W	1	0.277108		105.27		99.22		1	43.8868	40.1944	46.05	48.84	48.87	YMR011W	HXT2		High-affinity glucose transporter of the major facilitator superfamily, expression is induced by low levels of glucose and repressed by high levels of glucose
345C12	YDL020C	1	0.277112		99.77		90.89		1	49.6854	45.2132	46.45	48.29	40.65	YDL020C	RPN4	UFD5 SON1	Transcription factor that stimulates expression of proteasome genes; Rpn4p levels are in turn regulated by the 26S proteasome in a negative feedback control mechanism; RPN4 is transcriptionally regulated by various stress responses
308E03	YPL221W	1	0.277117		98.8		89.92		1	42.4786	39.6296	54.1	50.79	48.87	YPL221W	FLC1	HUF1 BOP1	Putative FAD transporter; required for uptake of FAD into endoplasmic reticulum; involved in cell wall maintenance
332G12	YHR131C	1	0.277125		99.52		91.4		1	49.6047	44.6022	52.71	52.88	52.51	YHR131C			Putative protein of unknown function; green fluorescent protein (GFP)-fusion protein localizes to the cytoplasm; overexpression causes a cell cycle delay or arrest
339F02	YBL101C	1	0.277129		102.57		93.29		1	44.2758	40.1944	44.38	46.92	39.73	YBL101C	ECM21	ART2	Protein involved in regulating the endocytosis of plasma membrane proteins; identified as a substrate for ubiquitination by Rsp5p and deubiquitination by Ubp2p; promoter contains several Gcn4p binding elements
326C06	YKL200C	1	0.277239		94.89		87.82		1	45.3816	42.5071	48.45	51.37	47.05	YKL200C
342C12	YKR010C	1	0.277297		101		91.92		1	43.3225	39.6296	44.88	47.71	47.94	YKR010C	TOF2		Protein required for rDNA silencing and mitotic rDNA condensation; stimulates Cdc14p phosphatase activity and biphasic release to promote rDNA repeat segregation; required for condensin recruitment to the replication fork barrier site
332B09	YJL106W	1	0.277457		101.67		91.39		1	42.8871	40.1944	46.73	50.01	54.36	YJL106W	IME2	SME1	Serine/threonine protein kinase involved in activation of meiosis, associates with Ime1p and mediates its stability, activates Ndt80p; IME2 expression is positively regulated by Ime1p
323H07	YDR536W	1	0.277674		100.87		91.88		1	43.8583	41.0516	54.85	56.26	49.78	YDR536W	STL1		Glycerol proton symporter of the plasma membrane, subject to glucose-induced inactivation, strongly but transiently induced when cells are subjected to osmotic shock
330E09	YMR316W	1	0.277693		96.44		87.52		1	41.8398	38.2408	44.33	46.14	44.3	YMR316W	DIA1		Protein of unknown function, involved in invasive and pseudohyphal growth; green fluorescent protein (GFP)-fusion protein localizes to the cytoplasm in a punctate pattern
346D08	YDR516C	1	0.277848		54.41		51.24		1	44.4398	41.0516	32.36	32.79	26.94	YDR516C	EMI2		Non-essential protein of unknown function required for transcriptional induction of the early meiotic-specific transcription factor IME1; required for sporulation; expression is regulated by glucose-repression transcription factors Mig1/2p
322H09	YPL021W	1	0.277928		100.61		89.61		1	43.6319	40.1944	57.01	57.58	50.7	YPL021W	ECM23	SRD2	Non-essential protein of unconfirmed function; affects pre-rRNA processing, may act as a negative regulator of the transcription of genes involved in pseudohyphal growth; homologous to Srd1p
328E06	YFR026C	1	0.277967		96.43		86.3		1	42.942	39.6296	47.17	50.4	45.21	YFR026C	ULI1		Putative protein of unknown function involved in and induced by the endoplasmic reticulum unfolded protein response
307E07	YOL024W	2	0.278155	0.0616741	91.97	11.8935	83.495	11.0804	1	46.7487	42.5071	50.9	52.71	47.05	YOL024W			Putative protein of unknown function; predicted to have thiol-disulfide oxidoreductase active site
301G10	YLL021W	2	0.278193	0.0641873	94.335	10.4157	88.495	10.5288	1	46.2092	43.0989	55.16	57.11	48.87	YLL021W	SPA2	FUS6 PEA1	Component of the polarisome, which functions in actin cytoskeletal organization during polarized growth; acts as a scaffold for Mkk1p and Mpk1p cell wall integrity signaling components; potential Cdc28p substrate
346G04	YGL133W	1	0.27822		98.35		91.01		1	41.9541	38.7924	46.26	47.97	47.94	YGL133W	ITC1		Component of the ATP-dependent Isw2p-Itc1p chromatin remodeling complex, required for repression of a-specific genes, repression of early meiotic genes during mitotic growth, and repression of INO1
325E05	YGL060W	1	0.278274		111.47		102.78		1	54.0684	50.3031	64.86	68.04	57.08	YGL060W	YBP2		Central kinetochore associated protein that mediates mitotic progression; interacts with several central kinetochore proteins and the centromeric histone Cse4p; role in resistance to oxidative stress; similarity to Ybp1p and Slk19p
318C06	YOR164C	1	0.278276		92.37		86.28		3.2	43.4964	40.1944	47.68	51.3	51.6	YOR164C	GET4		Protein with a role in insertion of tail-anchored proteins into the ER membrane; forms a complex with Mdy2p; highly conserved across species and homologous to human gene C7orf20
339E07	YNR048W	1	0.278277		99.13		90.46		1	43.5616	40.1944	51.63	53.6	47.95	YNR048W		CRF1	Protein that interacts specifically in vivo with phospholipid translocase (flippase) Dnf3p; similar to Cdc50p, which is an essential interaction partner of the flippase Drs2p
327E09	YIL002C	1	0.278337		101.49		91.18		1	43.0238	40.1944	52.14	54.22	47.94	YIL002C	INP51	SJL1	Phosphatidylinositol 4,5-bisphosphate 5-phosphatase, synaptojanin-like protein with an N-terminal Sac1 domain, plays a role in phosphatidylinositol 4,5-bisphosphate homeostasis and in endocytosis; null mutation confers cold-tolerant growth
345E12	YDL065C	1	0.278379		104.85		95.99		1	44.5073	41.6297	51.83	53.12	53.43	YDL065C	PEX19	PAS12	Chaperone and import receptor for newly-synthesized class I peroxisomal membrane proteins (PMPs), binds PMPs in the cytoplasm and delivers them to the peroxisome for subsequent insertion into the peroxisomal membrane
331A11	YML128C	1	0.278427		95.64		85.23		1	44.8941	41.0516	49.32	51	47.05	YML128C	MSC1		Protein of unknown function; mutant is defective in directing meiotic recombination events to homologous chromatids; the authentic, non-tagged protein is detected in highly purified mitochondria and is phosphorylated
327G06	YIL040W	1	0.278431		99.87		89.83		7.2	57.1547	53.3272	60.03	63.74	25.11	YIL040W	APQ12		Protein required for nuclear envelope morphology, nuclear pore complex localization, mRNA export from the nucleus; exhibits synthetic lethal genetic interactions with genes involved in lipid metabolism
347F11	YER179W	1	0.278462		104.8		95.3		1	43.6461	40.1944	49.26	52.04	49.78	YER179W	DMC1	ISC2	Meiosis-specific protein required for repair of double-strand breaks and pairing between homologous chromosomes; homolog of Rad51p and the bacterial RecA protein
339C10	YNR018W	1	0.278581		101.58		93.9		1	44.5008	41.0516	64.86	71.58	9.592	YNR018W	AIM38		Putative protein of unknown function; non-tagged protein is detected in purified mitochondria; may interact with respiratory chain complex IV; null mutant is viable and displays reduced frequency of mitochondrial genome loss
314D11	YHR104W	1	0.278671		104.96		94.37		1	41.4918	39.6296	67.06	61.08	58.91	YHR104W	GRE3		Aldose reductase involved in methylglyoxal, d-xylose, arabinose, and galactose metabolism; stress induced (osmotic, ionic, oxidative, heat shock, starvation and heavy metals); regulated by the HOG pathway
339C08	YNR014W	1	0.278783		100.46		92.56		1	45.2978	41.6297	50.36	54.55	51.61	YNR014W			Putative protein of unknown function; expression is cell-cycle regulated, Azf1p-dependent, and heat-inducible
339B06	YNL044W	1	0.278881		100.87		93.33		1	43.3223	40.1944	45.2	49.41	22.38	YNL044W	YIP3		Protein localized to COPII vesicles, proposed to be involved in ER to Golgi transport; interacts with members of the Rab GTPase family and Yip1p; also interacts with Rtn1p
334D12	YJR109C	1	0.278885		98.38		91.43		1	45.9519	42.5071	50.24	52.07	48.87	YJR109C	CPA2		Large subunit of carbamoyl phosphate synthetase, which catalyzes a step in the synthesis of citrulline, an arginine precursor
346F11	YGL126W	1	0.278953		101.46		93.61		1	42.7292	39.6296	53.5	54.47	48.87	YGL126W	SCS3	FIT2B	Protein required for inositol prototrophy, identified as an ortholog of the FIT family of proteins involved in triglyceride droplet biosynthesis; disputed role in the synthesis of inositol phospholipids from inositol
303A05	YML084W	2	0.278961	0.0376322	102.725	15.4644	95.12	14.8068	1	43.4922	40.1944	49.03	51.03	44.3	YML084W
339D07	YNR029C	1	0.278972		96.71		88.89		1	42.3162	38.7924	48.55	52.51	32.42	YNR029C			Putative protein of unknown function, deletion confers reduced fitness in saline
347F03	YER169W	1	0.278973		106.5		95.59		1	42.2047	38.2408	51.67	54.95	44.3	YER169W	RPH1	KDM4	JmjC domain-containing histone demethylase which can specifically demethylate H3K36 tri- and dimethyl modification states; transcriptional repressor of PHR1; Rph1p phosphorylation during DNA damage is under control of the MEC1-RAD53 pathway
323C10	YPR138C	1	0.278997		99.89		91.32		1	45.707	41.6297	53.67	55.23	46.11	YPR138C	MEP3		Ammonium permease of high capacity and low affinity; belongs to a ubiquitous family of cytoplasmic membrane proteins that transport only ammonium (NH4+); expression is under the nitrogen catabolite repression regulation ammonia permease
332C11	YJL079C	1	0.279036		100.2		90.77		1	44.3584	41.0516	56.9	58.09	50.7	YJL079C	PRY1		Protein of unknown function
307D10	YOL011W	1	0.279091		97.59		87.89		1	47.2986	43.0989	50.07	51.53	47.94	YOL011W	PLB3		Phospholipase B (lysophospholipase) involved in phospholipid metabolism; hydrolyzes phosphatidylinositol and phosphatidylserine and displays transacylase activity in vitro
347G07	YER187W	1	0.279098		105.2		95.51		1	43.8125	40.1944	49.13	51.16	49.78	YER187W			Putative protein of unknown function; induced in respiratory-deficient cells
304A11	YMR159C	1	0.279105		107.86		98.61		1	44.1958	40.1944	46.48	48.61	47.05	YMR159C	ATG16	APG16 APG15 CVT11 SAP18	Conserved protein that interacts with Atg12p-Atg5p conjugates to form Atg12p-Atg5p-Atg16p multimers, which localize to the pre-autophagosomal structure and are required for autophagy
310F04	YDR108W	1	0.279109		94.84		87.74		1	46.7537	43.0989	49.58	52.37	43.4	YDR108W	TRS85	GSG1 MUM1	Subunit of TRAPPIII (transport protein particle), a multimeric guanine nucleotide-exchange factor for Ypt1p, required for membrane expansion during autophagy and the CVT pathway; directs Ypt1p to the PAS; late post-replication meiotic role
307G09	YOL054W	1	0.279207		117.55		108.45		1	43.5711	40.1944	56.55	45.55	38.81	YOL054W	PSH1		E3 ubiquitin ligase that mediates poyubiquitination and degradation of centromere-binding protein Cse4p and prevents Cse4p from mislocalizing to euchromatin; ubiquitylation of Cse4p may be antagonized by Scm3p
333F10	YLR449W	1	0.279312		97.51		88.39		1	43.3027	40.1944	47.71	51.63	21.46	YLR449W	FPR4		Peptidyl-prolyl cis-trans isomerase (PPIase) (proline isomerase) localized to the nucleus; catalyzes isomerization of proline residues in histones H3 and H4, which affects lysine methylation of those histones
345F12	YDL079C	1	0.279434		101.8		93.04		1	44.8721	41.0516	48.8	49.75	48.87	YDL079C	MRK1		Glycogen synthase kinase 3 (GSK-3) homolog; one of four GSK-3 homologs in S. cerevisiae that function to activate Msn2p-dependent transcription of stress responsive genes and that function in protein degradation
334D10	YJR106W	1	0.279452		100.3		93.73		1	46.8813	43.9967	51.26	53.95	52.51	YJR106W	ECM27		Putative protein of unknown function; may play a role in cell wall biosynthesis, mutants are hypersensitive to Papulacandin B; null mutants have increased plasmid loss; displays a two-hybrid interaction with Pdr5p
346E02	YDR524C	1	0.279532		100.92		93.55		1	44.8758	41.6297	48.77	50.34	47.05	YDR524C	AGE1	SAT1	ADP-ribosylation factor (ARF) GTPase activating protein (GAP) effector, involved in the secretory and endocytic pathways; contains C2C2H2 cysteine/histidine motif
342F11	YBR301W	1	0.279558		101.31		91.5		1	43.6278	40.1944	50.2	53.22	51.6	YBR301W	PAU24	DAN3	Cell wall mannoprotein with similarity to Tir1p, Tir2p, Tir3p, and Tir4p; member of the seripauperin multigene family encoded mainly in subtelomeric regions; expressed under anaerobic conditions, completely repressed during aerobic growth
340D03	YIL101C	1	0.279571		109.77		101.02		1	46.6356	42.5071	45.06	46.86	41.54	YIL101C	XBP1		Transcriptional repressor that binds to promoter sequences of the cyclin genes, CYS3, and SMF2; expression is induced by stress or starvation during mitosis, and late in meiosis; member of the Swi4p/Mbp1p family; potential Cdc28p substrate
308F12	YPL191C	1	0.279584		92.79		84.32		1	45.6269	42.5071	44.36	46.7	25.11	YPL191C			Putative protein of unknown function; diploid deletion strain exhibits high budding index; green fluorescent protein (GFP)-fusion protein localizes to the cytoplasm
339D11	YNR034W	1	0.279609		98.71		91.42		1	44.6861	41.6297	44.85	47.3	36.07	YNR034W	SOL1		Protein with a possible role in tRNA export; shows similarity to 6-phosphogluconolactonase non-catalytic domains but does not exhibit this enzymatic activity; homologous to Sol2p, Sol3p, and Sol4p
343G09	YFR030W	1	0.279687		104.67		97.19		1	42.9283	38.7924	48.32	50.8	47.94	YFR030W	MET10		Subunit alpha of assimilatory sulfite reductase, which converts sulfite into sulfide
332C07	YJL083W	1	0.279703		101.57		91.84		1	43.339	39.6296	52.65	55.3	59.81	YJL083W	TAX4		EH domain-containing protein involved in regulating phosphatidylinositol 4,5-bisphosphate levels and autophagy; Irs4p and Tax4p bind and activate the PtdIns phosphatase Inp51p; Irs4p and Tax4p are involved in localizing Atg17p to the PAS
311A10	YDR357C	1	0.279704		108.35		100.39		1	45.0431	42.5071	53.5	55.8	54.36	YDR357C	CNL1	BLC1	Protein of unknown function; likely member of BLOC complex involved in endosomal cargo sorting; null mutant is sensitive to drug inducing secretion of vacuolar cargo; green fluorescent protein (GFP)-fusion protein localizes to the cytoplasm
338E01	YIL010W	1	0.279717		101.74		94.41		1	44.3695	41.0516	39.65	42.45	45.21	YIL010W	DOT5		Nuclear thiol peroxidase which functions as an alkyl-hydroperoxide reductase during post-diauxic growth
315H02	YLR133W	1	0.279739		100.29		92.51		1	42.7953	39.6296	59.4	61.53	51.6	YLR133W	CKI1		Choline kinase, catalyzing the first step in phosphatidylcholine synthesis via the CDP-choline (Kennedy pathway); exhibits some ethanolamine kinase activity contributing to phosphatidylethanolamine synthesis via the CDP-ethanolamine pathway
339C09	YNR015W	1	0.279878		101.42		93.33		1	43.5107	40.1944	44.51	47.46	48.87	YNR015W	SMM1	DUS2	Dihydrouridine synthase, member of a family of dihydrouridine synthases including Dus1p, Smm1p, Dus3p, and Dus4p; modifies uridine residues at position 20 of cytoplasmic tRNAs
301F10	YLL001W	3	0.279913	0.0487449	98.7733	9.62303	91.7267	9.63663	1	41.7268	38.2408	48.93	49.29	36.06	YLL001W	DNM1		Dynamin-related GTPase required for mitochondrial fission and morphology; assembles on the cytoplasmic face of mitochondrial tubules at sites at which division will occur; also participates in endocytosis and regulating peroxisome abundance
345F10	YDL077C	1	0.279913		94.54		85.65		1	45.5055	41.6297	55.51	59.22	58.93	YDL077C	VAM6	VPS39 VPL18 CVT4 VPL22	Vacuolar protein that plays a critical role in the tethering steps of vacuolar membrane fusion by facilitating guanine nucleotide exchange on small guanosine triphosphatase Ypt7p
332F11	YHL002W	1	0.279979		105.11		96.23		1	45.723	42.5071	53.53	57.94	54.36	YHL002W	HSE1		Subunit of the endosomal Vps27p-Hse1p complex required for sorting of ubiquitinated membrane proteins into intralumenal vesicles prior to vacuolar degradation, as well as for recycling of Golgi proteins and formation of lumenal membranes
342D12	YKR046C	1	0.28		100.12		90.07		1	45.5662	41.0516	46.95	48.8	45.21	YKR046C	PET10		Protein of unknown function that co-purifies with lipid particles; expression pattern suggests a role in respiratory growth; computational analysis of large-scale protein-protein interaction data suggests a role in ATP/ADP exchange
346C12	YDR506C	1	0.28		101.47		93.81		1	51.6984	46.765	46.26	48.19	50.7	YDR506C			Possible membrane-localized protein
325H11	YNL203C	1	0.28		106.17		95.37		1	43.7156	40.1944	55.09	56.86	57.98	YNL203C
344B01	YPR013C	1	0.280016		96.85		90.39		1	50.3317	44.6022	45.98	48.38	45.21	YPR013C			Putative zinc finger protein; YPR013C is not an essential gene
339B11	YNR002C	1	0.280057		102.07		93.46		1	43.5267	40.1944	46.44	48.27	36.99	YNR002C	ATO2	FUN34	Putative transmembrane protein involved in export of ammonia, a starvation signal that promotes cell death in aging colonies; phosphorylated in mitochondria; member of the TC 9.B.33 YaaH family; homolog of Ady2p and Y. lipolytica Gpr1p
317E03	YKL135C	1	0.280094		97.87		89.32		1	41.1028	38.2408	52.71	56.26	61.64	YKL135C	APL2		Beta-adaptin, large subunit of the clathrin-associated protein (AP-1) complex; binds clathrin; involved in clathrin-dependent Golgi protein sorting
331F12	YPR058W	1	0.280101		109.04		99.39		1	45.3458	41.6297	52.24	54.47	52.51	YPR058W	YMC1		Mitochondrial protein, putative inner membrane transporter with a role in oleate metabolism and glutamate biosynthesis; member of the mitochondrial carrier (MCF) family; has similarity with Ymc2p
325E02	YGL056C	1	0.280138		101.8		92.06		1	45.0751	41.6297	50.99	51.41	47.04	YGL056C	SDS23		One of two S. cerevisiae homologs (Sds23p and Sds24p) of the S. pombe Sds23 protein, which is implicated in APC/cyclosome regulation; involved in cell separation during budding
330D05	YLR041W	1	0.280149		98.83		90.3		1	42.676	39.6296	47.97	51.06	51.6	YLR041W
325E10	YGL072C	1	0.280151		109.11		98.56		1	54.9875	50.3031	50.73	51.33	50.69	YGL072C
339G07	YBR018C	1	0.280254		99.04		90.11		1	43.6854	40.1944	45.67	48.72	33.34	YBR018C	GAL7		Galactose-1-phosphate uridyl transferase, synthesizes glucose-1-phosphate and UDP-galactose from UDP-D-glucose and alpha-D-galactose-1-phosphate in the second step of galactose catabolism
339A11	YNL027W	1	0.280306		98.7		90.81		1	42.2676	39.6296	51.5	52.06	35.16	YNL027W	CRZ1	TCN1 HAL8	Transcription factor that activates transcription of genes involved in stress response; nuclear localization is positively regulated by calcineurin-mediated dephosphorylation
307H03	YOL059W	1	0.280444		103.67		94.08		1	43.8047	40.1944	49.32	51.03	55.27	YOL059W	GPD2	GPD3	NAD-dependent glycerol 3-phosphate dehydrogenase, homolog of Gpd1p, expression is controlled by an oxygen-independent signaling pathway required to regulate metabolism under anoxic conditions; located in cytosol and mitochondria
310E12	YDR102C	1	0.280475		97.78		91.34		1	43.8178	41.0516	49.32	50.7	50.7	YDR102C
345H04	YDR439W	3	0.280497	0.0784872	109.837	5.82331	101.713	6.2624	1	49.347	43.0989	53.53	54.99	49.78	YDR439W	LRS4		Nucleolar protein that forms a complex with Csm1p, and then Mam1p at kinetochores during meiosis I to mediate accurate homolog segregation; required for condensin recruitment to the replication fork barrier site and rDNA repeat segregation
332C09	YJL082W	1	0.280505		99.03		89.53		1	42.84	40.1944	50.77	52.68	51.6	YJL082W	IML2		Protein of unknown function; the authentic, non-tagged protein is detected in highly purified mitochondria in high-throughput studies
306E11	YOR089C	1	0.28051		116.07		112		1	48.0395	45.2132	47.1	51.29	48.87	YOR089C	VPS21	YPT51 YPT21 VPS12 VPT12	Rab family GTPase required for endocytic transport and for sorting of vacuolar hydrolases; localized in endocytic intermediates; detected in mitochondria; geranylgeranylation required for membrane association; mammalian Rab5 homolog
339E01	YNR037C	1	0.280518		102.4		95.56		1	37.6387	35.3006	33.58	36.51	41.56	YNR037C	RSM19		Mitochondrial ribosomal protein of the small subunit, has similarity to E. coli S19 ribosomal protein
308E11	YPL206C	1	0.280539		97.9		89.56		1	45.0987	41.6297	49.35	51.4	47.94	YPL206C	PGC1		Phosphatidyl Glycerol phospholipase C; regulates the phosphatidylglycerol (PG) content via a phospholipase C-type degradation mechanism; contains glycerophosphodiester phosphodiesterase motifs
301F09	YAR047C	2	0.28055	0.0719875	103.135	9.14289	96.645	8.35093	1	42.4541	38.7924	51.93	56.26	47.94	YAR047C
331E02	YPR017C	1	0.280761		110.57		101.65		1	44.7003	41.6297	48.05	49.86	26.03	YPR017C	DSS4		Guanine nucleotide dissociation stimulator for Sec4p, functions in the post-Golgi secretory pathway; binds zinc, found both on membranes and in the cytosol
326G03	YKR055W	1	0.28078		97.16		88.13		1	60.0899	56.8268	52.43	53.24	36.07	YKR055W	RHO4		Non-essential small GTPase of the Rho/Rac subfamily of Ras-like proteins, likely to be involved in the establishment of cell polarity
326A12	YNL183C	1	0.280785		108.17		97.33		1	43.9111	41.0516	41.83	41.57	31.52	YNL183C	NPR1		Protein kinase that stabilizes several plasma membrane amino acid transporters by antagonizing their ubiquitin-mediated degradation; phosphorylates Aly2p
339D05	YNR027W	1	0.280828		100.61		93.11		1	45.0189	41.6297	50.8	53.53	51.61	YNR027W	BUD17		Putative pyridoxal kinase, a key enzyme in vitamin B6 metabolism; involved in bud-site selection; diploid mutants display a random rather than a bipolar budding pattern; similarity to yeast BUD16 and human pyridoxal kinase (PDXK)
326D04	YKL218C	1	0.280865		93.83		85.6		1	44.0825	41.0516	45.95	48.51	33.33	YKL218C	SRY1		3-hydroxyaspartate dehydratase, deaminates L-threo-3-hydroxyaspartate to form oxaloacetate and ammonia; required in the presence of hydroxyaspartate; highly similar to mouse serine racemase (Srr) but has no serine racemase activity
335D09	YDR032C	1	0.280899		99.92		94.12		1	45.0287	41.0516	56.22	57.11	51.6	YDR032C	PST2		Protein with similarity to members of a family of flavodoxin-like proteins; induced by oxidative stress in a Yap1p dependent manner; the authentic, non-tagged protein is detected in highly purified mitochondria in high-throughput studies
342B01	YJL141C	1	0.280946		97.19		88.48		3.1	43.1734	40.1944	51.1	52.64	52.51	YJL141C	YAK1		Serine-threonine protein kinase that is part of a glucose-sensing system involved in growth control in response to glucose availability; translocates from the cytoplasm to the nucleus and phosphorylates Pop2p in response to a glucose signal
315B06	YCL002C	1	0.281004		85.94		77.95		1	45.3949	41.6297	54.81	57.44	53.43	YCL002C			Putative protein of unknown function; YCL002C is not an essential gene
314H11	YHR178W	1	0.281032		98.33		90.66		1	41.8408	38.7924	52.75	54.19	51.6	YHR178W	STB5		Transcription factor, involved in regulating multidrug resistance and oxidative stress response; forms a heterodimer with Pdr1p; contains a Zn(II)2Cys6 zinc finger domain that interacts with a pleiotropic drug resistance element in vitro
346H08	YGL154C	1	0.281084		101.6		93.06		1	42.9363	39.6296	51.3	52.58	49.78	YGL154C	LYS5		Phosphopantetheinyl transferase involved in lysine biosynthesis; converts inactive apo-form of Lys2p (alpha-aminoadipate reductase) into catalytically active holo-form by posttranslational addition of phosphopantetheine
340B07	YBR058C	1	0.281094		104.5		95.42		1	44.1223	41.0516	47.43	49.16	47.05	YBR058C	UBP14	GID6	Ubiquitin-specific protease that specifically disassembles unanchored ubiquitin chains; involved in fructose-1,6-bisphosphatase (Fbp1p) degradation; similar to human isopeptidase T
347H03	YMR057C	1	0.281203		105.62		96.1		1	45.5377	41.6297	55.73	55.9	55.27	YMR057C
305H07	YOR013W	1	0.281218		100.17		92.09		1	44.9466	41.0516	43.12	44.26	23.29	YOR013W
341D07	YNL070W	1	0.281238		146.66		140.01		1	49.3521	45.2132	63.31	66.44	53.43	YNL070W	TOM7	YOK22 MOM7	Component of the TOM (translocase of outer membrane) complex responsible for recognition and initial import steps for all mitochondrially directed proteins; promotes assembly and stability of the TOM complex
326G09	YKR061W	1	0.281403		101.91		92.38		1	43.0844	40.1944	61.68	66.75	58.93	YKR061W	KTR2		Mannosyltransferase involved in N-linked protein glycosylation; member of the KRE2/MNT1 mannosyltransferase family
345G12	YDL094C	1	0.281417		97.46		89.35		1	43.7054	40.1944	41.34	43.19	40.65	YDL094C
343G08	YFR025C	1	0.281439		100.27		92.05		1	41.9719	38.7924	49.58	52.2	51.6	YFR025C	HIS2		Histidinolphosphatase, catalyzes the eighth step in histidine biosynthesis; mutations cause histidine auxotrophy and sensitivity to Cu, Co, and Ni salts; transcription is regulated by general amino acid control
347G05	YER185W	1	0.281646		105.02		95.23		1	44.2921	41.0516	52.68	53.19	53.43	YER185W	PUG1		Plasma membrane protein with roles in the uptake of protoprophyrin IX and the efflux of heme; expression is induced under both low-heme and low-oxygen conditions; member of the fungal lipid-translocating exporter (LTE) family of proteins
317H04	YOR097C	1	0.281682		83.85		77.1		1	45.1743	41.6297	48.32	49.06	43.4	YOR097C			Putative protein of unknown function; identified as interacting with Hsp82p in a high-throughput two-hybrid screen; YOR097C is not an essential gene
345H05	YDR440W	1	0.281688		102.18		94.98		1	44.5392	41.6297	50.27	52.24	44.3	YDR440W	DOT1	KMT4 PCH1	Nucleosomal histone H3-Lys79 methylase; methylation is required for telomeric silencing, meiotic checkpoint control, and DNA damage response
336D04	YJR024C	1	0.281706		91.51		83.66		1	43.1287	40.1944	51.94	55.62	51.6	YJR024C	MDE1		5'-methylthioribulose-1-phosphate dehydratase; acts in the methionine salvage pathway; potential Smt3p sumoylation substrate; expression downregulated by caspofungin and deletion mutant is caspofungin resistant
322G10	YPL038W	2	0.281925	0.135357	97.245	10.1187	88.41	9.36209	1	43.0062	40.1944	48.48	51.9	47.94	YPL038W	MET31		Zinc-finger DNA-binding protein, involved in transcriptional regulation of the methionine biosynthetic genes, similar to Met32p
341F05	YNL107W	1	0.281963		110.49		101.63		4.5	44.6577	41.0516	46.26	48.1	44.3	YNL107W	YAF9		Subunit of both the NuA4 histone H4 acetyltransferase complex and the SWR1 complex, may function to antagonize silencing near telomeres; interacts directly with Swc4p, has homology to human leukemogenic protein AF9, contains a YEATS domain
307G10	YOL055C	1	0.281985		96.75		88.17		1	42.9984	39.6296	46.17	47.24	37.91	YOL055C	THI20		Multifunctional protein with hydroxymethylpyrimidine phosphate (HMP-P) kinase and thiaminase activities; involved in thiamine biosynthesis and degradation; in a gene family with THI21 and THI22; HMP-P kinase activity redundant with Thi21p
333H03	YMR175W	1	0.282134		108.38		97.72		1	44.0348	40.1944	52.24	52.92	47.05	YMR175W	SIP18		Phospholipid-binding hydrophilin with a role in dessication resistance; expression is induced by osmotic stress
348D11	YFL010C	1	0.282197		98.56		91.5		1	43.1802	39.6296	45.21	47.71	45.21	YFL010C	WWM1		WW domain containing protein of unknown function; binds to Mca1p, a caspase-related protease that regulates H2O2-induced apoptosis; overexpression causes G1 phase growth arrest and clonal death that is suppressed by overexpression of MCA1
308F09	YPL195W	1	0.282288		91.6		84.07		1	45.4289	41.6297	45.77	48.03	47.05	YPL195W	APL5	YKS4	Delta adaptin-like subunit of the clathrin associated protein complex (AP-3); functions in transport of alkaline phosphatase to the vacuole via the alternate pathway, suppressor of loss of casein kinase 1 function
317A01	YKL070W	1	0.282334		105.26		97.44		1	42.5845	39.6296	46.26	49.39	48.87	YKL070W			Putative protein of unknown function; expression induced in cells treated with mycotoxins patulin or citrinin; the authentic, non-tagged protein is detected in highly purified mitochondria in high-throughput studies
307D04	YOL002C	1	0.28241		99.34		89.61		1	42.9059	39.6296	54.6	54.43	47.05	YOL002C	IZH2	PHO36	Plasma membrane protein involved in zinc homeostasis and osmotin-induced apoptosis; transcription regulated by Zap1p, zinc and fatty acid levels; similar to mammalian adiponectins; deletion increases sensitivity to elevated zinc
345D12	YDL037C	1	0.282443		110.94		100.21		1	45.5867	41.6297	53.77	56.15	57.98	YDL037C	BSC1		Protein of unconfirmed function, similar to cell surface flocculin Muc1p; ORF exhibits genomic organization compatible with a translational readthrough-dependent mode of expression
336E09	YJR052W	1	0.282469		99.76		91.45		1	42.8109	39.6296	46.66	48.06	41.56	YJR052W	RAD7		Protein that recognizes and binds damaged DNA in an ATP-dependent manner (with Rad16p) during nucleotide excision repair; subunit of Nucleotide Excision Repair Factor 4 (NEF4) and the Elongin-Cullin-Socs (ECS) ligase complex
326H04	YDR249C	1	0.282506		98.83		90.6		1	45.0234	42.5071	61.22	65.73	54.36	YDR249C			Putative protein of unknown function
342A02	YGR117C	1	0.282516		101.52		92.15		1	43.2692	40.1944	58.01	57.15	52.51	YGR117C			Putative protein of unknown function; green fluorescent protein (GFP)-fusion protein localizes to the cytoplasm
318A04	YOR114W	1	0.282533		91.13		85.48		1	44.5262	41.0516	50.4	50.77	48.87	YOR114W			Putative protein of unknown function; null mutant is viable
308C02	YPL258C	1	0.282562		104.27		95.67		1	43.7018	41.0516	46.8	51	42.48	YPL258C	THI21		Hydroxymethylpyrimidine phosphate kinase, involved in the last steps in thiamine biosynthesis; member of a gene family with THI20 and THI22; Thi20p also has this activity
320E09	YLR258W	1	0.282631		98.87		91.42		1	41.8634	38.7924	48.71	49.91	48.87	YLR258W	GSY2		Glycogen synthase, similar to Gsy1p; expression induced by glucose limitation, nitrogen starvation, heat shock, and stationary phase; activity regulated by cAMP-dependent, Snf1p and Pho85p kinases as well as by the Gac1p-Glc7p phosphatase
336G06	YDL114W	1	0.282632		97.94		89.47		1	44.1076	40.1944	52.58	55.55	55.27	YDL114W			Putative protein of unknown function with similarity to acyl-carrier-protein reductases; YDL114W is not an essential gene
338B06	YGL017W	1	0.282647		103.1		95.68		1	45.3761	42.5071	44.96	48.3	50.69	YGL017W	ATE1	arginyl-tRNA-protein transferase	Arginyl-tRNA-protein transferase, catalyzes post-translational conjugation of arginine to the amino termini of acceptor proteins which are then subject to degradation via the N-end rule pathway
309H05	YBR223C	1	0.282662		110.03		99.33		1	45.4665	42.5071	50.24	51.4	50.7	YBR223C	TDP1		Tyrosyl-DNA Phosphodiesterase I, hydrolyzes 3' and 5'-phosphotyrosyl bonds, involved in the repair of DNA lesions created by topoisomerase I and topoisomerase II; mutations in human homolog result in the neurodegenerative disease SCANI
321B01	YDR153C	1	0.282682		80.39		72.88		1	42.8953	40.1944	51.57	52	47.94	YDR153C	ENT5		Protein containing an N-terminal epsin-like domain involved in clathrin recruitment and traffic between the Golgi and endosomes; associates with the clathrin adaptor Gga2p, clathrin adaptor complex AP-1, and clathrin
307F05	YOL037C	1	0.282712		95.14		87.4		1	45.8781	42.5071	45.8	47.97	17.81	YOL037C
334D06	YJR097W	1	0.282718		102.9		96.06		1	45.2892	41.6297	49.81	52.65	57.08	YJR097W	JJJ3	DPH4	Protein of unknown function, contains a J-domain, which is a region with homology to the E. coli DnaJ protein
339F03	YBL102W	1	0.282741		101.53		92.63		1	43.5306	39.6296	44.86	48.55	51.61	YBL102W	SFT2		Non-essential tetra-spanning membrane protein found mostly in the late Golgi, can suppress some sed5 alleles; may be part of the transport machinery, but precise function is unknown; similar to mammalian syntaxin 5
318G07	YOR240W	1	0.282761		94.48		85.94		1	43.8993	40.1944	47.94	51.63	23.29	YOR240W
326A08	YNL193W	1	0.282931		102.94		92.92		1	42.8806	40.1944	51.03	52.78	44.3	YNL193W			Putative protein of unknown function; exhibits a two-hybrid interaction with Yhr151cp in a large-scale analysis
323B04	YPR114W	1	0.282957		98.99		90.58		1	42.6154	39.6296	47.84	51.2	52.51	YPR114W			Putative protein of unknown function
301E10	YAR027W	2	0.283008	0.0393416	103.51	13.7603	96.665	11.4198	1	41.7777	38.2408	50.4	53.22	29.67	YAR027W	UIP3		Putative integral membrane protein of unknown function; interacts with Ulp1p at the nuclear periphery; member of DUP240 gene family
336C10	YJR015W	1	0.283077		94.44		85.95		1	44.2337	41.0516	50.04	52.27	51.6	YJR015W			Putative protein of unknown function; localizes to the endoplasmic reticulum and cytoplasm; predicted to encode a membrane transporter based on phylogenetic analysis; YJR015W is a non-essential gene
327E02	YDR329C	1	0.283094		102.78		92.83		1	42.9279	39.6296	57.44	60.18	58.93	YDR329C	PEX3	PAS3	Peroxisomal membrane protein (PMP) required for proper localization and stability of PMPs; anchors peroxisome retention factor Inp1p at the peroxisomal membrane; interacts with Pex19p
311H04	YEL030W	1	0.283175		100.85		92.42		1	43.7565	40.1944	50.01	51.13	47.94	YEL030W	ECM10	SSC3	Heat shock protein of the Hsp70 family, localized in mitochondrial nucleoids, plays a role in protein translocation, interacts with Mge1p in an ATP-dependent manner; overexpression induces extensive mitochondrial DNA aggregations
346C02	YDR491C	1	0.283214		102.07		94.55		1	45.3433	41.6297	47.97	51.2	45.21	YDR491C
301H05	YLL029W	2	0.283296	0.06993	97.22	15.9523	90.405	14.4038	1	42.8202	39.6296	44.85	48.06	37.91	YLL029W	FRA1	RUP2	Protein involved in negative regulation of transcription of iron regulon; forms an iron independent complex with Fra2p, Grx3p, and Grx4p; cytosolic; mutant fails to repress transcription of iron regulon and is defective in spore formation
316H07	YKL064W	1	0.283327		97.94		90.75		1	43.3553	40.1944	51.9	53.81	34.24	YKL064W	MNR2		Vacuolar membrane protein required for magnesium homeostasis; putative magnesium transporter; has similarity to Alr1p and Alr2p, which mediate influx of Mg2+ and other divalent cations
308C12	YPL245W	1	0.283333		105.73		96.5		1	44.949	41.6297	46.95	49.58	44.3	YPL245W			Putative protein of unknown function; green fluorescent protein (GFP)-fusion protein localizes to both the nucleus and the cytoplasm
303A07	YML082W	2	0.283442	0.0210555	101.42	14.9624	94.055	14.0926	1	41.7983	38.2408	48.29	51	56.19	YML082W			Putative protein predicted to have carbon-sulfur lyase activity; green fluorescent protein (GFP)-fusion protein localizes to the nucleus and the cytoplasm; YNML082W is not an essential gene
332F03	YJL030W	1	0.283443		104.01		95.43		1	45.0082	41.6297	57.01	59.88	51.6	YJL030W	MAD2		Component of the spindle-assembly checkpoint complex, which delays the onset of anaphase in cells with defects in mitotic spindle assembly; forms a complex with Mad1p
307A12	YOR352W	1	0.283607		99.78		89.63		1	43.7431	40.1944	51	51.73	47.94	YOR352W			Putative protein of unknown function; expression levels regulated by Arg5,6p; green fluorescent protein (GFP)-fusion protein localizes to the cytoplasm and nucleus
308C10	YPL247C	1	0.28364		105.64		97.37		1	43.3343	40.1944	74.61	62.42	15.07	YPL247C			Putative protein of unknown function; green fluorescent protein (GFP)-fusion protein localizes to the cytoplasm and nucleus; similar to the petunia WD repeat protein an11; overexpression causes a cell cycle delay or arrest
330G03	YML094W	3	0.283642	0.110288	101.37	4.98346	95.7	6.55353	7.5	48.6886	45.2132	50.24	52.65	51.6	YML094W	GIM5	PFD5	Subunit of the heterohexameric cochaperone prefoldin complex which binds specifically to cytosolic chaperonin and transfers target proteins to it
327B03	YDR276C	1	0.283667		91.21		83.77		3.4	45.1995	42.5071	61.04	68.2	38.82	YDR276C	PMP3	SNA1	Small plasma membrane protein related to a family of plant polypeptides that are overexpressed under high salt concentration or low temperature, not essential for viability, deletion causes hyperpolarization of the plasma membrane potential
342A11	YJL139C	1	0.283688		89.78		83.35		1	45.0345	38.2408	44.97	46.92	47.94	YJL139C	YUR1		Mannosyltransferase of the KTR1 family, involved in protein N-glycosylation; located in the Golgi apparatus
308H07	YPL165C	1	0.28369		108		98.57		1	51.2999	46.765	52.1	52.17	48.87	YPL165C	SET6		SET domain protein of unknown function; deletion heterozygote is sensitive to compounds that target ergosterol biosynthesis, may be involved in compound availability
307D01	YOR385W	1	0.283801		96.93		86.85		1	41.8911	38.7924	54.22	54.6	47.05	YOR385W			Putative protein of unknown function; green fluorescent protein (GFP)-fusion protein localizes to the cytoplasm; YOR385W is not an essential gene
323H04	YDR363W-A	1	0.283843		99.99		90.75		4.6	47.0452	43.0989	49.55	48.8	34.24	YDR363W-A	SEM1	HOD1 DSS1	Component of the lid subcomplex of the regulatory subunit of the 26S proteasome; involved in mRNA export mediated by the TREX-2 complex (Sac3p-Thp1p); ortholog of human DSS1
340G06	YIL160C	1	0.283843		112.65		102.98		1	47.3321	43.0989	49.32	51.4	45.21	YIL160C	POT1	POX3 FOX3	3-ketoacyl-CoA thiolase with broad chain length specificity, cleaves 3-ketoacyl-CoA into acyl-CoA and acetyl-CoA during beta-oxidation of fatty acids
346C05	YDR495C	1	0.283849		116.69		110.82		1	48.3346	44.6022	59.44	60.63	52.51	YDR495C	VPS3	PEP6 VPL3 VPT17	Component of CORVET tethering complex; cytoplasmic protein required for the sorting and processing of soluble vacuolar proteins, acidification of the vacuolar lumen, and assembly of the vacuolar H+-ATPase
318E08	YOR209C	1	0.283852		112.05		105.03		4.8	47.4415	43.9967	64.51	68.36	64.4	YOR209C	NPT1		Nicotinate phosphoribosyltransferase, acts in the salvage pathway of NAD+ biosynthesis; required for silencing at rDNA and telomeres and has a role in silencing at mating-type loci; localized to the nucleus
343F09	YOR274W	1	0.283995		100.01		94.05		1	42.9913	40.1944	46.89	49.35	46.11	YOR274W	MOD5		Delta 2-isopentenyl pyrophosphate:tRNA isopentenyl transferase, required for biosynthesis of the modified base isopentenyladenosine in mitochondrial and cytoplasmic tRNAs; gene is nuclear and encodes two isozymic forms
308C01	YPL259C	1	0.284026		105.44		97.34		1	42.6711	40.1944	47.65	49.75	48.87	YPL259C	APM1	YAP54	Mu1-like medium subunit of the clathrin-associated protein complex (AP-1); binds clathrin; involved in clathrin-dependent Golgi protein sorting
339A03	YNL012W	1	0.28406		100.91		92.92		1	43.3297	39.6296	46.99	49.01	41.56	YNL012W	SPO1		Meiosis-specific prospore protein; required for meiotic spindle pole body duplication and separation; required to produce bending force necessary for proper prospore membrane assembly during sporulation; has similarity to phospholipase B
309F07	YBR199W	1	0.284222		107.49		97.89		1	42.4722	39.6296	48.48	51.26	42.48	YBR199W	KTR4		Putative mannosyltransferase involved in protein glycosylation; member of the KRE2/MNT1 mannosyltransferase family
336E01	YJR038C	1	0.284223		98.59		90.73		1	45.8705	41.6297	54.12	54.33	51.6	YJR038C
346H04	YGL149W	1	0.284238		106.18		97.97		1	44.5557	41.0516	55.02	55.66	47.05	YGL149W
308F01	YPL203W	1	0.284239		101.15		92.6		1	45.6769	42.5071	49.13	51.87	43.4	YPL203W	TPK2	PKA3 YKR1 PKA2	cAMP-dependent protein kinase catalytic subunit; promotes vegetative growth in response to nutrients via the Ras-cAMP signaling pathway; partially redundant with Tpk1p and Tpk3p; localizes to P-bodies during stationary phase
322F10	YPL054W	1	0.28428		96.25		90.44		1	43.2547	40.1944	47.24	50.24	55.27	YPL054W	LEE1		Zinc-finger protein of unknown function
311B01	YDR359C	1	0.28429		117.69		107.91		13.3	64.886	61.9787	87.44	79.93	62.56	YDR359C	EAF1	VID21	Component of the NuA4 histone acetyltransferase complex; acts as a platform for assembly of NuA4 subunits into the native complex; required for initiation of pre-meiotic DNA replication, likely due to its requirement for expression of IME1
333D09	YKR104W	1	0.284336		100.3		91.47		1	44.4884	41.0516	48.61	50.93	45.21	YKR104W		NFT1	Putative transporter of the multidrug resistance-associated protein (MRP) subfamily; contains a stop codon in S288C; adjacent ORFs YKR103W and YKR104W are merged in different strain backgrounds
326H11	YDR256C	1	0.284424		99.68		90.47		1	45.9952	42.5071	46.8	48.49	33.34	YDR256C	CTA1		Catalase A, breaks down hydrogen peroxide in the peroxisomal matrix formed by acyl-CoA oxidase (Pox1p) during fatty acid beta-oxidation
325H04	YNL214W	1	0.284556		104.9		97.99		1	43.6298	40.1944	51.53	52.51	50.7	YNL214W	PEX17	PAS9	Peroxisomal membrane peroxin and subunit of the docking complex that facilitates the import of peroxisomal matrix proteins; required for peroxisome biogenesis
336F08	YDL096C	1	0.284582		99.01		90.11		1	42.3576	38.2408	49.42	52.37	51.6	YDL096C
332E10	YJL044C	1	0.284605		103.93		95.11		1	45.3247	42.5071	49.22	52.58	49.78	YJL044C	GYP6		GTPase-activating protein (GAP) for the yeast Rab family member, Ypt6p; involved in vesicle mediated protein transport
314E02	YHR108W	1	0.284615		97.76		89		1	43.8467	41.0516	52.24	55.87	53.43	YHR108W	GGA2		Protein that interacts with and regulates Arf1p and Arf2p in a GTP-dependent manner to facilitate traffic through the late Golgi; binds phosphatidylinositol 4-phosphate, which plays a role in TGN localization; has homology to gamma-adaptin
304A05	YMR153W	1	0.284639		106.95		97.39		1	43.7894	40.1944	46.73	49.09	51.6	YMR153W	NUP53		Subunit of the nuclear pore complex (NPC), interacts with karyopherin Kap121p or with Nup170p via overlapping regions of Nup53p, involved in activation of the spindle checkpoint mediated by the Mad1p-Mad2p complex
330B07	YHR045W	1	0.28468		99.4		90.34		1	44.7983	42.5071	52.24	52.85	48.87	YHR045W			Putative protein of unknown function; possible role in iron metabolism and/or amino acid and carbohydrate metabolism; green fluorescent protein (GFP)-fusion protein localizes to the endoplasmic reticulum
307G01	YOL047C	2	0.284716	0.0301833	92.815	10.3167	84.98	10.8046	1	42.2546	38.7924	49.35	50.5	49.78	YOL047C			Protein of unknown function; green fluorescent protein (GFP)-fusion protein localizes to the cytoplasm in a punctate pattern
343F07	YOR271C	1	0.284769		99.91		91.87		1	43.6881	41.0516	46.99	49.42	50.7	YOR271C	FSF1		Putative protein, predicted to be an alpha-isopropylmalate carrier; belongs to the sideroblastic-associated protein family; non-tagged protein is detected in purified mitochondria; likely to play a role in iron homeostasis
342D08	YKR036C	1	0.284852		101.49		91.75		1	43.2574	38.7924	53.67	55.48	54.36	YKR036C	CAF4		WD40 repeat-containing protein associated with the CCR4-NOT complex, interacts in a Ccr4p-dependent manner with Ssn2p; also interacts with Fis1p, Mdv1p and Dnm1p and plays a role in mitochondrial fission
344F08	YPR043W	1	0.284936		104.9		97.78		4.3	51.9158	48.3519	49.26	51.93	35.17	YPR043W	RPL43A	L43A	Protein component of the large (60S) ribosomal subunit, identical to Rpl43Bp and has similarity to rat L37a ribosomal protein; null mutation confers a dominant lethal phenotype
339G12	YBR024W	1	0.284975		97.71		87.84		1	42.8485	39.6296	44.16	47.03	47.95	YBR024W	SCO2		Protein anchored to the mitochondrial inner membrane, similar to Sco1p and may have a redundant function with Sco1p in delivery of copper to cytochrome c oxidase; interacts with Cox2p
319H02	YLR356W	1	0.285017		89.46		84.08		1	42.8655	39.6296	47.46	50.14	50.7	YLR356W	ATG33		Mitochondrial mitophagy-specific protein; required primarily for mitophagy induced at the post-log phase; not required for other types of selective autophagy or macroautophagy; conserved within fungi, but not in higher eukaryotes
331A09	YML123C	1	0.285058		89.67		80.67		1	39.248	36.6176	75.2	63.33	24.2	YML123C	PHO84	phoT	High-affinity inorganic phosphate (Pi) transporter and low-affinity manganese transporter; regulated by Pho4p and Spt7p; mutation confers resistance to arsenate; exit from the ER during maturation requires Pho86p
309G01	YBR206W	1	0.285077		108.77		98.37		1	46.0813	42.5071	48.19	50.3	52.51	YBR206W
346H11	YGL158W	2	0.285171	0.0583856	101.055	1.36472	92.92	1.28693	1	43.4299	40.1944	55.55	56.9	52.51	YGL158W	RCK1		Protein kinase involved in the response to oxidative stress; identified as suppressor of S. pombe cell cycle checkpoint mutations
308C08	YPL249C	1	0.285196		102.07		93.61		1	42.5886	39.6296	42.1	45.89	46.11	YPL249C	GYP5		GTPase-activating protein (GAP) for yeast Rab family members, involved in ER to Golgi trafficking; exhibits GAP activity toward Ypt1p that is stimulated by Gyl1p, also acts on Sec4p; interacts with Gyl1p, Rvs161p and Rvs167p
346C10	YDR504C	1	0.285231		102.83		94.63		1	45.4083	42.5071	48.42	49.84	48.87	YDR504C	SPG3		Protein required for survival at high temperature during stationary phase; not required for growth on nonfermentable carbon sources
320A04	YLR376C	1	0.285282		95.02		86.69		1	44.1089	41.0516	49.42	52.1	47.94	YLR376C	PSY3		Protein involved in a Rad51p-, Rad54p-dependent pathway for homologous recombination repair; deletion results in a mutator phenotype; deletion increases sensitivity to anticancer drugs oxaliplatin and cisplatin but not mitomycin C
336E05	YJR048W	1	0.285345		101.02		92.06		1	42.4477	39.6296	64.9	67.83	44.3	YJR048W	CYC1	iso-1-cytochrome c	Cytochrome c, isoform 1; electron carrier of the mitochondrial intermembrane space that transfers electrons from ubiquinone-cytochrome c oxidoreductase to cytochrome c oxidase during cellular respiration
313B10	YGR167W	1	0.28535		132.53		124.45		13.7	79.8632	79.283	93.1	89.12	17.81	YGR167W	CLC1	SCD4	Clathrin light chain, subunit of the major coat protein involved in intracellular protein transport and endocytosis; thought to regulate clathrin function; two Clathrin heavy chains (CHC1) form the clathrin triskelion structural component
317H11	YOR108W	1	0.285366		83.98		77.06		1	45.2697	42.5071	47.71	50.5	55.27	YOR108W	LEU9		Alpha-isopropylmalate synthase II (2-isopropylmalate synthase), catalyzes the first step in the leucine biosynthesis pathway; the minor isozyme, responsible for the residual alpha-IPMS activity detected in a leu4 null mutant
331E09	YPR032W	1	0.285414		104.38		97.11		1	46.109	43.0989	51.16	53.6	48.87	YPR032W	SRO7	SOP1 SNI1	Effector of Rab GTPase Sec4p, forms a complex with Sec4p and t-SNARE Sec9p; involved in exocytosis and docking and fusion of post-Golgi vesicles with plasma membrane; homolog of Sro77p and Drosophila lgl tumor suppressor
342C07	YKL139W	1	0.285425		117.43		107.72		6.5	51.637	48.3519	61.41	63.51	46.11	YKL139W	CTK1		Catalytic (alpha) subunit of C-terminal domain kinase I (CTDK-I), which phosphorylates both RNA pol II subunit Rpo21p to affect transcription and pre-mRNA 3' end processing, and ribosomal protein Rps2p to increase translational fidelity
308B07	YPL267W	2	0.285445	0.0469567	108.245	3.06177	99.805	2.62337	1	43.2655	40.1944	46.73	49.39	45.21	YPL267W	ACM1		Pseudosubstrate inhibitor of the anaphase-promoting complex/cyclosome (APC/C), that suppresses APC/C [Cdh1]-mediated proteolysis of mitotic cyclins; associates with Cdh1p, Bmh1p and Bmh2p; cell cycle regulated protein
307F08	YOL042W	1	0.285502		96.26		88.39		1	45.3016	42.5071	58.32	49.78	47.04	YOL042W	NGL1		Putative endonuclease, has a domain similar to a magnesium-dependent endonuclease motif in mRNA deadenylase Ccr4p; the authentic, non-tagged protein is detected in highly purified mitochondria in high-throughput studies
318H04	YOR252W	1	0.285508		102.22		92.86		1	43.4456	40.1944	47.11	49.42	47.94	YOR252W	TMA16	RBF17	Protein of unknown function that associates with ribosomes
307C07	YOR378W	1	0.285567		101.78		90.66		1	44.3081	41.0516	49.94	52.04	47.05	YOR378W			Putative paralog of ATR1, but not required for boron tolerance; member of the DHA2 family of drug:H+ antiporters; YOR378W is not an essential gene
339A08	YNL023C	1	0.285623		102.02		94.01		1	41.8088	38.7924	39.4	41.43	30.59	YNL023C	FAP1		Protein that binds to Fpr1p, conferring rapamycin resistance by competing with rapamycin for Fpr1p binding; accumulates in the nucleus upon treatment of cells with rapamycin; has similarity to D. melanogaster shuttle craft and human NFX1
346A11	YDR465C	1	0.285695		102.3		94.24		1	43.7903	40.1944	46.3	47.78	47.05	YDR465C	RMT2		Arginine N5 methyltransferase; methylates ribosomal protein Rpl12 (L12) on Arg67
347H02	YMR056C	1	0.285731		107.01		96.72		1	45.5394	41.6297	49.48	51.57	51.6	YMR056C	AAC1		Mitochondrial inner membrane ADP/ATP translocator, exchanges cytosolic ADP for mitochondrially synthesized ATP; phosphorylated; Aac1p is a minor isoform while Pet9p is the major ADP/ATP translocator
320H08	YLR307W	1	0.285766		100.61		92.46		1	42.0553	38.7924	63.7	54.13	47.95	YLR307W	CDA1		Chitin deacetylase, together with Cda2p involved in the biosynthesis ascospore wall component, chitosan; required for proper rigidity of the ascospore wall
331E11	YPR038W	1	0.285771		108.07		99.92		1	44.141	40.1944	49.91	52.37	47.94	YPR038W
309A07	YPL149W	1	0.285775		113.27		101.01		1	46.2658	42.5071	49.29	51.03	50.7	YPL149W	ATG5	APG5	Conserved protein involved in autophagy and the Cvt pathway; undergoes conjugation with Atg12p to form a complex involved in Atg8p lipidation; conjugated Atg12p also forms a complex with Atg16p that is essential for autophagosome formation
339H10	YBR034C	1	0.28586		94		85.5		1	41.8979	38.2408	42.21	44.8	45.21	YBR034C	HMT1	HCP1 ODP1 RMT1	Nuclear SAM-dependent mono- and asymmetric arginine dimethylating methyltransferase that modifies hnRNPs, including Npl3p and Hrp1p, affecting their activity and nuclear export; methylates U1 snRNP protein Snp1p and ribosomal protein Rps2p
345B09	YBR162C	1	0.285885		60.81		55.11		1	51.2263	46.765	32.86	32.76	26.93	YBR162C	TOS1		Covalently-bound cell wall protein of unknown function; identified as a cell cycle regulated SBF target gene; deletion mutants are highly resistant to treatment with beta-1,3-glucanase; has sequence similarity to YJL171C
307G06	YOL052C	1	0.286029		95.84		87.02		1	47.746	43.9967	57.03	46.94	21.46	YOL052C	SPE2		S-adenosylmethionine decarboxylase, required for the biosynthesis of spermidine and spermine; cells lacking Spe2p require spermine or spermidine for growth in the presence of oxygen but not when grown anaerobically
332H12	YOL159C	1	0.28603		103.59		94.7		1	45.6084	42.5071	46.48	48.32	45.21	YOL159C			Soluble protein of unknown function; deletion mutants are viable and have elevated levels of Ty1 retrotransposition and Ty1 cDNA
318E06	YOR202W	1	0.286049		95.42		89.08		1	43.2103	39.6296	49.35	52.31	51.6	YOR202W	HIS3	HIS10 HIS8	Imidazoleglycerol-phosphate dehydratase, catalyzes the sixth step in histidine biosynthesis; mutations cause histidine auxotrophy and sensitivity to Cu, Co, and Ni salts; transcription is regulated by general amino acid control via Gcn4p
329F06	YOL101C	1	0.286072		95.95		87.05		1	44.9446	41.6297	58.68	52.26	52.51	YOL101C	IZH4		Membrane protein involved in zinc ion homeostasis, member of the four-protein IZH family, expression induced by fatty acids and altered zinc levels; deletion reduces sensitivity to excess zinc; possible role in sterol metabolism
342A08	YJL132W	1	0.286137		99.4		90.29		1	43.5712	41.0516	46.99	48.54	47.94	YJL132W			Putative protein of unknown function; localizes to the membrane fraction; possible Zap1p-regulated target gene induced by zinc deficiency; YJL132W is a non-essential gene
308E05	YPL219W	1	0.286139		101.05		92.29		1	43.5146	41.0516	48.61	53.09	54.36	YPL219W	PCL8		Cyclin, interacts with Pho85p cyclin-dependent kinase (Cdk) to phosphorylate and regulate glycogen synthase, also activates Pho85p for Glc8p phosphorylation
346F07	YGL118C	2	0.28618	0.107853	99.07	4.83661	91.085	5.06996	3.4	44.1273	41.0516	52.85	54.05	46.11	YGL118C
346H06	YGL152C	1	0.286297		107.7		99.36		1	44.169	41.6297	52.71	55.3	50.7	YGL152C
344B07	YPR037C	1	0.286486		93.96		87.76		1	45.0761	41.6297	46.08	49.19	53.43	YPR037C	ERV2		Flavin-linked sulfhydryl oxidase localized to the endoplasmic reticulum lumen, involved in disulfide bond formation within the ER
347B06	YER106W	1	0.286597		101.51		90.95		1	44.8101	41.6297	49	50.96	47.94	YER106W	MAM1		Monopolin, kinetochore associated protein involved in chromosome attachment to meiotic spindle
339C05	YNR009W	2	0.28661	0.108543	101.49	1.11723	93.255	0.106066	1	43.893	40.1944	47.95	50.93	51.61	YNR009W	NRM1		Transcriptional co-repressor of MBF (MCB binding factor)-regulated gene expression; Nrm1p associates stably with promoters via MBF to repress transcription upon exit from G1 phase
341G03	YDL133C-A	1	0.286618		104.61		97.36		1	52.7444	48.3519	48.93	51.77	45.21	YDL133C-A	RPL41B	YDL134C-A RPL47B L41B YL41 L47B	Ribosomal protein L47 of the large (60S) ribosomal subunit, identical to Rpl41Ap and has similarity to rat L41 ribosomal protein; comprised of only 25 amino acids; rpl41a rpl41b double null mutant is viable
308H12	YPL159C	1	0.286625		108.22		99.2		1	44.9392	41.6297	51.43	51.94	47.05	YPL159C	PET20		Mitochondrial protein, required for respiratory growth under some conditions and for stability of the mitochondrial genome
316A11	YLR173W	1	0.286666		82.58		76.65		1	44.3109	41.0516	51.57	53.29	47.94	YLR173W			Putative protein of unknown function
332D01	YJL073W	1	0.286727		146.58		138.19		1	45.0147	41.6297	60.22	64.71	67.11	YJL073W	JEM1	KAR8	DnaJ-like chaperone required for nuclear membrane fusion during mating, localizes to the ER membrane; exhibits genetic interactions with KAR2
329A06	YKR035W-A	1	0.286738		103.21		95.56		1	47.336	43.0989	57.47	58.38	48.87	YKR035W-A	DID2	FTI1 VPL30 VPS46 CHM1	Class E protein of the vacuolar protein-sorting (Vps) pathway; binds Vps4p and directs it to dissociate ESCRT-III complexes; forms a functional and physical complex with Ist1p; human ortholog may be altered in breast tumors
301F08	YAR044W	2	0.286805	0.0626604	103.385	10.2743	96.405	9.49644	1	42.4126	38.7924	52.41	54.85	42.48	YAR044W
317E04	YKL136W	1	0.286942		103.32		94		1	43.9166	41.0516	52.48	55.87	57.98	YKL136W
340G01	YIL154C	1	0.287006		110.06		100.66		1	64.6953	61.9787	46.99	49.91	51.6	YIL154C	IMP2'	IMP2	Transcriptional activator involved in maintenance of ion homeostasis and protection against DNA damage caused by bleomycin and other oxidants, contains a C-terminal leucine-rich repeat
309G03	YBR208C	1	0.287038		121.86		111.19		1	45.985	42.5071	69.53	62.31	57.09	YBR208C	DUR1,2	DUR80	Urea amidolyase, contains both urea carboxylase and allophanate hydrolase activities, degrades urea to CO2 and NH3; expression sensitive to nitrogen catabolite repression and induced by allophanate, an intermediate in allantoin degradation
340B09	YBR062C	1	0.287041		103.04		94.48		1	45.2786	41.6297	49.39	51	51.6	YBR062C			Protein of unknown function that interacts with Msb2p; may play a role in activation of the filamentous growth pathway.
337F05	YGR068C	1	0.287069		93.51		82.58		1	43.7189	41.0516	52.2	53.71	51.6	YGR068C	ART5		Protein proposed to regulate the endocytosis of plasma membrane proteins by recruiting the ubiquitin ligase Rsp5p to its target in the plasma membrane
345A10	YBR145W	1	0.287148		103.66		96.05		1	42.6559	39.6296	44.27	47.36	48.87	YBR145W	ADH5		Alcohol dehydrogenase isoenzyme V; involved in ethanol production
303G06	YMR027W	1	0.287203		102.33		94.67		1	43.8677	41.0516	44.54	47.11	26.03	YMR027W			Putative protein of unknown function; green fluorescent protein (GFP)-fusion protein localizes to the nucleus and cytoplasm; YMR027W is not an essential gene
305B08	YMR307W	3	0.287232	0.201846	94.8667	5.19136	85.9767	6.07558	9.8	52.2391	46.765	53.34	57.15	16.89	YMR307W	GAS1	GGP1 CWH52	Beta-1,3-glucanosyltransferase, required for cell wall assembly and also has a role in transcriptional silencing; localizes to the cell surface via a glycosylphosphatidylinositol (GPI) anchor; also found at the nuclear periphery
325G06	YNL229C	3	0.287272	0.064564	117.073	4.4659	115.11	5.39804	3.1	55.0085	53.3272	51.4	53.05	43.4	YNL229C	URE2	[URE3]	Nitrogen catabolite repression transcriptional regulator that acts by inhibition of GLN3 transcription in good nitrogen source; has glutathione peroxidase activity and can mutate to acquire GST activity; altered form creates [URE3] prion
307H07	YOL063C	1	0.287321		103.61		93.93		1	43.3126	40.1944	47.78	49.75	19.63	YOL063C	CRT10	HUS1	Protein involved in transcriptional regulation of RNR2 and RNR3; expression of the gene is induced by DNA damage and null mutations confer increased resistance to hydroxyurea; N-terminal region has a leucine repeat and a WD40 repeat
303D04	YML018C	1	0.287382		110.4		102.23		1	43.7874	41.0516	47.14	49.94	47.94	YML018C			Putative protein of unknown function; green fluorescent protein (GFP)-fusion protein localizes to the membrane of the vacuole; physical interaction with Atg27p suggests a possible role in autophagy; YML018C is not an essential gene
346B10	YDR482C	1	0.287428		99.84		92.83		1	44.2404	41.0516	52.41	53.19	50.7	YDR482C	CWC21		Protein involved in RNA splicing by the spliceosome; component of a complex containing Cef1p; interacts genetically with ISY1 and BUD13; may bind RNA; has similarity to S. pombe Cwf21p
330E07	YMR316C-A	1	0.287441		102.29		93.05		1	44.6435	40.1944	51.77	54.26	46.11	YMR316C-A
311B10	YDR374C	1	0.287455		99.49		91.7		1	44.4528	41.0516	49.45	52.2	48.87	YDR374C			Putative protein of unknown function
311H08	YEL037C	1	0.287588		106.77		99.6		1	45.1776	41.0516	47.43	47.46	38.82	YEL037C	RAD23		Protein with ubiquitin-like N terminus, subunit of Nuclear Excision Repair Factor 2 (NEF2) with Rad4p that binds damaged DNA; enhances protein deglycosylation activity of Png1p; also involved, with Rad4p, in ubiquitylated protein turnover
331D04	YMR129W	1	0.287622		90.41		81.29		1	42.8663	39.6296	50.37	52.85	50.7	YMR129W	POM152		Nuclear pore membrane glycoprotein; may be involved in duplication of nuclear pores and nuclear pore complexes during S-phase;
305H04	YOR010C	1	0.287679		99.68		91.44		1	42.1129	38.7924	45.81	46.59	35.16	YOR010C	TIR2	SRP2	Putative cell wall mannoprotein of the Srp1p/Tip1p family of serine-alanine-rich proteins; transcription is induced by cold shock and anaerobiosis
341C09	YFR011C	1	0.287732		104.46		96.68		1	47.8537	43.9967	46.86	49.13	47.05	YFR011C	AIM13		Putative protein of unknown function; the authentic, non-tagged protein is detected in highly purified mitochondria; null mutant displays reduced respiratory growth and reduced frequency of mitochondrial genome loss
343E10	YOL151W	1	0.287864		101.64		93.72		1	43.7317	40.1944	48.29	50.93	51.6	YOL151W	GRE2		3-methylbutanal reductase and NADPH-dependent methylglyoxal reductase (D-lactaldehyde dehydrogenase); stress induced (osmotic, ionic, oxidative, heat shock and heavy metals); regulated by the HOG pathway
330H12	YML113W	1	0.287994		105.01		95.94		1	43.8626	41.0516	47.97	49.61	26.93	YML113W	DAT1		DNA binding protein that recognizes oligo(dA).oligo(dT) tracts; Arg side chain in its N-terminal pentad Gly-Arg-Lys-Pro-Gly repeat is required for DNA-binding; not essential for viability
323F01	YPR185W	1	0.288112		97.73		90.45		1	42.6719	38.7924	50.7	52.34	54.36	YPR185W	ATG13	APG13	Regulatory subunit of the Atg1p signaling complex; stimulates Atg1p kinase activity; required for vesicle formation during autophagy and the cytoplasm-to-vacuole targeting (Cvt) pathway; involved in Atg9p, Atg23p, and Atg27p cycling
308B10	YPL263C	1	0.28815		103.08		94.25		1	44.1356	41.0516	45.77	48.48	45.21	YPL263C	KEL3		Cytoplasmic protein of unknown function
303F01	YMR007W	1	0.288206		102.48		96.32		1	43.6105	41.0516	49.35	51.06	50.7	YMR007W
332B11	YJL100W	1	0.288314		101.26		91.46		1	43.6515	41.0516	53.02	54.05	56.19	YJL100W	LSB6		Type II phosphatidylinositol 4-kinase that binds Las17p, which is a homolog of human Wiskott-Aldrich Syndrome protein involved in actin patch assembly and actin polymerization
342H06	YCR089W	1	0.288381		96.01		87.02		1	42.5906	40.1944	48.96	51.6	49.78	YCR089W	FIG2		Cell wall adhesin, expressed specifically during mating; may be involved in maintenance of cell wall integrity during mating
347C11	YER124C	1	0.288407		106.16		97.06		1	47.1502	43.9967	50.7	53.81	48.87	YER124C	DSE1		Daughter cell-specific protein, may regulate cross-talk between the mating and filamentation pathways; deletion affects cell separation after division and sensitivity to alpha-factor and drugs affecting the cell wall
339G03	YBR013C	1	0.288477		99.09		89.8		1	43.9617	40.1944	43.2	46.22	39.73	YBR013C			Putative protein of unknown function, haploid deletion mutant exhibits synthetic phenotype with alpha-synuclein
308E02	YPL222W	1	0.288494		98.05		89.06		1	43.278	40.1944	47.74	52.14	55.27	YPL222W	FMP40		Putative protein of unknown function; proposed to be involved in responding to environmental stresses; the authentic, non-tagged protein is detected in highly purified mitochondria in high-throughput studies
303A09	YML080W	2	0.288512	0.031197	100.635	17.4868	93.015	16.5392	1	44.2338	41.0516	47.27	50.14	38.82	YML080W	DUS1		Dihydrouridine synthase, member of a widespread family of conserved proteins including Smm1p, Dus3p, and Dus4p; modifies pre-tRNA(Phe) at U17
330F01	YMR320W	1	0.288514		100.16		92.22		1	42.8036	39.6296	53.22	53.05	50.7	YMR320W
331G10	YPR071W	1	0.288576		107.55		99.66		1	44.1526	41.6297	55.37	57.29	50.7	YPR071W			Putative membrane protein; YPR071W is not an essential gene
346D07	YDR514C	1	0.288598		98.6		90.62		1	46.7005	42.5071	49.45	51.23	45.21	YDR514C			Putative protein of unknown function
315B07	YCL005W	1	0.2886		131.75		123.26		1	77.6854	76.2001	75.53	66.48	44.3	YCL005W	LDB16		Protein of unknown function; null mutants have decreased net negative cell surface charge; GFP-fusion protein expression is induced in response to the DNA-damaging agent MMS; native protein is detected in purified mitochondria
347B03	YGL181W	1	0.288684		104.39		94.09		1	43.9806	41.0516	51.03	54.54	57.98	YGL181W	GTS1	FHT1 LSR1	Arf3p GTPase Activating Protein (GAP) that localizes to endocytic patches; gts1 mutations affect budding, cell size, heat tolerance, sporulation, life span, ultradian rhythms; localizes to nucleus and induces flocculation when overexpressed
325G04	YNL231C	1	0.288706		95.95		90.68		1	43.4914	40.1944	51.94	53.46	51.6	YNL231C	PDR16	SFH3	Phosphatidylinositol transfer protein (PITP) controlled by the multiple drug resistance regulator Pdr1p, localizes to lipid particles and microsomes, controls levels of various lipids, may regulate lipid synthesis, homologous to Pdr17p
320E07	YLR255C	1	0.288776		98.49		90.68		1	41.0087	38.2408	49.91	51.97	47.94	YLR255C
301H09	YLL040C	2	0.288804	0.0728472	148.935	13.1451	143.04	12.6996	1	45.3637	42.5071	63.71	69.37	58.91	YLL040C	VPS13	SOI1 VPT2	Protein of unknown function; heterooligomeric or homooligomeric complex; peripherally associated with membranes; homologous to human COH1; involved in sporulation, vacuolar protein sorting and protein-Golgi retention
306D11	YOR076C	1	0.288821		103.82		95.92		1	44.1069	40.1944	66.36	53.62	54.35	YOR076C	SKI7	YOR29-27	Coupling protein that mediates interactions between the Ski complex and the cytoplasmic exosome during 3'-5' RNA degradation; eRF3-like domain targets nonstop mRNA for degradation; null mutants have superkiller phenotype
318E09	YOR213C	1	0.288848		97.35		90.17		1	44.3834	41.0516	57.11	59.96	52.51	YOR213C	SAS5		Subunit of the SAS complex (Sas2p, Sas4p, Sas5p), which acetylates free histones and nucleosomes and regulates transcriptional silencing; stimulates Sas2p HAT activity
301H08	YLL039C	2	0.288909	0.00490097	104.38	9.65908	97.22	8.03273	1	44.9722	41.6297	48.22	51.16	36.99	YLL039C	UBI4	UB14 SCD2	Ubiquitin, becomes conjugated to proteins, marking them for selective degradation via the ubiquitin-26S proteasome system; essential for the cellular stress response; encoded as a polyubiquitin precursor comprised of 5 head-to-tail repeats
332D03	YJL068C	1	0.288953		105.58		96.17		1	43.7332	41.0516	53.33	54.99	48.87	YJL068C			Non-essential intracellular esterase that can function as an S-formylglutathione hydrolase; may be involved in the detoxification of formaldehyde, which can be metabolized to S-formylglutathione; similar to human esterase D
315E07	YCL061C	1	0.288988		146.85		144.87		3.4	64.9168	62.7392	56.43	58.23	47.95	YCL061C	MRC1	YCL060C	S-phase checkpoint protein required for DNA replication; interacts with and stabilizes Pol2p at stalled replication forks during stress, where it forms a pausing complex with Tof1p and is phosphorylated by Mec1p; protects uncapped telomeres
345C11	YDL018C	1	0.289142		101.02		92.18		1	44.9015	41.6297	45.92	48.48	45.21	YDL018C	ERP3		Protein with similarity to Emp24p and Erv25p, member of the p24 family involved in ER to Golgi transport
301G07	YLL017W	2	0.289299	0.0640782	103.14	12.3885	96.65	11.9218	1	43.0449	40.1944	56.15	56.65	47.05	YLL017W		SDC25	Non-essential Ras guanine nucleotide exchange factor (GEF) localized to the membrane; expressed in poor nutrients and on non-fermentable carbon sources; homologous to CDC25; contains a stop codon in S288C; full-length gene includes YLL016W
336D12	YJR037W	1	0.289321		98.01		88.65		1	42.2674	39.6296	52.65	53.02	49.78	YJR037W
303E08	YML002W	2	0.289374	0.0699972	105.285	0.671751	97.555	1.43543	1	43.4014	41.0516	46.58	49.65	37.91	YML002W			Putative protein of unknown function; expression induced by heat and by calcium shortage
336G03	YDL110C	1	0.289381		102.2		92.09		1	43.7141	40.1944	52.65	55.44	50.7	YDL110C	TMA17		Protein of unknown function that associates with ribosomes; heterozygous deletion demonstrated increases in chromosome instability in a rad9 deletion background; protein abundance is decreased upon intracellular iron depletion
304H10	YMR275C	2	0.28939	0.0289212	97.935	3.0052	90.315	4.22143	1	52.36	49.647	62.89	56.37	26.03	YMR275C	BUL1	RDS1 DAG1 SMM2	Ubiquitin-binding component of the Rsp5p E3-ubiquitin ligase complex, functional homolog of Bul2p, disruption causes temperature-sensitive growth, overexpression causes missorting of amino acid permeases
313E02	YGR209C	1	0.289416		89.43		83.13		1	43.3059	40.1944	48.58	52.78	53.43	YGR209C	TRX2	LMA1	Cytoplasmic thioredoxin isoenzyme of the thioredoxin system which protects cells against oxidative and reductive stress, forms LMA1 complex with Pbi2p, acts as a cofactor for Tsa1p, required for ER-Golgi transport and vacuole inheritance
343F04	YOR268C	1	0.289446		102.56		93.72		1	44.0298	41.0516	47.68	50.34	52.51	YOR268C			Putative protein of unknown function; sporulation is abnormal in homozygous diploid; YOR268C is not an essential gene
346H10	YGL157W	1	0.289503		101.5		93.86		1	42.6498	39.6296	49.48	51.16	44.3	YGL157W	ARI1		NADPH-dependent aldehyde reductase, utilizes aromatic and alophatic aldehyde substrates; member of the short-chain dehydrogenase/reductase superfamily
340H08	YIR003W	1	0.289505		100.25		93.03		1	42.926	39.6296	44.42	46.89	49.78	YIR003W	AIM21		Protein of unknown function involved in mitochondrial migration along actin filament; may interact with ribosomes; GFP-fusion protein colocalizes with Sac1p to the actin cytoskeleton
336D10	YJR035W	1	0.289528		102.71		92.86		1	44.3471	41.6297	51.7	54.43	47.05	YJR035W	RAD26		Protein involved in transcription-coupled nucleotide excision repair of UV-induced DNA lesions; recruitment to DNA lesions is dependent on an elongating RNA polymerase II; homolog of human CSB protein
336D03	YJR021C	1	0.289562		89.32		83.08		1	43.623	40.1944	53.84	57.15	55.27	YJR021C	REC107	MER2	Protein involved in early stages of meiotic recombination; involved in coordination between the initiation of recombination and the first division of meiosis; part of a complex (Rec107p-Mei4p-Rec114p) required for ds break formation
347E06	YER152C	1	0.289627		104.77		94.92		1	46.2683	43.0989	49.65	51.67	48.87	YER152C			Protein with 2-aminoadipate transaminase activity; shares amino acid similarity with the aminotransferases Aro8p and Aro9p; YER152C is not an essential gene
332D07	YJL065C	1	0.289639		100.37		91.07		1	41.9499	38.7924	52.75	54.05	54.36	YJL065C	DLS1		Subunit of ISW2/yCHRAC chromatin accessibility complex along with Itc1p, Isw2p, and Dpb4p; involved in inheritance of telomeric silencing
339G05	YBR015C	1	0.289682		89.54		82.9		1	45.3994	41.0516	46.28	51.2	47.95	YBR015C	MNN2	TTP1 LDB8 CRV4	Alpha-1,2-mannosyltransferase, responsible for addition of the first alpha-1,2-linked mannose to form the branches on the mannan backbone of oligosaccharides, localizes to an early Golgi compartment
347A02	YGL161C	1	0.2897		102.96		93.06		1	44.2779	40.1944	46.11	48.51	48.87	YGL161C	YIP5		Protein that interacts with Rab GTPases, localized to late Golgi vesicles; computational analysis of large-scale protein-protein interaction data suggests a possible role in vesicle-mediated transport
332A10	YJL120W	1	0.2898		101.54		92.19		5	43.31	40.1944	57.8	58.56	51.6	YJL120W
331D12	YPR014C	1	0.289847		89.26		80.58		1	43.6204	41.0516	45.4	48	46.11	YPR014C
309F11	YBR204C	1	0.289869		108.59		98.85		1	46.073	42.5071	50.5	53.36	50.7	YBR204C			Serine hydrolase; YBR204C is not an essential gene
307D11	YOL012C	1	0.289891		103.24		95.77		1	45.7732	41.6297	44.09	46.48	44.3	YOL012C	HTZ1	H2A.F/Z H2AZ HTA3	Histone variant H2AZ, exchanged for histone H2A in nucleosomes by the SWR1 complex; involved in transcriptional regulation through prevention of the spread of silent heterochromatin
336H04	YDL127W	1	0.289897		96.63		87.78		1	44.4956	41.0516	49.52	51.5	45.21	YDL127W	PCL2	CLN4	Cyclin, interacts with cyclin-dependent kinase Pho85p; member of the Pcl1,2-like subfamily, involved in the regulation of polarized growth and morphogenesis and progression through the cell cycle; localizes to sites of polarized cell growth
301E04	YAR003W	3	0.289933	0.0866035	105.503	3.55379	97.3167	4.10312	1	47.2534	43.9967	48.03	52.95	57.08	YAR003W	SWD1	FUN16 CPS50 SAF49	Subunit of the COMPASS (Set1C) complex, which methylates histone H3 on lysine 4 and is required in transcriptional silencing near telomeres; WD40 beta propeller superfamily member with similarity to mammalian Rbbp7
348C08	YDR326C	1	0.289944		67.59		63.5		1	43.209	39.6296	47.08	49.78	51.6	YDR326C	YSP2		Protein involved in programmed cell death; mutant shows resistance to cell death induced by amiodarone or intracellular acidification
333H08	YNR056C	1	0.289973		105.88		94.61		1	45.3239	41.6297	51.83	54.08	49.78	YNR056C	BIO5		Putative transmembrane protein involved in the biotin biosynthesis pathway; responsible for uptake of 7-keto 8-aminopelargonic acid; BIO5 is in a cluster of 3 genes (BIO3, BIO4, and BIO5) that mediate biotin synthesis
314D12	YHR105W	1	0.290109		94.59		86.1		1	42.5856	40.1944	47.65	49.58	47.05	YHR105W	YPT35		Endosomal protein of unknown function that contains a phox (PX) homology domain and binds to both phosphatidylinositol-3-phosphate (PtdIns(3)P) and proteins involved in ER-Golgi or vesicular transport
311G07	YEL018W	1	0.290113		99.07		92.12		1	42.341	39.6296	60.19	53.38	55.25	YEL018W	EAF5		Esa1p-associated factor, non-essential subunit of the NuA4 acetyltransferase complex
312B02	YEL056W	3	0.290159	0.0773082	117.367	18.0336	109.493	19.7377	1	44.5004	41.0516	51.4	54.6	29.67	YEL056W	HAT2		Subunit of the Hat1p-Hat2p histone acetyltransferase complex; required for high affinity binding of the complex to free histone H4, thereby enhancing Hat1p activity; similar to human RbAp46 and 48; has a role in telomeric silencing
301F07	YAR043C	2	0.29024	0.0317021	104.125	12.0845	96.825	10.0056	1	45.4719	41.6297	53.74	57.01	54.36	YAR043C
308B09	YPL264C	1	0.29025		105.24		97.06		1	42.3895	39.6296	47.36	50.4	46.11	YPL264C			Putative membrane protein of unknown function; physically interacts with Hsp82p; YPL264C is not an essential gene
329E03	YNR073C	1	0.290262		97.44		88.27		1	43.938	41.0516	58.12	59.37	52.51	YNR073C			Putative mannitol dehydrogenase
331H10	YPR092W	1	0.290265		106.09		97.75		1	44.1559	41.0516	42.14	45.25	47.95	YPR092W
301H07	YLL038C	2	0.290267	0.00310969	101.78	8.75398	95.13	8.30143	1	41.7723	38.7924	52.17	52.71	35.17	YLL038C	ENT4		Protein of unknown function, contains an N-terminal epsin-like domain; proposed to be involved in the trafficking of Arn1p in the absence of ferrichrome
333H11	YNR059W	1	0.290283		109.31		97.73		1	43.8862	40.1944	49.52	51.63	53.43	YNR059W	MNT4		Putative alpha-1,3-mannosyltransferase, not required for protein O-glycosylation
316G05	YKL046C	1	0.290331		90.95		84.31		1	42.6628	38.7924	65.76	64.55	53.43	YKL046C	DCW1		Putative mannosidase, GPI-anchored membrane protein required for cell wall biosynthesis in bud formation;homologous to Dfg5p
306A07	YOR025W	1	0.290343		111.68		104.7		1	40.9903	38.2408	53.58	53.38	47.04	YOR025W	HST3		Member of the Sir2 family of NAD(+)-dependent protein deacetylases; involved along with Hst4p in telomeric silencing, cell cycle progression, radiation resistance, genomic stability and short-chain fatty acid metabolism
343H11	YKR102W	1	0.290385		100.98		92.46		1	42.4915	39.6296	48.67	51.87	45.21	YKR102W	FLO10		Lectin-like protein with similarity to Flo1p, thought to be involved in flocculation
301F06	YAR042W	2	0.290409	0.0383499	103.115	10.7551	96.06	8.86712	1	41.7716	38.7924	51.43	54.57	43.4	YAR042W	SWH1	OSH1 YAR044W	Protein similar to mammalian oxysterol-binding protein; contains ankyrin repeats; localizes to the Golgi and the nucleus-vacuole junction
326A07	YNL194C	1	0.290427		103		92.98		1	45.6448	41.6297	49.61	50.93	33.33	YNL194C			Integral membrane protein required for sporulation and plasma membrane sphingolipid content; has sequence similarity to SUR7 and FMP45; GFP-fusion protein is induced in response to the DNA-damaging agent MMS
331D06	YMR132C	1	0.290442		88.94		79.81		1	43.2621	40.1944	50.93	52.99	52.51	YMR132C	JLP2		Protein of unknown function, contains sequence that closely resembles a J domain (typified by the E. coli DnaJ protein)
341G12	YGR028W	1	0.290468		101.89		94.68		1	43.8292	41.0516	47.84	50.27	41.54	YGR028W	MSP1	YTA4	Mitochondrial protein involved in sorting of proteins in the mitochondria; putative membrane-spanning ATPase
311A07	YDR351W	1	0.290476		103.91		96.12		1	43.3114	40.1944	47.59	48.8	47.05	YDR351W	SBE2		Protein involved in the transport of cell wall components from the Golgi to the cell surface; required for bud growth
327F07	YIL023C	1	0.290488		102.3		92.59		1	45.4811	42.5071	55.2	55.9	44.3	YIL023C	YKE4		Zinc transporter; localizes to the ER; null mutant is sensitive to calcofluor white, leads to zinc accumulation in cytosol; ortholog of the mouse KE4 and member of the ZIP (ZRT, IRT-like Protein) family
345B12	YBR164C	1	0.290489		104.88		93.77		1	44.7147	41.6297	45.55	48.61	53.43	YBR164C	ARL1	DLP2	Soluble GTPase with a role in regulation of membrane traffic; regulates potassium influx; G protein of the Ras superfamily, similar to ADP-ribosylation factor
318B10	YOR138C	1	0.290513		86.2		79.99		1	44.0929	41.0516	49.26	51.94	49.78	YOR138C	RUP1		Protein involved in regulation of Rsp5p, which is an essential HECT ubiquitin ligase; has a WW domain consensus motif of PPPSY (residues 131-135) that mediates binding of Rsp5p to Ubp2p; contains an UBA domain
315E04	YCL056C	1	0.290525		103.45		93.49		1	48.6431	45.2132	51.23	53.91	47.05	YCL056C			Protein of unknown function; green fluorescent protein (GFP)-fusion protein localizes to the cytoplasm in a punctate pattern; null mutant displays decreased thermotolerance
342F10	YBR294W	1	0.290541		99.83		89.64		1	44.5748	41.0516	52.17	54.99	49.78	YBR294W	SUL1	SFP2	High affinity sulfate permease of the SulP anion transporter family; sulfate uptake is mediated by specific sulfate transporters Sul1p and Sul2p, which control the concentration of endogenous activated sulfate intermediates
326G11	YKR065C	1	0.290542		96.99		88.46		1	43.7645	41.0516	57.58	61.49	46.11	YKR065C	PAM17	FMP18	Constituent of the Translocase of the Inner Mitochondrial membrane (TIM23 complex); proposed alternatively to be a component of the import motor (PAM complex) or to interact with and modulate the core TIM23 complex
301C11	YAL021C	2	0.290558	0.0344026	121.905	0.714178	114.42	0.155563	3.1	63.6433	60.4763	71.77	79.86	83.55	YAL021C	CCR4	FUN27 NUT21	Component of the CCR4-NOT transcriptional complex, which is involved in regulation of gene expression; component of the major cytoplasmic deadenylase, which is involved in mRNA poly(A) tail shortening
302G07	YLR102C	3	0.290562	0.0928654	116.583	9.0994	109.2	7.87329	1	45.0002	42.5071	64.51	69.41	59.81	YLR102C	APC9		Subunit of the Anaphase-Promoting Complex/Cyclosome (APC/C), which is a ubiquitin-protein ligase required for degradation of anaphase inhibitors, including mitotic cyclins, during the metaphase/anaphase transition
332D02	YJL071W	1	0.290572		109.25		101.45		1	48.7749	45.2132	54.15	55.55	52.51	YJL071W	ARG2	HRB574	Acetylglutamate synthase (glutamate N-acetyltransferase), mitochondrial enzyme that catalyzes the first step in the biosynthesis of the arginine precursor ornithine; forms a complex with Arg5,6p
319C12	YJL170C	1	0.290625		95.68		86.93		1	43.8733	39.6296	48.84	50.8	52.51	YJL170C	ASG7		Protein that regulates signaling from a G protein beta subunit Ste4p and its relocalization within the cell; specific to a-cells and induced by alpha-factor
343D10	YIR043C	1	0.290653		100.26		91.28		1	44.4727	41.6297	46.86	48.51	46.11	YIR043C			Possible pseudogene in strain S288C; YIR043C and the adjacent ORF, YIR044C, together may encode a non-functional member of the conserved, often subtelomerically-encoded Cos protein family
307C05	YOR376W	2	0.290715	0.0281921	91.21	13.8593	82.115	12.3107	1	46.043	43.0989	51.6	53.53	52.51	YOR376W
345G06	YDL086W	1	0.290732		99.96		92.41		1	41.5935	38.2408	53.6	55.3	50.7	YDL086W			Putative protein of unknown function; the authentic, non-tagged protein is detected in highly purified mitochondria in high-throughput studies; YDL086W is not an essential gene
308C09	YPL248C	1	0.290763		103.03		95.37		1	43.4202	40.1944	47.65	50.3	45.21	YPL248C	GAL4	GAL81	DNA-binding transcription factor required for the activation of the GAL genes in response to galactose; repressed by Gal80p and activated by Gal3p
307E06	YOL020W	1	0.290788		101.86		93.36		1	51.6311	46.765	52.75	56.08	55.27	YOL020W	TAT2	LTG3 SAB2 SCM2 TAP2	High affinity tryptophan and tyrosine permease, overexpression confers FK506 and FTY720 resistance
319H05	YLR363C	1	0.290862		99.86		94.1		1	43.4811	40.1944	48.42	50.4	48.87	YLR363C	NMD4		Protein interacting with Nam7p, may be involved in the nonsense-mediated mRNA decay pathway
345A01	YBR129C	1	0.290917		103.71		95.21		1	46.0087	42.5071	42.51	44.91	39.71	YBR129C	OPY1		Protein of unknown function, overproduction blocks cell cycle arrest in the presence of mating pheromone; the authentic, non-tagged protein is detected in highly purified mitochondria in high-throughput studies
336H12	YDL135C	1	0.290935		98.22		89.04		1	43.6822	40.1944	52.78	54.15	52.51	YDL135C	RDI1		Rho GDP dissociation inhibitor involved in the localization and regulation of Cdc42p and Rho1p
325G05	YNL230C	1	0.290956		95.34		90.84		1	44.0879	41.0516	49.39	51.5	45.21	YNL230C	ELA1		Elongin A, F-box protein that forms a heterodimer with Elc1p and is required for ubiquitin-dependent degredation of the RNA Polymerase II subunit RPO21; subunit of the Elongin-Cullin-Socs (ECS) ligase complex
342A10	YJL137C	1	0.290975		99.47		90.91		1	46.5357	42.5071	47.71	49.32	47.94	YJL137C	GLG2		Self-glucosylating initiator of glycogen synthesis, also glucosylates n-dodecyl-beta-D-maltoside; similar to mammalian glycogenin
339C02	YNR006W	1	0.290989		111.35		104.61		1	47.3007	43.9967	48.18	54.97	58	YNR006W	VPS27	VPT27 SSV17 VPL23 GRD11 DID7	Endosomal protein that forms a complex with Hse1p; required for recycling Golgi proteins, forming lumenal membranes and sorting ubiquitinated proteins destined for degradation; has Ubiquitin Interaction Motifs which bind ubiquitin (Ubi4p)
335F05	YBR285W	1	0.291004		109.27		102.16		1	45.2833	41.6297	57.03	59.07	36.07	YBR285W			Putative protein of unknown function; YBR285W is not an essential gene
318G05	YOR238W	1	0.291011		93.15		84.9		1	44.2561	41.0516	50.83	54.26	56.19	YOR238W			Putative protein of unknown function; green fluorescent protein (GFP)-fusion protein localizes to the cytoplasm
335E07	YBR269C	1	0.291053		104.16		97.4		1	52.152	48.3519	61.65	63.06	60.73	YBR269C	FMP21		Putative protein of unknown function; the authentic, non-tagged protein is detected in highly purified mitochondria in high-throughput studies
324F12	YBL036C	1	0.291055		92.1		83.03		1	43.1551	40.1944	49.55	50.34	47.05	YBL036C			Putative non-specific single-domain racemase based on structural similarity; binds pyridoxal 5'-phosphate; expression of GFP-fusion protein induced in response to the DNA-damaging agent MMS
318E10	YOR214C	1	0.291084		95.11		88.7		1	43.9323	41.0516	52.34	56.36	57.98	YOR214C			Putative protein of unknown function; YOR214C is not an essential gene
309A03	YPL155C	1	0.291087		112.98		103.83		1	47.0998	43.0989	49.13	50.5	30.58	YPL155C	KIP2		Kinesin-related motor protein involved in mitotic spindle positioning, stabilizes microtubules by targeting Bik1p to the plus end; Kip2p levels are controlled during the cell cycle
310F08	YDR112W	1	0.291134		96.42		89.81		1	47.8625	44.6022	49.97	52.92	50.7	YDR112W
310A02	YBR233W	1	0.291147		99.49		92.73		1	41.1993	38.2408	50.2	51.5	48.87	YBR233W	PBP2	HEK1	RNA binding protein with similarity to mammalian heterogeneous nuclear RNP K protein, involved in the regulation of telomere position effect and telomere length
339C01	YNR005C	1	0.291189		106.05		98.14		1	45.9864	42.5071	47.15	49.65	45.21	YNR005C
323A09	YPR002W	1	0.291266		100.23		91.9		1	43.4243	40.1944	61.6	60.51	49.78	YPR002W	PDH1		Mitochondrial protein that participates in respiration, induced by diauxic shift; homologous to E. coli PrpD, may take part in the conversion of 2-methylcitrate to 2-methylisocitrate
339G08	YBR019C	1	0.291272		98.77		91.02		1	43.1276	39.6296	46.17	49.19	49.78	YBR019C	GAL10		UDP-glucose-4-epimerase, catalyzes the interconversion of UDP-galactose and UDP-D-glucose in galactose metabolism; also catalyzes the conversion of alpha-D-glucose or alpha-D-galactose to their beta-anomers
303D05	YML017W	1	0.291297		115.8		108.36		1	49.6765	46.765	62.86	66.27	66.22	YML017W	PSP2	MRS15	Asn rich cytoplasmic protein that contains RGG motifs; high-copy suppressor of group II intron-splicing defects of a mutation in MRS2 and of a conditional mutation in POL1 (DNA polymerase alpha); possible role in mitochondrial mRNA splicing
330D02	YLR037C	1	0.291324		101.94		92.94		1	45.1352	41.6297	50.04	53.02	45.21	YLR037C	PAU23	DAN2	Cell wall mannoprotein with similarity to Tir1p, Tir2p, Tir3p, and Tir4p; member of the seripauperin multigene family encoded mainly in subtelomeric regions; expressed under anaerobic conditions, completely repressed during aerobic growth
313H08	YHR001W-A	1	0.291355		88.42		81.23		1	42.5859	39.6296	54.36	55.02	48.87	YHR001W-A	QCR10		Subunit of the ubiqunol-cytochrome c oxidoreductase complex which includes Cobp, Rip1p, Cyt1p, Cor1p, Qcr2p, Qcr6p, Qcr7p, Qcr8p, Qcr9p, and Qcr10p and comprises part of the mitochondrial respiratory chain
335F06	YBR286W	1	0.29137		103.01		95.91		1	53.5165	49.647	53.43	57.19	65.29	YBR286W	APE3	APY1	Vacuolar aminopeptidase Y, processed to mature form by Prb1p
339A02	YNL010W	1	0.29137		102.75		94.4		1	42.0826	39.6296	48.49	50.61	49.78	YNL010W			Putative protein of unknown function with similarity to phosphoserine phosphatases; green fluorescent protein (GFP)-fusion protein localizes to the cytoplasm and nucleus; homozygous diploid mutant shows an increase in glycogen accumulation
342A04	YGR239C	1	0.291469		100.96		91		1	43.2811	40.1944	47.3	48.61	47.05	YGR239C	PEX21		Peroxin required for targeting of peroxisomal matrix proteins containing PTS2; interacts with Pex7p; partially redundant with Pex18p
303G01	YMR022W	2	0.291471	0.0350104	104.865	8.08223	97.06	4.63862	1	42.4232	39.6296	47.08	49.61	49.78	YMR022W	UBC7	DER2 QRI8	Ubiquitin conjugating enzyme, involved in the ER-associated protein degradation pathway; requires Cue1p for recruitment to the ER membrane; proposed to be involved in chromatin assembly
329A02	YIR039C	1	0.291564		100.56		92.19		1	45.3495	41.6297	62.43	61.26	47.05	YIR039C	YPS6		Putative GPI-anchored aspartic protease, member of the yapsin family of proteases involved in cell wall growth and maintenance
307B08	YOR363C	1	0.291585		99.31		88.9		1	44.1257	41.0516	51.5	54.36	47.94	YOR363C	PIP2	OAF2	Autoregulatory oleate-specific transcriptional activator of peroxisome proliferation, contains Zn(2)-Cys(6) cluster domain, forms heterodimer with Oaf1p, binds oleate response elements (OREs), activates beta-oxidation genes
333D11	YLR262C-A	1	0.291601		97.8		89.11		1	44.0324	41.0516	48.71	52.04	52.51	YLR262C-A	TMA7	RBF7	Protein of unknown that associates with ribosomes; null mutant exhibits translation defects, altered polyribosome profiles, and resistance to the translation inhibitor anisomcyin
339C03	YNR007C	1	0.291631		141.39		133.9		1	43.9987	41.0516	62.41	69.17	51.61	YNR007C	ATG3	AUT1 APG3	E2-like enzyme involved in autophagy and the cytoplasm-to-vacuole targeting (Cvt) pathway; plays a role in formation of Atg8p-phosphatidylethanolamine conjugates, which are involved in membrane dynamics during autophagy and Cvt
328F06	YGR279C	1	0.291672		89.51		82.81		1	45.3389	42.5071	47.84	51.33	23.29	YGR279C	SCW4		Cell wall protein with similarity to glucanases; scw4 scw10 double mutants exhibit defects in mating
336A09	YCR085W	1	0.291711		103.34		93.68		1	52.999	49.647	57.83	58.89	54.36	YCR085W
329E01	YNR071C	1	0.291766		99.73		90.15		1	44.3467	41.0516	70.42	59.29	54.35	YNR071C			Putative protein of unknown function
314B11	YHR050W	1	0.291823		94.92		86.9		1	43.0861	40.1944	50.34	53.43	27.86	YHR050W	SMF2		Divalent metal ion transporter involved in manganese homeostasis; has broad specificity for di-valent and tri-valent metals; post-translationally regulated by levels of metal ions; member of the Nramp family of metal transport proteins
310B08	YBR262C	1	0.29191		100.73		93		1	45.8446	42.5071	50.9	53.43	55.27	YBR262C	AIM5	FMP51	Protein of unknown function; the authentic, non-tagged protein is detected in purified mitochondria in high-throughput studies; null mutant displays elevated frequency of mitochondrial genome loss
315F06	YCR009C	1	0.291919		105.64		95.58		4.2	57.8691	54.7093	62.09	42.21	14.16	YCR009C	RVS161	END6 FUS7 SPE161	Amphiphysin-like lipid raft protein; interacts with Rvs167p and regulates polarization of the actin cytoskeleton, endocytosis, cell polarity, cell fusion and viability following starvation or osmotic stress
317E11	YKL147C	1	0.291953		103.05		93.27		1	42.8655	39.6296	51.53	54.99	53.43	YKL147C
323C01	YPR126C	1	0.292066		101.69		93.66		1	53.5934	47.3955	52.2	54.12	48.87	YPR126C
308D05	YPL236C	1	0.292067		106.08		97.97		1	44.286	41.6297	46.99	49.71	46.11	YPL236C
340F11	YIL152W	1	0.292091		105.81		97.67		1	44.5437	40.1944	51.06	52.99	47.94	YIL152W			Putative protein of unknown function
333A05	YJR073C	1	0.292134		101.88		92.62		1	43.5567	40.1944	62.62	54.43	53.43	YJR073C	OPI3	PEM2	Phospholipid methyltransferase (methylene-fatty-acyl-phospholipid synthase), catalyzes the last two steps in phosphatidylcholine biosynthesis
343D11	YIR044C	1	0.292142		99.28		90.46		1	42.9709	39.6296	48.64	50.44	48.87	YIR044C			Possible pseudogene in strain S288C; YIR044C and the adjacent ORF, YIR043C, together may encode a non-functional member of the conserved, often subtelomerically-encoded Cos protein family
336F09	YDL099W	1	0.292177		99.1		90.54		1	42.4253	38.7924	51.57	54.54	51.6	YDL099W	BUG1		Cis-golgi localized protein involved in ER to Golgi transport; forms a complex with the mammalian GRASP65 homolog, Grh1p; mutants are compromised for the fusion of ER-derived vesicles with Golgi membranes
342G09	YCR062W	1	0.292192		96.07		85.89		1	35.9695	33.0101	43.1	45.03	36.99	YCR062W
332H05	YLL007C	1	0.292249		94.61		85.65		1	45.0496	41.0516	41.54	42.63	33.33	YLL007C			Putative protein of unknown function; green fluorescent protein (GFP)-fusion protein localizes to the cytoplasm; YLL007C is not an essential gene
311F05	YEL003W	1	0.292308		108.62		100.65		4.4	53.3886	49.647	52.3	55.45	47.04	YEL003W	GIM4	PFD2	Subunit of the heterohexameric cochaperone prefoldin complex which binds specifically to cytosolic chaperonin and transfers target proteins to it
333H07	YNR051C	4	0.292363	0.0194137	97.355	3.13512	89.7325	2.587	1	50.5365	47.3955	58.63	58.78	53.43	YNR051C	BRE5		Ubiquitin protease cofactor, forms deubiquitination complex with Ubp3p that coregulates anterograde and retrograde transport between the endoplasmic reticulum and Golgi compartments; null is sensitive to brefeldin A
302D02	YLR044C	2	0.29241	0.12044	115.58	11.4127	110.13	8.37214	3.8	41.7014	38.7924	51.4	54.99	50.7	YLR044C	PDC1		Major of three pyruvate decarboxylase isozymes, key enzyme in alcoholic fermentation, decarboxylates pyruvate to acetaldehyde; subject to glucose-, ethanol-, and autoregulation; involved in amino acid catabolism
342D02	YKR023W	1	0.292416		102.64		92.36		1	44.5625	40.1944	51.53	54.29	49.78	YKR023W			Putative protein of unknown function; the authentic, non-tagged protein is detected in highly purified mitochondria in high-throughput studies
316B02	YLR177W	1	0.292461		83.52		77.42		1	49.0283	46.1401	64.34	56.75	54.35	YLR177W			Putative protein of unknown function; phosphorylated by Dbf2p-Mob1p in vitro; some strains contain microsatellite polymophisms at this locus; YLR177W is not an essential gene
327G05	YIL037C	1	0.292472		99.76		89.7		1	44.7925	42.5071	58.63	60.14	49.78	YIL037C	PRM2		Pheromone-regulated protein, predicted to have 4 transmembrane segments and a coiled coil domain; regulated by Ste12p; required for efficient nuclear fusion
308A04	YGR078C	1	0.292515		116.87		110.08		3.7	58.6255	54.7093	53.19	54.4	39.71	YGR078C	PAC10	PFD3 GIM2 RKS2	Part of the heteromeric co-chaperone GimC/prefoldin complex, which promotes efficient protein folding
340A09	YBR046C	1	0.292532		108.25		99.91		1	44.5122	41.0516	46.33	47.52	47.05	YBR046C	ZTA1		NADPH-dependent quinone reductase, GFP-tagged protein localizes to the cytoplasm and nucleus; has similarity to E. coli quinone oxidoreductase and to human zeta-crystallin
324E09	YBL010C	1	0.292553		94.31		84.98		1	43.3351	40.1944	54.54	56.68	48.87	YBL010C			Putative protein of unknown function; green fluorescent protein (GFP)-fusion protein colocalizes with clathrin-coated vesicles
327A11	YDR272W	1	0.292592		94.12		86		1	43.9102	41.0516	49.22	50.97	49.78	YDR272W	GLO2		Cytoplasmic glyoxalase II, catalyzes the hydrolysis of S-D-lactoylglutathione into glutathione and D-lactate
309G06	YBR213W	1	0.292605		107.36		97.3		1	45.4138	42.5071	48.9	50.93	48.87	YBR213W	MET8		Bifunctional dehydrogenase and ferrochelatase, involved in the biosynthesis of siroheme, a prosthetic group used by sulfite reductase; required for sulfate assimilation and methionine biosynthesis
332F09	YGR188C	1	0.292672		125.83		113.18		3.8	49.2161	44.6022	49.09	50.83	40.65	YGR188C	BUB1		Protein kinase that forms a complex with Mad1p and Bub3p that is crucial in the checkpoint mechanism required to prevent cell cycle progression into anaphase in the presence of spindle damage, associates with centromere DNA via Skp1p
326B08	YNL159C	1	0.292676		101.17		92.14		1	43.7074	39.6296	45.31	47.71	41.54	YNL159C	ASI2		Integral inner nuclear membrane protein that acts with Asi1p and Asi3p to ensure the fidelity of SPS-sensor signalling by maintaining the dormant repressed state of gene expression in the absence of inducing signals
304H08	YMR273C	2	0.292699	0.0602385	94.25	2.31931	87.36	1.65463	1	48.602	45.2132	51.2	54.57	48.87	YMR273C	ZDS1	CKM1 CES1 NRC1 OSS1	Protein with a role in regulating Swe1p-dependent polarized growth; interacts with silencing proteins at the telomere; has a role in Bcy1p localization; implicated in mRNA nuclear export; involved in mitotic exit through Cdc14p regulation
315A06	YHR198C	1	0.292794		83.8		76.82		1	43.061	39.6296	52.78	55.13	56.19	YHR198C	AIM18	FMP22	Putative protein of unknown function; the authentic, non-tagged protein is detected in highly purified mitochondria in high-throughput studies; null mutant displays elevated frequency of mitochondrial genome loss
340G04	YIL157C	1	0.292887		104.77		95.61		1	44.7395	41.0516	44.3	45.55	26.03	YIL157C	COA1	FMP35	Mitochondrial inner membrane protein required for assembly of the cytochrome c oxidase complex (complex IV); interacts with complex IV assembly factor Shy1p during the early stages of assembly
332G03	YHR004C	1	0.292894		105.89		98.15		1	45.4673	41.6297	51.73	55.51	47.94	YHR004C	NEM1		Probable catalytic subunit of Nem1p-Spo7p phosphatase holoenzyme; regulates nuclear growth by controlling phospholipid biosynthesis, required for normal nuclear envelope morphology and sporulation; homolog of the human protein Dullard
345C06	YDL009C	1	0.292905		101.82		93.38		1	44.8812	41.0516	47.84	50.17	51.6	YDL009C
343H12	YLR110C	2	0.292906	0.137996	84.675	10.0197	79.385	10.8541	1	42.8463	40.1944	47.3	49.81	51.6	YLR110C	CCW12		Cell wall mannoprotein with a role in maintenance of newly synthesized areas of cell wall; localizes to periphery of small buds, septum region of larger buds, and shmoo tip
338G04	YGL217C	1	0.29303		110.57		102.26		1	46.3489	43.0989	50.07	54.36	51.61	YGL217C
317H08	YOR105W	1	0.293091		82.36		75.53		1	44.2978	41.0516	47.68	48.9	47.05	YOR105W
331E08	YPR030W	1	0.293097		109.81		102.15		1	44.6394	41.6297	50.27	52.17	53.43	YPR030W	CSR2	MRG19 ART8	Nuclear protein proposed to regulate utilization of nonfermentable carbon sources and endocytosis of plasma membrane proteins; overproduction suppresses chs5 spa2 lethality at high temp; ubiquitinated by Rsp5p, deubiquitinated by Ubp2p
328D10	YFR016C	1	0.293101		91.71		82.61		1	44.5621	41.0516	46.08	49.22	48.87	YFR016C			Putative protein of unknown function; green fluorescent protein (GFP)-fusion protein localizes to the cytoplasm and bud; interacts with Spa2p; YFL016C is not an essential gene
314F10	YHR135C	1	0.293138		92.62		83.75		1	42.1631	38.7924	50.47	52.75	53.43	YHR135C	YCK1	CKI2	Palmitoylated plasma membrane-bound casein kinase I isoform; shares redundant functions with Yck2p in morphogenesis, proper septin assembly, endocytic trafficking; provides an essential function overlapping with that of Yck2p
332F08	YER066W	1	0.293159		103.38		94.45		1	44.089	40.1944	52.34	54.05	50.7	YER066W	RRT13		Putative protein of unknown function; non-essential gene identified in a screen for mutants with decreased levels of rDNA transcription
341C10	YFR013W	1	0.293179		107.68		100.3		1	45.0321	41.6297	49.09	50.6	49.78	YFR013W	IOC3		Member of a complex (Isw1a) with Isw1p that has nucleosome-stimulated ATPase activity and represses transcription initiation by specific positioning of a promoter proximal dinucleosome; has homology to Esc8p, which is involved in silencing
322G03	YPL049C	1	0.293198		149.78		146.62		1	48.9909	43.9967	73.88	65.31	27.86	YPL049C	DIG1	RST1	MAP kinase-responsive inhibitor of the Ste12p transcription factor, involved in the regulation of mating-specific genes and the invasive growth pathway; related regulators Dig1p and Dig2p bind to Ste12p
310A01	YBR231C	1	0.293369		106.72		99.1		1	47.5862	43.0989	49.32	49.91	47.94	YBR231C	SWC5	AOR1	Protein of unknown function, component of the SWR1 complex, which exchanges histone variant H2AZ (Htz1p) for chromatin-bound histone H2A
325H12	YNL201C	1	0.293371		109.67		101.06		1	49.077	45.2132	51.87	53.4	51.6	YNL201C	PSY2		Putative subunit of an evolutionarily conserved protein phosphatase complex containing the catalytic subunit Pph3p and the regulatory subunit Psy4p; required for cisplatin and oxaliplatin resistance; putative homolog of mammalian R3
340B02	YBR052C	1	0.293379		105.21		95.97		1	43.9949	41.0516	46.48	48.45	43.4	YBR052C	RFS1		Protein of unknown function; member of a flavodoxin-like fold protein family that includes Pst2p and Ycp4p; green fluorescent protein (GFP)-fusion protein localizes to the cytoplasm in a punctate pattern
332F04	YEL012W	1	0.293444		107		98.22		1	46.8147	43.0989	68.07	60.04	59.82	YEL012W	UBC8	GID3	Ubiquitin-conjugating enzyme that negatively regulates gluconeogenesis by mediating the glucose-induced ubiquitination of fructose-1,6-bisphosphatase (FBPase); cytoplasmic enzyme that catalyzes the ubiquitination of histones in vitro
308A10	YOL083W	1	0.293568		109.02		100.67		1	42.924	39.6296	51.16	53.95	52.51	YOL083W	ATG34	ATG19-B	Receptor protein involved in selective autophagy during starvation; specifically involved in the transport of cargo protein alpha-mannosidase (Ams1p); Atg19p paralog
346F04	YGL114W	1	0.293577		104.77		97.6		1	43.9341	40.1944	48.83	51.06	48.87	YGL114W			Putative protein of unknown function; predicted member of the oligopeptide transporter (OPT) family of membrane transporters
314C05	YHR075C	1	0.293603		102.92		93.61		1	46.6651	43.0989	54.64	58.56	58.93	YHR075C	PPE1	YmS2 MRPS2	Protein with carboxyl methyl esterase activity that may have a role in demethylation of the phosphoprotein phosphatase catalytic subunit; also identified as a small subunit mitochondrial ribosomal protein
334C02	YGR018C	1	0.293611		98.18		91.42		1	46.4797	42.5071	53.05	55.69	56.19	YGR018C
342E07	YBR100W	1	0.293612		97.66		89.74		1	45.9785	42.5071	50.3	52.14	44.3	YBR100W
341A05	YNL144C	1	0.293712		103.85		96.06		1	44.3945	41.0516	43.88	45.89	48.87	YNL144C			Putative protein of unknown function; the authentic, non-tagged protein is detected in highly purified mitochondria in high-throughput studies; YNL144C is not an essential gene
305H05	YOR011W	1	0.293744		100.67		92.81		1	45.4149	41.0516	46.81	47.53	48.87	YOR011W	AUS1		Transporter of the ATP-binding cassette family, involved in uptake of sterols and anaerobic growth
317B03	YKL090W	1	0.293867		102.76		93.97		1	43.6696	40.1944	51.73	54.22	57.08	YKL090W	CUE2		Protein of unknown function; has two CUE domains that bind ubiquitin, which may facilitate intramolecular monoubiquitination
321F10	YGL200C	1	0.293875		97.42		88.5		1	44.1564	41.0516	48.06	51.94	53.43	YGL200C	EMP24	BST2	Integral membrane component of endoplasmic reticulum-derived COPII-coated vesicles, which function in ER to Golgi transport
347A05	YGL165C	1	0.293961		103.52		93		1	43.6265	40.1944	48.26	50.14	46.11	YGL165C
349A06	YPR151C	1	0.293987		100.32		90.09		1	47.4111	43.0989	46.14	50.14	50.7	YPR151C	SUE1		Mitochondrial protein required for degradation of unstable forms of cytochrome c
304G11	YMR261C	2	0.293997	0.00684068	93.28	2.16375	86.87	1.78191	1	45.5644	42.5071	45.86	48.54	48.87	YMR261C	TPS3		Regulatory subunit of trehalose-6-phosphate synthase/phosphatase complex, which synthesizes the storage carbohydrate trehalose; expression is induced by stress conditions and repressed by the Ras-cAMP pathway
342F03	YBR272C	1	0.294007		101.89		92.59		1	45.2088	41.6297	52.68	56.33	47.94	YBR272C	HSM3		Proteasome-interacting protein involved in the assembly of the base subcomplex of the 19S proteasomal regulatory particle (RP); involved in DNA mismatch repair during slow growth; weak similarity to Msh1p; related to human 19S subunit S5b
325E03	YGL058W	1	0.294125		127.09		117.86		7	44.1429	41.0516	65.31	56.82	44.3	YGL058W	RAD6	PSO8 UBC2	Ubiquitin-conjugating enzyme (E2), involved in postreplication repair (as a heterodimer with Rad18p), DSBR and checkpoint control (as a heterodimer with Bre1p), ubiquitin-mediated N-end rule protein degradation (as a heterodimer with Ubr1p
326A05	YNL196C	1	0.29415		109.38		98.79		1	44.0859	41.0516	54.85	56.97	51.6	YNL196C	SLZ1		Sporulation-specific protein with a leucine zipper motif
342A06	YGR250C	1	0.294171		100.33		90.63		1	42.5617	39.6296	40.68	43.1	47.05	YGR250C			Putative RNA binding protein; localizes to stress granules induced by glucose deprivation; interacts with Rbg1p in a two-hybrid
332B01	YJL119C	1	0.294189		102.92		93.53		1	43.0806	40.1944	47.05	48.54	42.48	YJL119C
343D08	YIR030C	1	0.294206		103.12		93.71		1	43.8043	40.1944	47.49	50.01	47.94	YIR030C	DCG1		Protein of unknown function, expression is sensitive to nitrogen catabolite repression and regulated by Dal80p; contains transmembrane domain
342H09	YDR071C	1	0.294209		95.32		85.75		1	44.3317	41.0516	40.31	43.01	40.65	YDR071C	PAA1		Polyamine acetyltransferase; acetylates polyamines (e.g. putrescine, spermidine, spermine) and also aralkylamines (e.g. tryptamine, phenylethylamine); may be involved in transcription and/or DNA replication
342E02	YML035C	1	0.294221		97.24		88.48		1	46.7717	43.0989	54.08	57.22	48.87	YML035C	AMD1	AMD3	AMP deaminase, tetrameric enzyme that catalyzes the deamination of AMP to form IMP and ammonia; may be involved in regulation of intracellular adenine nucleotide pools
308B06	YPL269W	1	0.294233		146.77		137.42		1	45.0227	41.0516	58.56	64.28	73.54	YPL269W	KAR9		Karyogamy protein required for correct positioning of the mitotic spindle and for orienting cytoplasmic microtubules, localizes at the shmoo tip in mating cells and at the tip of the growing bud in small-budded cells through anaphase
332G01	YHL039W	1	0.294309		103.83		94.78		1	45.7755	42.5071	47.71	49.61	45.21	YHL039W	EFM1		Probable lysine methyltransferase involved in the monomethylation of eEF1A (Tef1p/Tef2p); SET-domain family member; predicted involvement in ribosome biogenesis; green fluorescent protein (GFP)-fusion protein localizes to the cytoplasm
310E01	YDR090C	1	0.294326		99.97		93.83		1	43.8853	41.0516	51.77	52.75	47.94	YDR090C			Putative protein of unknown function
332F10	YGR201C	1	0.294386		101.39		92.84		1	45.3408	41.6297	55.69	57.62	54.36	YGR201C			Putative protein of unknown function
340F04	YIL139C	1	0.29447		104.44		95.58		1	44.0906	40.1944	50.01	52.07	47.05	YIL139C	REV7		Accessory subunit of DNA polymerase zeta, involved in translesion synthesis during post-replication repair; required for mutagenesis induced by DNA damage; involved in double-strand break repair
346B03	YDR470C	1	0.294503		100.92		93.63		1	34.6305	31.0593	49.39	50.73	51.6	YDR470C	UGO1		Outer membrane component of the mitochondrial fusion machinery; binds directly to Fzo1p and Mgm1p and thus links these two GTPases during mitochondrial fusion; facilitates dimerization of Fzo1p during fusion
303A11	YML078W	2	0.294542	0.070876	102.36	17.2817	94.56	15.6836	1	43.7495	40.1944	48.61	50.73	40.65	YML078W	CPR3	CYP3	Mitochondrial peptidyl-prolyl cis-trans isomerase (cyclophilin), catalyzes the cis-trans isomerization of peptide bonds N-terminal to proline residues; involved in protein refolding after import into mitochondria
314C08	YHR078W	1	0.294615		95.02		86.27		1	44.2106	41.0516	54.26	58.52	51.6	YHR078W			High osmolarity-regulated gene of unknown function
325D12	YGL053W	1	0.294628		92.76		88.62		1	44.2345	40.1944	49.19	52	51.6	YGL053W	PRM8		Pheromone-regulated protein with 2 predicted transmembrane segments and an FF sequence, a motif involved in COPII binding; forms a complex with Prp9p in the ER; member of DUP240 gene family
304B08	YMR172C-A	1	0.294688		109.16		99.65		1	43.7026	40.1944	46.02	48.61	49.78	YMR172C-A
346B09	YDR481C	1	0.294701		101.68		93.87		1	44.2614	41.0516	52.2	53.84	51.6	YDR481C	PHO8	phoH	Repressible vacuolar alkaline phosphatase; regulated by levels of Pi and by Pho4p, Pho9p, Pho80p, Pho81p and Pho85p; dephosphorylates phosphotyrosyl peptides; contributes to NAD+ metabolism by producing nicotinamide riboside from NMN
331D03	YMR127C	1	0.294737		92.55		83.76		1	43.8352	41.0516	57.92	51.82	48.87	YMR127C	SAS2	KAT8	Histone acetyltransferase (HAT) catalytic subunit of the SAS complex (Sas2p-Sas4p-Sas5p), which acetylates free histones and nucleosomes and regulates transcriptional silencing; member of the MYSTacetyltransferase family
347A12	YGL177W	1	0.294738		102.04		91.29		1	43.7284	40.1944	47.52	49.88	49.78	YGL177W
330C04	YLL048C	1	0.294759		103.58		94.82		1	45.3471	41.6297	50.93	53.77	48.87	YLL048C	YBT1	BAT1	Transporter of the ATP-binding cassette (ABC) family involved in bile acid transport; similar to mammalian bile transporters
341D02	YNL065W	1	0.294786		101.86		94.99		1	45.4417	41.6297	59.96	60.1	50.7	YNL065W	AQR1		Plasma membrane multidrug transporter of the major facilitator superfamily, confers resistance to short-chain monocarboxylic acids and quinidine; involved in the excretion of excess amino acids
316B11	YLR187W	1	0.294788		79.48		74.77		1	43.4691	40.1944	47.84	50.9	51.6	YLR187W	SKG3		Protein of unknown function; green fluorescent protein (GFP)-fusion protein localizes to the cell periphery, cytoplasm, bud, and bud neck; potential Cdc28p substrate; similar to Caf120p and Skg4p
336F02	YJR058C	2	0.294797	0.0177071	86.76	3.33754	79.425	3.42947	1	43.794	41.0516	65.05	56.32	54.35	YJR058C	APS2	YAP17	Small subunit of the clathrin-associated adaptor complex AP-2, which is involved in protein sorting at the plasma membrane; related to the sigma subunit of the mammalian plasma membrane clathrin-associated protein (AP-2) complex
330D01	YLR036C	1	0.294803		100.01		91.22		1	44.5091	41.6297	49.09	50.73	45.21	YLR036C			Putative protein of unknown function predicted to have transmembrane domains; interacts with HSP90 by yeast two-hybrid analysis; YLR036C is not an essential protein
311F10	YEL008W	1	0.294821		96.13		88.97		1	42.4267	38.7924	46.72	48.73	52.51	YEL008W
343B06	YML047C	1	0.294825		94.46		86.55		1	43.5338	40.1944	48.16	50.53	50.7	YML047C	PRM6		Pheromone-regulated protein, predicted to have 2 transmembrane segments; regulated by Ste12p during mating
343H08	YKR094C	1	0.294831		99.2		91.03		1	46.4403	41.6297	47.65	50.9	49.78	YKR094C	RPL40B	UBI2 L40B UB12 CEP52B	Fusion protein, identical to Rpl40Ap, that is cleaved to yield ubiquitin and a ribosomal protein of the large (60S) ribosomal subunit with similarity to rat L40; ubiquitin may facilitate assembly of the ribosomal protein into ribosomes
310E03	YDR093W	1	0.294849		99.89		92.42		1	43.6879	41.0516	49.97	54.02	57.08	YDR093W	DNF2		Aminophospholipid translocase (flippase) that localizes primarily to the plasma membrane; contributes to endocytosis, protein transport and cell polarity; type 4 P-type ATPase
315D06	YCL042W	1	0.294868		103.91		92.8		1	45.078	42.5071	45.09	47.02	48.87	YCL042W			Putative protein of unknown function; epitope-tagged protein localizes to the cytoplasm
310G12	YDR133C	1	0.294892		90.2		84.38		1	43.0207	40.1944	74.62	65.22	57.09	YDR133C
308B02	YPL273W	1	0.294933		103.84		95.12		1	44.5303	41.0516	51.93	46.8	38.81	YPL273W	SAM4		S-adenosylmethionine-homocysteine methyltransferase, functions along with Mht1p in the conversion of S-adenosylmethionine (AdoMet) to methionine to control the methionine/AdoMet ratio
345F06	YDL072C	1	0.294958		101.98		94.57		1	#N/A	#N/A	42.42	45.18	46.11	YDL072C	YET3		Protein of unknown function; YET3 null mutant decreases the level of secreted invertase; homolog of human BAP31 protein
333E09	YLR433C	1	0.295034		97.27		88.75		1	43.3708	40.1944	46.11	49.71	49.78	YLR433C	CNA1	CMP1	Calcineurin A; one isoform (the other is CMP2) of the catalytic subunit of calcineurin, a Ca++/calmodulin-regulated protein phosphatase which regulates Crz1p (a stress-response transcription factor), the other calcineurin subunit is CNB1
334D11	YJR107W	1	0.295173		97.93		91.37		1	44.559	40.1944	50.47	53.19	52.51	YJR107W			Putative protein of unknown function; has sequence or structural similarity to lipases
323E11	YPR179C	1	0.295186		93.6		86.25		1	46.7841	43.9967	51.16	53.71	54.36	YPR179C	HDA3	PLO1	Subunit of a possibly tetrameric trichostatin A-sensitive class II histone deacetylase complex that contains an Hda1p homodimer and an Hda2p-Hda3p heterodimer; required for the activity of the complex; has similarity to Hda2p
333G07	YML010C-B	1	0.295191		102.12		94.23		14.1	45.2179	41.6297	53.29	53.36	50.7	YML010C-B
329C07	YMR073C	1	0.295197		101.94		92.41		1	43.8907	41.0516	62.85	62.4	53.43	YMR073C	IRC21		Putative protein of unknown function; proposed to be involved in resistance to carboplatin and cisplatin; shares similarity to a human cytochrome oxidoreductase; null mutant displays increased levels of spontaneous Rad52p foci
331H09	YPR090W	1	0.295201		100.73		92.74		1	43.8059	40.1944	59.86	52.63	48.87	YPR090W
331E12	YPR039W	1	0.295212		111.61		102.46		1	45.1827	41.6297	51.3	53.05	51.6	YPR039W
307C08	YOR380W	2	0.295221	0.0529686	92.365	13.5552	83.075	11.943	1	47.3786	43.9967	49.75	51.63	47.05	YOR380W	RDR1		Transcriptional repressor involved in the control of multidrug resistance; negatively regulates expression of the PDR5 gene; member of the Gal4p family of zinc cluster proteins
314G08	YHR152W	1	0.295278		111.28		104.72		1	45.3974	42.5071	51.3	53.84	51.6	YHR152W	SPO12		Nucleolar protein of unknown function, positive regulator of mitotic exit; involved in regulating release of Cdc14p from the nucleolus in early anaphase, may play similar role in meiosis
347D06	YER135C	1	0.295282		101.05		90.84		1	44.6482	41.0516	50.2	52.2	50.7	YER135C
316B08	YLR183C	1	0.295283		81.07		75.57		1	42.6333	39.6296	46.77	50.77	21.46	YLR183C	TOS4		Forkhead Associated domain containing protein and putative transcription factor found associated with chromatin; target of SBF transcription factor; expression is periodic and peaks in G1; similar to PLM2
339D02	YNR024W	1	0.295292		98.07		90.36		1	43.8246	40.1944	46.33	47.74	42.47	YNR024W	MPP6		Nuclear exosome-associated RNA binding protein; involved in surveillance of pre-rRNAs and pre-mRNAs, and the degradation of cryptic non-coding RNAs (ncRNA); copurifies with ribosomes
331A04	YML118W	1	0.29534		91.6		82.03		1	42.2625	39.6296	52.14	52.31	47.05	YML118W	NGL3		Putative endonuclease, has a domain similar to a magnesium-dependent endonuclease motif in mRNA deadenylase Ccr4p; similar to Ngl1p and Ngl2p
302G03	YLR096W	2	0.295409	0.0398241	101.52	12.7562	96.125	9.0439	1	44.1604	41.0516	55.55	60.89	60.74	YLR096W	KIN2		Serine/threonine protein kinase involved in regulation of exocytosis; localizes to the cytoplasmic face of the plasma membrane; closely related to Kin1p
340F08	YIL146C	1	0.29548		103.71		94.38		1	44.6213	40.1944	45.52	47.43	47.05	YIL146C	ATG32	ECM37	Mitochondrial-anchored transmembrane receptor that interacts with the autophagy adaptor protein, Atg11p, and is essential for mitophagy, the selective vacuolar degradation of mitochondria in response to starvation
323C03	YPR128C	1	0.295511		96.48		88.77		1	41.989	38.7924	52.61	53.5	47.05	YPR128C	ANT1		Peroxisomal adenine nucleotide transporter; involved in beta-oxidation of medium-chain fatty acid; required for peroxisome proliferation
311A12	YDR358W	1	0.295552		105.73		96.86		1	44.6074	41.6297	52.61	52.71	38.82	YDR358W	GGA1		Golgi-localized protein with homology to gamma-adaptin, interacts with and regulates Arf1p and Arf2p in a GTP-dependent manner in order to facilitate traffic through the late Golgi
315B04	YHR210C	1	0.295572		84.49		77.13		1	42.4016	38.7924	47.84	50.34	56.19	YHR210C			Putative protein of unknown function; non-essential gene; highly expressed under anaeorbic conditions; sequence similarity to aldose 1-epimerases such as GAL10
307C11	YOR383C	1	0.295588		96.56		87.04		4.8	43.9881	40.1944	48.1	50.53	29.67	YOR383C	FIT3		Mannoprotein that is incorporated into the cell wall via a glycosylphosphatidylinositol (GPI) anchor, involved in the retention of siderophore-iron in the cell wall
301F03	YAR035W	2	0.295628	0.0275858	103.905	14.3755	97.36	11.5824	1	42.5983	39.6296	47.78	51.53	51.6	YAR035W	YAT1		Outer mitochondrial carnitine acetyltransferase, minor ethanol-inducible enzyme involved in transport of activated acyl groups from the cytoplasm into the mitochondrial matrix; phosphorylated
345D01	YDL021W	1	0.295629		138.66		128.22		1	60.6383	58.2685	64.08	69.33	64.4	YDL021W	GPM2		Homolog of Gpm1p phosphoglycerate mutase, which converts 3-phosphoglycerate to 2-phosphoglycerate in glycolysis; may be non-functional derivative of a gene duplication event
320D10	YLR241W	1	0.29567		83.23		77.12		1	42.4925	39.6296	47.71	50.04	49.78	YLR241W			Putative protein of unknown function, may be involved in detoxification
349A01	YPR021C	1	0.295688		97.87		88.02		1	44.2327	41.0516	46.8	50.77	52.51	YPR021C	AGC1		Mitochondrial amino acid transporter, acts both as a glutamate uniporter and as an aspartate-glutamate exchanger; involved in nitrogen metabolism and nitrogen compound biosynthesis
301F01	YAR031W	2	0.2957	0.0592162	101.72	11.4693	94.57	9.50352	1	42.9565	38.2408	49.75	50.73	40.65	YAR031W	PRM9		Pheromone-regulated protein with 3 predicted transmembrane segments and an FF sequence, a motif involved in COPII binding; member of DUP240 gene family
314D06	YHR095W	1	0.295723		96.9		88.62		1	41.8372	39.6296	48	52.04	49.78	YHR095W
315A05	YHR195W	1	0.295741		89.05		81.52		1	43.3784	40.1944	49.78	51.73	52.51	YHR195W	NVJ1	VAB36	Nuclear envelope protein, anchored to the nuclear inner membrane, that interacts with the vacuolar membrane protein Vac8p to promote formation of nucleus-vacuole junctions during piecemeal microautophagy of the nucleus (PMN)
331A10	YML124C	2	0.295798	0.0613734	97.19	4.44063	87.755	3.58503	1	40.2012	36.0869	57.54	57.83	52.51	YML124C	TUB3		Alpha-tubulin; associates with beta-tubulin (Tub2p) to form tubulin dimer, which polymerizes to form microtubules; expressed at lower level than Tub1p
325D11	YGL050W	1	0.295803		89.06		84.1		1	45.405	41.6297	44.42	44.94	42.48	YGL050W	TYW3		tRNA methyltransferase required for synthesis of wybutosine, a modified guanosine found at the 3'-position adjacent to the anticodon of phenylalanine tRNA which supports reading frame maintenance by stabilizing codon-anticodon interactions
301D07	YAL011W	2	0.295812	0.0230944	99.915	5.53665	93.19	6.23668	1	42.1745	38.2408	49.81	54.26	45.21	YAL011W	SWC3	SWC1	Protein of unknown function, component of the SWR1 complex, which exchanges histone variant H2AZ (Htz1p) for chromatin-bound histone H2A; required for formation of nuclear-associated array of smooth endoplasmic reticulum known as karmellae
327G03	YIL035C	1	0.295891		107.35		96.98		1	48.4386	44.6022	61.98	63.51	54.36	YIL035C	CKA1	CK2 subunit	Alpha catalytic subunit of casein kinase 2 (CK2), a Ser/Thr protein kinase with roles in cell growth and proliferation; CK2, comprised of CKA1, CKA2, CKB1 and CKB2, has many substrates including transcription factors and all RNA polymerases
336H02	YDL124W	1	0.295898		98.21		89.61		1	44.0554	40.1944	51.13	51.94	49.78	YDL124W			NADPH-dependent alpha-keto amide reductase; reduces aromatic alpha-keto amides, aliphatic alpha-keto esters, and aromatic alpha-keto esters; member of the aldo-keto reductase (AKR) family
333G06	YML009C	1	0.295939		105.55		95.68		1	43.6911	40.1944	64.12	64.98	54.36	YML009C	MRPL39	YmL39	Mitochondrial ribosomal protein of the large subunit
323G07	YCR098C	1	0.295991		114.72		106.13		1	44.4318	41.0516	54.6	55.62	56.19	YCR098C	GIT1		Plasma membrane permease, mediates uptake of glycerophosphoinositol and glycerophosphocholine as sources of the nutrients inositol and phosphate; expression and transport rate are regulated by phosphate and inositol availability
345A11	YBR146W	1	0.296001		105.32		96.46		1	44.4625	40.1944	45.21	47.4	47.05	YBR146W	MRPS9		Mitochondrial ribosomal protein of the small subunit
305H10	YOR016C	1	0.296011		102.37		94.08		1	46.7871	43.0989	44.42	44.53	24.2	YOR016C	ERP4		Protein with similarity to Emp24p and Erv25p, member of the p24 family involved in ER to Golgi transport
343A09	YLR370C	1	0.296014		118.44		106.32		10.4	49.7904	46.1401	49.06	53.16	58.93	YLR370C	ARC18		Subunit of the ARP2/3 complex, which is required for the motility and integrity of cortical actin patches
323C05	YPR130C	1	0.29604		99.94		91.91		1	47.612	44.6022	70.45	58.76	52.51	YPR130C
332D10	YJL059W	1	0.296073		102.39		94.28		1	43.6093	40.1944	55.73	56.68	51.6	YJL059W	YHC3	BTN1	Vacuolar membrane protein involved in the ATP-dependent transport of arginine into the vacuole and possibly in balancing ion homeostasis; homolog of human CLN3 involved in Batten disease (juvenile onset neuronal ceroid lipofuscinosis)
317G12	YKL187C	1	0.296097		84.76		77.33		1	44.723	41.6297	51.13	52.71	45.21	YKL187C			Putative protein of unknown function; the authentic, non-tagged protein is detected in a phosphorylated state in highly purified mitochondria in high-throughput studies
342F01	YBR169C	1	0.296164		101.88		91.69		1	42.6632	39.6296	48.71	50.87	47.94	YBR169C	SSE2		Member of the heat shock protein 70 (HSP70) family; may be involved in protein folding; localized to the cytoplasm; highly homologous to the heat shock protein Sse1p
341E10	YNL095C	1	0.296244		101.68		93.37		1	45.3177	41.6297	49.48	52.17	50.7	YNL095C			Putative protein of unknown function predicted to contain a transmembrane domain; YNL095C is not an essential gene
323D05	YPR149W	1	0.296281		99.68		91.88		1	44.9066	41.6297	54.4	57.22	48.87	YPR149W	NCE102	NCE2	Protein of unknown function; contains transmembrane domains; involved in secretion of proteins that lack classical secretory signal sequences; component of the detergent-insoluble glycolipid-enriched complexes (DIGs)
306B05	YOR036W	1	0.296288		125.08		119.4		1	47.1589	43.0989	63.75	54	32.42	YOR036W	PEP12	VPL6 VPT13 VPS6	Target membrane receptor (t-SNARE) for vesicular intermediates traveling between the Golgi apparatus and the vacuole; controls entry of biosynthetic, endocytic, and retrograde traffic into the prevacuolar compartment; syntaxin
303B08	YML055W	1	0.296337		111.09		103.1		1	44.0426	41.0516	46.7	50.9	50.7	YML055W	SPC2	SPY1	Subunit of signal peptidase complex (Spc1p, Spc2p, Spc3p, Sec11p), which catalyzes cleavage of N-terminal signal sequences of proteins targeted to the secretory pathway; homologous to mammalian SPC25
308G06	YPL182C	1	0.296371		104.91		96.17		1	48.4615	44.6022	48.64	52.17	45.21	YPL182C
308H05	YPL167C	1	0.29642		107.51		98.25		1	47.03	43.0989	54.98	47.04	47.95	YPL167C	REV3	PSO1	Catalytic subunit of DNA polymerase zeta, involved in translesion synthesis during post-replication repair; required for mutagenesis induced by DNA damage; involved in double-strand break repair
327G02	YIL034C	1	0.296475		99.98		90.64		4.5	50.4631	47.3955	58.82	59.4	49.78	YIL034C	CAP2		Beta subunit of the capping protein (CP) heterodimer (Cap1p and Cap2p) which binds to the barbed ends of actin filaments preventing further polymerization; localized predominantly to cortical actin patches
345E08	YDL054C	1	0.296548		101.01		92.28		1	43.002	39.6296	50.73	51.67	49.78	YDL054C	MCH1		Protein with similarity to mammalian monocarboxylate permeases, which are involved in transport of monocarboxylic acids across the plasma membrane; mutant is not deficient in monocarboxylate transport
341B09	YNL101W	1	0.296572		103.08		94.95		1	43.2756	40.1944	48.22	50.2	49.78	YNL101W	AVT4		Vacuolar transporter, exports large neutral amino acids from the vacuole; member of a family of seven S. cerevisiae genes (AVT1-7) related to vesicular GABA-glycine transporters
341B11	YNL094W	1	0.296587		105.55		96.6		1	45.5959	41.0516	48.77	50.5	47.94	YNL094W	APP1		Protein of unknown function, interacts with Rvs161p and Rvs167p; computational analysis of protein-protein interactions in large-scale studies suggests a possible role in actin filament organization
339D04	YNR025C	1	0.296632		98.73		92.07		1	46.9662	42.5071	49.66	51.72	31.51	YNR025C
316H09	YKL066W	1	0.296646		99.16		91.73		1	43.2444	40.1944	53.33	52.71	46.11	YKL066W
333C02	YJR146W	1	0.296656		97.76		89.37		1	40.3572	36.0869	52.1	55.02	52.51	YJR146W
301D01	YAL019W	2	0.296687	0.0260382	108.81	4.94975	102.535	3.95273	1	42.7624	38.7924	50.53	51.57	45.21	YAL019W	FUN30		Conserved member of the Snf2p family with ATP-dependent chromatin remodeling activity; has a role in silencing; potential Cdc28p substrate; authentic, non-tagged protein is detected in purified mitochondria in high-throughput studies
342F08	YBR288C	1	0.296763		92.16		84.77		1	43.3891	40.1944	49.19	51.67	44.3	YBR288C	APM3	YKS6	Mu3-like subunit of the clathrin associated protein complex (AP-3); functions in transport of alkaline phosphatase to the vacuole via the alternate pathway
302H08	YLR121C	2	0.296786	0.0551626	100.67	10.0551	94.84	6.43467	1	42.6904	39.6296	53.05	55.9	45.21	YLR121C	YPS3	YPS4	Aspartic protease, member of the yapsin family of proteases involved in cell wall growth and maintenance; attached to the plasma membrane via a glycosylphosphatidylinositol (GPI) anchor
303C06	YML035C-A	1	0.296786		109.75		102.89		1	45.2366	41.6297	48.96	53.5	56.19	YML035C-A
331A05	YML119W	1	0.296838		91.98		82.68		1	41.7003	38.7924	50.83	50.87	41.54	YML119W			Putative protein of unknown function; YML119W is not an essential gene; potential Cdc28p substrate
317H05	YOR099W	1	0.296842		82.43		75.41		1	45.2343	42.5071	49.09	50.67	47.05	YOR099W	KTR1		Alpha-1,2-mannosyltransferase involved in O- and N-linked protein glycosylation; type II membrane protein; member of the KRE2/MNT1 mannosyltransferase family
339B10	YNR001C	1	0.296859		99.15		91.4		1	42.7494	39.6296	46.97	47.87	30.59	YNR001C	CIT1	CS1 LYS6	Citrate synthase, catalyzes the condensation of acetyl coenzyme A and oxaloacetate to form citrate; the rate-limiting enzyme of the TCA cycle; nuclear encoded mitochondrial protein
309G10	YBR217W	1	0.296889		107.17		97.52		1	42.5799	39.6296	46.95	50.24	53.43	YBR217W	ATG12	APG12	Conserved ubiquitin-like modifier involved in autophagy and the Cvt pathway; conjugated to Atg5p to form a complex involved in Atg8p lipidation; Atg12p-Atg5p also forms a complex with Atg16p that is required for autophagosome formation
317B01	YKL086W	1	0.29689		101.24		93.34		1	43.0297	40.1944	49.81	51.57	51.6	YKL086W	SRX1		Sulfiredoxin, contributes to oxidative stress resistance by reducing cysteine-sulfinic acid groups in the peroxiredoxin Tsa1p, which is formed upon exposure to oxidants; conserved in higher eukaryotes
317C04	YKL105C	1	0.296907		100.94		93.73		1	42.03	38.7924	53.26	56.01	48.87	YKL105C			Putative protein of unknown function
327G11	YIL049W	1	0.296922		102.85		92.57		4.7	56.2886	50.3031	53.67	55.73	25.11	YIL049W	DFG10		Probable polyprenol reductase that catalyzes conversion of polyprenol to dolichol, the precursor for N-glycosylation; involved in filamentous growth; mutations in human ortholog SRD5A3 confer CDG (Congenital Disorders of Glycosylation)
307F12	YOL046C	1	0.296926		95.34		86.36		1	47.9287	44.6022	48.19	50.17	54.36	YOL046C
331G07	YPR068C	1	0.296962		107.13		99.54		1	44.0752	41.0516	57.22	57.73	54.36	YPR068C	HOS1		Class I histone deacetylase (HDAC) family member that deacetylates Smc3p on lysine residues at anaphase onset; has sequence similarity to Hda1p, Rpd3p, Hos2p, and Hos3p; interacts with the Tup1p-Ssn6p corepressor complex
322A01	YGL240W	3	0.296965	0.169247	111.51	35.0896	108.17	36.2021	11.8	39.5548	34.5257	46.23	48.58	36.99	YGL240W	DOC1	APC10	Processivity factor required for the ubiquitination activity of the anaphase promoting complex (APC), mediates the activity of the APC by contributing to substrate recognition; involved in cyclin proteolysis
322H10	YPL019C	1	0.297033		102.46		91.78		1	45.1058	41.6297	54.78	56.86	44.3	YPL019C	VTC3	PHM2	Subunit of the vacuolar transporter chaperone (VTC) complex involved in membrane trafficking, vacuolar polyphosphate accumulation, microautophagy and non-autophagic vacuolar fusion
306A08	YOR027W	1	0.297215		113.06		106.51		1	43.9063	40.1944	46.26	47.63	49.78	YOR027W	STI1		Hsp90 cochaperone, interacts with the Ssa group of the cytosolic Hsp70 chaperones and activates Ssa1p ATPase activity; interacts with Hsp90 chaperones and inhibits their ATPase activity; homolog of mammalian Hop
329A12	YKR073C	1	0.297217		100.4		91.88		1	43.941	40.1944	63.11	51.85	48.87	YKR073C
314D10	YHR103W	1	0.297228		95.41		85.51		1	40.4115	37.4233	49.06	51.53	45.21	YHR103W	SBE22		Protein involved in the transport of cell wall components from the Golgi to the cell surface; similar in structure and functionally redundant with Sbe2p; involved in bud growth
343F11	YOR276W	1	0.29728		105.36		97.13		1	46.6251	43.0989	53.77	57.22	67.11	YOR276W	CAF20	CAF2 CAP20 p20	Phosphoprotein of the mRNA cap-binding complex involved in translational control, repressor of cap-dependent translation initiation, competes with eIF4G for binding to eIF4E
314H02	YHR157W	1	0.297357		93.21		87.63		1	42.6945	39.6296	57.36	55.69	47.94	YHR157W	REC104		Protein involved in early stages of meiotic recombination; required for meiotic crossing over; forms a complex with Rec102p and Spo11p necessary during the initiation of recombination
307G08	YOL053W	1	0.29736		92.38		83.29		1	42.8985	39.6296	45.15	46.92	44.3	YOL053W	AIM39		Putative protein of unknown function; null mutant displays elevated frequency of mitochondrial genome loss
347E03	YER149C	1	0.297388		91		83.97		1	45.5359	42.5071	51	55.69	48.87	YER149C	PEA2	DFG9 PPF2	Coiled-coil polarisome protein required for polarized morphogenesis, cell fusion, and low affinity Ca2+ influx; forms polarisome complex with Bni1p, Bud6p, and Spa2p; localizes to sites of polarized growth
323B10	YPR122W	1	0.297448		100.95		92.26		1	44.997	40.1944	56.04	55.87	54.36	YPR122W	AXL1	FUS5 STE22	Haploid specific endoprotease that performs one of two N-terminal cleavages during maturation of a-factor mating pheromone; required for axial budding pattern of haploid cells
331C01	YMR110C	1	0.297452		91.31		82.44		1	44.5182	41.6297	62.08	52.33	50.69	YMR110C	HFD1		Putative fatty aldehyde dehydrogenase, located in the mitochondrial outer membrane and also in lipid particles; has similarity to human fatty aldehyde dehydrogenase (FALDH) which is implicated in Sjogren-Larsson syndrome
322E06	YPL071C	1	0.297467		94.1		88.23		1	44.4984	41.6297	54.5	48.95	15.07	YPL071C			Putative protein of unknown function; green fluorescent protein (GFP)-fusion protein localizes to both the cytoplasm and the nucleus
341E06	YNL087W	1	0.29755		100.28		92.04		1	43.9055	41.0516	50.01	52.54	47.05	YNL087W	TCB2		Bud-specific protein with a potential role in membrane trafficking; GFP-fusion protein migrates from the cell surface to intracellular vesicles near vacuole; contains 3 calcium and lipid binding domains; mRNA is targeted to the bud
339B04	YNL041C	1	0.297555		95.85		88.11		1	43.6132	40.1944	50.91	53.28	57.09	YNL041C	COG6	COD2 SEC37	Component of the conserved oligomeric Golgi complex (Cog1p through Cog8p), a cytosolic tethering complex that functions in protein trafficking to mediate fusion of transport vesicles to Golgi compartments
320D09	YGR087C	1	0.297556		82.53		75.67		1	44.9599	41.0516	46.8	49.68	23.29	YGR087C	PDC6		Minor isoform of pyruvate decarboxylase, decarboxylates pyruvate to acetaldehyde, involved in amino acid catabolism; transcription is glucose- and ethanol-dependent, and is strongly induced during sulfur limitation
306D06	YOR068C	1	0.297562		97.58		91.02		1	44.3021	41.0516	59.22	54.11	42.47	YOR068C	VAM10	YOR29-19	Protein involved in vacuole morphogenesis; acts at an early step of homotypic vacuole fusion that is required for vacuole tethering
331E04	YPR020W	1	0.297617		108.42		99.68		1	43.8248	40.1944	50.77	53.5	47.94	YPR020W	ATP20		Subunit g of the mitochondrial F1F0 ATP synthase; reversibly phosphorylated on two residues; unphosphorylated form is required for dimerization of the ATP synthase complex
333H05	YMR326C	1	0.297637		106.68		95.81		1	42.4432	39.6296	53.64	55.27	57.08	YMR326C
339F10	YBR007C	1	0.297652		99.17		89.57		1	43.4458	39.6296	45.25	50.61	10.5	YBR007C	DSF2		Deletion suppressor of mpt5 mutation
309C07	YPL112C	1	0.297654		105.15		96.11		1	45.8216	42.5071	47.71	51.5	49.78	YPL112C	PEX25		Peripheral peroxisomal membrane peroxin required for the regulation of peroxisome size and maintenance, recruits GTPase Rho1p to peroxisomes, induced by oleate, interacts with homologous protein Pex27p
316E06	YKL007W	1	0.297708		93.66		88.32		1	45.1922	41.6297	51.63	55.51	55.27	YKL007W	CAP1		Alpha subunit of the capping protein (CP) heterodimer (Cap1p and Cap2p) which binds to the barbed ends of actin filaments preventing further polymerization; localized predominantly to cortical actin patches
346F01	YGL108C	1	0.29772		102.6		94.92		1	43.0819	39.6296	48.61	49.78	48.87	YGL108C			Protein of unknown function, predicted to be palmitoylated; green fluorescent protein (GFP)-fusion protein localizes to the cell periphery
332F01	YJL037W	1	0.297739		104.45		96.27		1	44.1642	41.0516	49.78	50.57	47.05	YJL037W	IRC18		Putative protein of unknown function; expression induced in respiratory-deficient cells and in carbon-limited chemostat cultures; similar to adjacent ORF, YJL038C; null mutant displays increased levels of spontaneous Rad52p foci
310F06	YDR110W	3	0.297739	0.0380228	105.75	5.94834	97.49	4.98867	1	44.6439	41.0516	50.27	53.64	51.6	YDR110W	FOB1	HRM1	Nucleolar protein that binds the rDNA replication fork barrier (RFB) site; required for replication fork blocking, recombinational hotspot activity, condensin recruitment to RFB and rDNA repeat segregation; related to retroviral integrases
317B07	YKL093W	1	0.29777		103.36		94.84		1	42.1444	39.6296	56.43	59.88	58.93	YKL093W	MBR1		Protein involved in mitochondrial functions and stress response; overexpression suppresses growth defects of hap2, hap3, and hap4 mutants
342G10	YCR067C	1	0.297773		95.25		86.87		1	42.3563	39.6296	51.26	53.74	49.78	YCR067C	SED4		Integral endoplasmic reticulum membrane protein that stimulates Sar1p GTPase activity; involved in COPII vesicle budding through disassociation of coat proteins from membranes onto liposomes; binds Sec16p; similar to Sec12p
345D03	YDL023C	1	0.297783		102.73		93.41		1	45.2408	42.5071	39.77	41.25	41.54	YDL023C
342C01	YJL196C	1	0.297834		94.07		86.01		1	43.8017	40.1944	43.04	46.17	44.3	YJL196C	ELO1		Elongase I, medium-chain acyl elongase, catalyzes carboxy-terminal elongation of unsaturated C12-C16 fatty acyl-CoAs to C16-C18 fatty acids
322F11	YPL053C	1	0.297864		96.3		90.84		1	44.8858	41.0516	53.22	56.04	47.05	YPL053C	KTR6	MNN6	Probable mannosylphosphate transferase involved in the synthesis of core oligosaccharides in protein glycosylation pathway; member of the KRE2/MNT1 mannosyltransferase family
336B05	YJL016W	1	0.297908		98.02		88.74		1	47.6545	43.0989	53.95	55.59	51.6	YJL016W		YJL017W	Putative protein of unknown function; GFP-fusion protein localizes to the cytoplasm; conserved in closely related Saccharomyces species
344D09	YKR102W	2	0.297918	0.160973	90.24	5.671	82.15	6.15183	1	42.4915	39.6296	49.29	51.93	47.94	YKR102W	FLO10		Lectin-like protein with similarity to Flo1p, thought to be involved in flocculation
315C06	YCL025C	1	0.297951		84.97		77.67		1	46.5116	43.0989	47.78	51.8	43.4	YCL025C	AGP1	YCC5	Low-affinity amino acid permease with broad substrate range, involved in uptake of asparagine, glutamine, and other amino acids; expression is regulated by the SPS plasma membrane amino acid sensor system (Ssy1p-Ptr3p-Ssy5p)
339E09	YBL095W	1	0.29798		100.36		91.88		1	44.0361	40.1944	49.11	53.09	52.51	YBL095W			Putative protein of unknown function; the authentic, non-tagged protein is detected in highly purified mitochondria in high-throughput studies
332C10	YJL080C	1	0.298022		174.4		174.61		1	84.5544	93.438	73.66	79.64	85.41	YJL080C	SCP160		Essential RNA-binding G protein effector of mating response pathway, mainly associated with nuclear envelope and ER, interacts in mRNA-dependent manner with translating ribosomes via multiple KH domains, similar to vertebrate vigilins
346D09	YDR517W	1	0.298029		100.14		92.29		1	43.8235	41.0516	44.69	47.4	46.11	YDR517W	GRH1		Acetylated, cis-golgi localized protein involved in ER to Golgi transport; homolog of human GRASP65; forms a complex with the coiled-coil protein Bug1p; mutants are compromised for the fusion of ER-derived vesicles with Golgi membranes
336F06	YJR062C	2	0.298042	0.0385311	87.49	1.18794	80.355	1.35057	1	42.5882	39.6296	50.73	52.68	50.7	YJR062C	NTA1	DEA1	Amidase, removes the amide group from N-terminal asparagine and glutamine residues to generate proteins with N-terminal aspartate and glutamate residues that are targets of ubiquitin-mediated degradation
315C10	YCL029C	1	0.298149		128.81		118.61		4.1	49.1071	44.6022	64.89	55.68	26.03	YCL029C	BIK1	PAC14 ARM5	Microtubule-associated protein, component of the interface between microtubules and kinetochore, involved in sister chromatid separation; essential in polyploid cells but not in haploid or diploid cells; ortholog of mammalian CLIP-170
333E04	YLR427W	1	0.29816		95.11		86.08		1	41.9454	38.7924	48.51	51.47	51.6	YLR427W	MAG2		Cytoplasmic protein of unknown function; induced in response to mycotoxin patulin; ubiquitinated protein similar to the human ring finger motif protein RNF10; predicted to be involved in repair of alkylated DNA due to interaction with MAG1
301D09	YAL009W	2	0.298219	0.0489772	97.99	4.41235	90.005	4.97096	1	40.819	38.2408	45.4	48.96	27.86	YAL009W	SPO7		Putative regulatory subunit of Nem1p-Spo7p phosphatase holoenzyme, regulates nuclear growth by controlling phospholipid biosynthesis, required for normal nuclear envelope morphology, premeiotic replication, and sporulation
342G04	YCR033W	1	0.298224		98.49		88.53		1	44.6991	41.0516	47.3	48.87	34.24	YCR033W	SNT1		Subunit of the Set3C deacetylase complex that interacts directly with the Set3C subunit, Sif2p; putative DNA-binding protein; mutant has increased aneuploidy tolerance
333G01	YLR453C	1	0.298236		105.75		95.88		1	42.947	39.6296	56.86	55.94	47.05	YLR453C	RIF2		Protein that binds to the Rap1p C-terminus and acts synergistically with Rif1p to help control telomere length and establish telomeric silencing; deletion results in telomere elongation
340C10	YBR076W	1	0.298379		109.59		100.8		1	43.8126	40.1944	47.52	49.5	34.25	YBR076W	ECM8		Non-essential protein of unknown function
324E03	YBL002W	1	0.298389		94.35		85.31		1	40.5916	36.6176	56.9	60.25	54.36	YBL002W	HTB2		Histone H2B, core histone protein required for chromatin assembly and chromosome function; nearly identical to HTB1; Rad6p-Bre1p-Lge1p mediated ubiquitination regulates transcriptional activation, meiotic DSB formation and H3 methylation
330D03	YLR039C	1	0.29843		95.21		86.15		3	42.2941	38.7924	48.84	51.43	45.21	YLR039C	RIC1		Protein involved in retrograde transport to the cis-Golgi network; forms heterodimer with Rgp1p that acts as a GTP exchange factor for Ypt6p; involved in transcription of rRNA and ribosomal protein genes
327A05	YDR262W	1	0.298476		94.37		85.05		1	46.0868	43.0989	58.45	59.33	47.94	YDR262W			Putative protein of unknown function; green fluorescent protein (GFP)-fusion protein localizes to the vacuole and is induced in response to the DNA-damaging agent MMS; gene expression increases in response to Zymoliase treatment
347D09	YER140W	1	0.298482		101.61		92.03		1	43.8932	40.1944	46.7	49.61	49.78	YER140W			Putative protein of unknown function; the authentic, non-tagged protein is detected in highly purified mitochondria in high-throughput studies; genetic interactions suggest a role in folding of ER membrane proteins
338G01	YDR290W	1	0.298494		103.43		93.95		1	42.7266	39.6296	48.46	51.21	48.87	YDR290W
311B07	YDR370C	1	0.298533		105.27		98.28		1	45.1352	41.6297	49.97	53.6	50.7	YDR370C			Putative protein of unknown function
314F01	YHR123W	1	0.298555		87.99		80.59		1	43.1461	39.6296	48.77	50.63	51.6	YHR123W	EPT1		sn-1,2-diacylglycerol ethanolamine- and cholinephosphotranferase; not essential for viability
303B01	YML062C	1	0.298562		107.16		99.37		1	45.5625	41.6297	50.67	53.4	52.51	YML062C	MFT1	MFT52	Subunit of the THO complex, which is a nuclear complex comprised of Hpr1p, Mft1p, Rlr1p, and Thp2p, that is involved in transcription elongation and mitotic recombination; involved in telomere maintenance
320H09	YLR308W	1	0.298614		96.81		88.57		1	45.3959	42.5071	49.78	50.63	50.7	YLR308W	CDA2		Chitin deacetylase, together with Cda1p involved in the biosynthesis ascospore wall component, chitosan; required for proper rigidity of the ascospore wall
329A01	YIR038C	1	0.298741		100.45		92.29		1	45.797	42.5071	46.7	48.61	49.78	YIR038C	GTT1		ER associated glutathione S-transferase capable of homodimerization; expression induced during the diauxic shift and throughout stationary phase; functional overlap with Gtt2p, Grx1p, and Grx2p
346G03	YGL132W	1	0.298779		101.21		93.03		1	43.0709	39.6296	52.2	54.02	46.11	YGL132W
315D09	YCL046W	1	0.298791		100.83		90.25		1	45.5061	42.5071	49.94	52.17	53.43	YCL046W
348A02	YIL158W	1	0.298794		96.65		90.86		1	46.232	42.5071	40.48	43.79	47.05	YIL158W	AIM20		Putative protein of unknown function; overexpression causes a cell cycle delay or arrest; green fluorescent protein (GFP)-fusion protein localizes to the vacuole; null mutant displays elevated frequency of mitochondrial genome loss
317G07	YKL176C	1	0.298902		95.37		87.39		1	48.7588	45.2132	53.53	57.26	54.36	YKL176C	LST4		Protein possibly involved in a post-Golgi secretory pathway; required for the transport of nitrogen-regulated amino acid permease Gap1p from the Golgi to the cell surface
309H02	YBR220C	1	0.298908		108.71		98.69		1	45.0716	42.5071	49.45	50.53	41.54	YBR220C			Putative protein of unknown function; YBR220C is not an essential gene
308H02	YPL171C	2	0.298947	0.0156014	102.66	10.5642	93.305	10.147	1	46.9931	43.0989	52.44	53.19	47.94	YPL171C	OYE3	ZRG6 Old Yellow Enzyme	Conserved NADPH oxidoreductase containing flavin mononucleotide (FMN), homologous to Oye2p with different ligand binding and catalytic properties; has potential roles in oxidative stress response and programmed cell death
323F08	YPR195C	1	0.299016		98.85		91.64		1	43.6778	39.6296	48.77	49.71	26.93	YPR195C
318E12	YOR216C	1	0.299022		88.19		82.21		1	45.8309	41.6297	49.06	50.93	43.4	YOR216C	RUD3	GRP1	Golgi matrix protein involved in the structural organization of the cis-Golgi; interacts genetically with COG3 and USO1
333B08	YJR127C	1	0.299062		94.79		85.42		1	44.3915	41.0516	57.62	58.63	48.87	YJR127C	RSF2	ZMS1	Zinc-finger protein involved in transcriptional control of both nuclear and mitochondrial genes, many of which specify products required for glycerol-based growth, respiration, and other functions
347G01	YER181C	1	0.299155		104.54		95.3		1	43.7048	40.1944	44.91	47.78	47.05	YER181C
344B03	YPR023C	1	0.299165		104.69		99.08		1	46.7024	43.0989	42.48	45.18	45.21	YPR023C	EAF3		Esa1p-associated factor, nonessential component of the NuA4 acetyltransferase complex, homologous to Drosophila dosage compensation protein MSL3; plays a role in regulating Ty1 transposition
330D12	YMR271C	1	0.299216		93.16		84.24		1	40.5363	37.4233	46.67	47.78	48.87	YMR271C	URA10		Minor orotate phosphoribosyltransferase (OPRTase) isozyme that catalyzes the fifth enzymatic step in the de novo biosynthesis of pyrimidines, converting orotate into orotidine-5'-phosphate; major OPRTase encoded by URA5
321A07	YDR147W	1	0.299248		82.42		74.52		1	44.8034	41.6297	55.13	55.69	51.6	YDR147W	EKI1		Ethanolamine kinase, primarily responsible for phosphatidylethanolamine synthesis via the CDP-ethanolamine pathway; exhibits some choline kinase activity, thus contributing to phosphatidylcholine synthesis via the CDP-choline pathway
308G05	YPL181W	1	0.299285		105.69		96.93		1	47.4537	43.9967	49.84	54.02	42.48	YPL181W	CTI6	RXT1	Protein that relieves transcriptional repression by binding to the Cyc8p-Tup1p corepressor and recruiting the SAGA complex to the repressed promoter; contains a PHD finger domain
342H08	YCL035C	1	0.299308		93.98		84.57		1	45.4397	42.5071	44.78	46.92	40.65	YCL035C	GRX1		Hydroperoxide and superoxide-radical responsive heat-stable glutathione-dependent disulfide oxidoreductase with active site cysteine pair; protects cells from oxidative damage
338D10	YIL007C	1	0.299314		102.63		96.18		1	43.3012	39.6296	45.87	48.46	44.3	YIL007C	NAS2		Proteasome-interacting protein involved in the assembly of the base subcomplex of the 19S proteasomal regulatory particle (RP); similar to mammalian proteasomal modulator subunit; non-essential gene; interacts with Rpn4p
314F11	YHR136C	1	0.29936		95.95		86.95		1	42.1224	38.2408	52.65	54.92	47.94	YHR136C	SPL2		Protein with similarity to cyclin-dependent kinase inhibitors; downregulates low-affinity phosphate transport during phosphate limitation; overproduction suppresses a plc1 null mutation; GFP-fusion protein localizes to the cytoplasm
329B06	YKR080W	1	0.299443		100.02		92.54		1	45.0942	42.5071	57.33	58.09	55.27	YKR080W	MTD1		NAD-dependent 5,10-methylenetetrahydrafolate dehydrogenase, plays a catalytic role in oxidation of cytoplasmic one-carbon units; expression is regulated by Bas1p and Bas2p, repressed by adenine, and may be induced by inositol and choline
309G09	YBR216C	1	0.299473		110.97		101.45		1	45.6727	42.5071	49.19	51.33	48.87	YBR216C	YBP1		Protein required for oxidation of specific cysteine residues of the transcription factor Yap1p, resulting in the nuclear localization of Yap1p in response to stress
317G03	YKL168C	1	0.299484		87.81		81.4		1	44.6752	41.6297	50.93	53.57	50.7	YKL168C	KKQ8		Putative serine/threonine protein kinase with unknown cellular role
334E08	YJR131W	1	0.299485		101.96		96.17		1	42.2465	38.7924	51.2	54.4	50.7	YJR131W	MNS1		Alpha-1,2-mannosidase involved in ER quality control; catalyzes the removal of one mannose residue from Man9GlcNAc to produce a single isomer of Man8GlcNAc in N-linked oligosaccharide biosynthesis; integral to ER membrane
342B05	YJL163C	1	0.29953		100.28		91.01		1	43.8322	39.6296	49.68	51.57	51.6	YJL163C			Putative protein of unknown function
347G12	YMR055C	1	0.299597		108.89		98.25		1	45.2331	41.6297	57.36	57.76	53.43	YMR055C	BUB2	PAC7	Mitotic exit network regulator, forms GTPase-activating Bfa1p-Bub2p complex that binds Tem1p and spindle pole bodies, blocks cell cycle progression before anaphase in response to spindle and kinetochore damage
303H02	YMR036C	1	0.299615		105.47		98		1	50.274	46.765	59.15	64.12	50.7	YMR036C	MIH1		Protein tyrosine phosphatase involved in cell cycle control; regulates the phosphorylation state of Cdc28p; homolog of S. pombe cdc25
322F04	YPL060W	1	0.299651		94.56		88.72		1	44.5206	41.0516	49.48	52.82	51.6	YPL060W	MFM1	LPE10	Mitochondrial inner membrane magnesium transporter, involved in maintenance of mitochondrial magnesium concentrations and membrane potential; indirectly affects splicing of group II introns; functionally and structurally related to Mrs2p
304C10	YMR189W	1	0.299654		92.53		84.88		1	43.6961	40.1944	46.11	48.16	42.48	YMR189W	GCV2	GSD2	P subunit of the mitochondrial glycine decarboxylase complex, required for the catabolism of glycine to 5,10-methylene-THF; expression is regulated by levels of 5,10-methylene-THF in the cytoplasm
310C11	YDR068W	1	0.299713		97.79		91.15		1	43.7339	41.0516	56.76	61.53	61.64	YDR068W	DOS2		Protein of unknown function, green fluorescent protein (GFP)-fusion protein localizes to the cytoplasm
319G07	YLR348C	1	0.299806		93.32		88.8		1	42.6809	40.1944	48.42	50.6	49.78	YLR348C	DIC1		Mitochondrial dicarboxylate carrier, integral membrane protein, catalyzes a dicarboxylate-phosphate exchange across the inner mitochondrial membrane, transports cytoplasmic dicarboxylates into the mitochondrial matrix
306G02	YOR301W	1	0.299826		93.64		86.39		1	46.178	41.6297	47.5	48.42	44.3	YOR301W	RAX1		Protein involved in bud site selection during bipolar budding; localization requires Rax2p; has similarity to members of the insulin-related peptide superfamily
326G04	YKR056W	1	0.299839		101.13		92.19		1	43.4695	40.1944	60.96	65.88	63.47	YKR056W	TRM2	NUD1 RNC1 NUC2	tRNA methyltransferase, 5-methylates the uridine residue at position 54 of tRNAs and may also have a role in tRNA stabilization or maturation; endo-exonuclease with a role in DNA repair
305A03	YMR284W	2	0.299882	0.0200361	108.01	10.2248	101.5	9.67322	1	54.8342	50.965	48.17	49.35	30.59	YMR284W	YKU70	KU70 HDF1 NES24	Subunit of the telomeric Ku complex (Yku70p-Yku80p), involved in telomere length maintenance, structure and telomere position effect; relocates to sites of double-strand cleavage to promote nonhomologous end joining during DSB repair
309F02	YBR187W	1	0.2999		109.56		100.03		1	42.9858	40.1944	61.17	53.53	39.73	YBR187W	GDT1		Putative protein of unknown function; expression is reduced in a gcr1 null mutant; GFP-fusion protein localizes to the vacuole; expression pattern and physical interactions suggest a possible role in ribosome biogenesis
317E12	YKL148C	1	0.299912		100.77		91.57		1	42.3704	38.7924	47.65	49.06	48.87	YKL148C	SDH1	SDHA	Flavoprotein subunit of succinate dehydrogenase (Sdh1p, Sdh2p, Sdh3p, Sdh4p), which couples the oxidation of succinate to the transfer of electrons to ubiquinone as part of the TCA cycle and the mitochondrial respiratory chain
307D08	YOL007C	1	0.299913		99.12		90.76		1	44.2776	40.1944	49.91	51.37	50.7	YOL007C	CSI2		Protein of unknown function; green fluorescent protein (GFP)- fusion protein localizes to the mother side of the bud neck and the vacuole; YOL007C is not an essential gene
312G09	YER087C-A	1	0.299963		98.13		91.42		1	42.539	39.6296	48.42	51.67	55.27	YER087C-A
329H10	YOL137W	1	0.299974		101.5		91.55		1	45.055	41.6297	45.77	48.87	42.48	YOL137W	BSC6		Protein of unknown function containing 8 putative transmembrane seqments; ORF exhibits genomic organization compatible with a translational readthrough-dependent mode of expression
324E10	YBL011W	1	0.3		90.9		82.1		1	43.2309	40.1944	52.61	54.02	48.87	YBL011W	SCT1	GAT2	Glycerol 3-phosphate/dihydroxyacetone phosphate dual substrate-specific sn-1 acyltransferase of the glycerolipid biosynthesis pathway, prefers 16-carbon fatty acids, similar to Gpt2p, gene is constitutively transcribed
313H10	YHR012W	1	0.300013		89.01		81.39		1	45.5504	42.5071	56.26	58.85	58.93	YHR012W	VPS29	VPT6 PEP11	Endosomal protein that is a subunit of the membrane-associated retromer complex essential for endosome-to-Golgi retrograde transport; forms a subcomplex with Vps35p and Vps26p that selects cargo proteins for endosome-to-Golgi retrieval
307C10	YOR382W	2	0.300022	0.0888023	92.405	13.527	83.475	12.4239	1	44.3927	40.1944	48.61	50.3	47.94	YOR382W	FIT2		Mannoprotein that is incorporated into the cell wall via a glycosylphosphatidylinositol (GPI) anchor, involved in the retention of siderophore-iron in the cell wall
327G07	YIL041W	1	0.300027		100.39		89.66		1	44.3113	41.0516	50.67	52.88	44.3	YIL041W	GVP36		BAR domain-containing protein that localizes to both early and late Golgi vesicles; required for adaptation to varying nutrient concentrations, fluid-phase endocytosis, polarization of the actin cytoskeleton, and vacuole biogenesis
307B11	YOR367W	1	0.300077		99.31		88.6		1	43.7725	40.1944	49.45	51.33	46.11	YOR367W	SCP1		Component of yeast cortical actin cytoskeleton, binds and cross links actin filaments; originally identified by its homology to calponin (contains a calponin-like repeat) but the Scp1p domain structure is more similar to transgelin
323G12	YCR105W	1	0.300108		93.81		84.97		1	43.222	40.1944	50.07	51.57	55.27	YCR105W	ADH7	ADHVII	NADPH-dependent medium chain alcohol dehydrogenase with broad substrate specificity; member of the cinnamyl family of alcohol dehydrogenases; may be involved in fusel alcohol synthesis or in aldehyde tolerance
310F05	YDR109C	1	0.300136		95.38		88.32		1	42.1313	38.7924	53.46	57.15	53.43	YDR109C			Putative kinase
317F02	YKL150W	2	0.300141	0.201305	100.015	1.15258	92.625	2.08597	1	43.5488	40.1944	48.54	51.8	53.43	YKL150W	MCR1		Mitochondrial NADH-cytochrome b5 reductase, involved in ergosterol biosynthesis
304C05	YMR182C	1	0.300161		89.69		82.1		1	43.166	39.6296	45.18	47.84	43.4	YMR182C	RGM1		Putative transcriptional repressor with proline-rich zinc fingers; overproduction impairs cell growth
331E05	YPR027C	1	0.300217		108.71		100.29		1	44.7415	41.0516	48.42	51.47	54.36	YPR027C			Putative protein of unknown function
338H05	YOR333C	1	0.300294		104.87		96.7		1	41.1098	38.2408	48.02	50.97	47.95	YOR333C
311A02	YDR344C	1	0.300307		108.1		99.66		1	43.2583	40.1944	48.74	52.04	53.43	YDR344C
347F04	YER170W	1	0.300332		106.15		96.19		1	45.1988	41.6297	49.88	51.97	50.7	YER170W	ADK2	PAK3 AKY3	Mitochondrial adenylate kinase, catalyzes the reversible synthesis of GTP and AMP from GDP and ADP; may serve as a back-up for synthesizing GTP or ADP depending on metabolic conditions; 3' sequence of ADK2 varies with strain background
339G11	YBR023C	1	0.300365		96.88		86.96		1	43.4656	38.7924	43.91	46.93	35.16	YBR023C	CHS3	CSD2 CAL1 DIT101 KTI2	Chitin synthase III, catalyzes the transfer of N-acetylglucosamine (GlcNAc) to chitin; required for synthesis of the majority of cell wall chitin, the chitin ring during bud emergence, and spore wall chitosan
345B05	YBR157C	1	0.300406		104.32		95.43		1	42.9002	38.7924	51.4	52.44	47.05	YBR157C	ICS2		Protein of unknown function; null mutation does not confer any obvious defects in growth, spore germination, viability, or carbohydrate utilization
316H06	YKL063C	1	0.300474		101.11		95.44		1	43.7255	41.0516	56.29	55.9	49.78	YKL063C			Putative protein of unknown function; green fluorescent protein (GFP)-fusion protein localizes to the Golgi
344G09	YBR101C	2	0.300477	0.0527085	102.37	0.240416	94.96	0.0282843	1	46.0626	41.0516	53.91	56.43	46.11	YBR101C	FES1		Hsp70 (Ssa1p) nucleotide exchange factor, cytosolic homolog of Sil1p, which is the nucleotide exchange factor for BiP (Kar2p) in the endoplasmic reticulum
317G09	YKL183W	1	0.300493		82.79		76.15		1	43.8355	40.1944	51.8	54.99	45.21	YKL183W	LOT5		Protein of unknown function; gene expression increases in cultures shifted to a lower temperature
339B07	YNL045W	1	0.30052		103.96		96.39		1	43.1434	40.1944	55.85	58.51	58.91	YNL045W	LAP2		Leucyl aminopeptidase yscIV (leukotriene A4 hydrolase) with epoxide hydrolase activity, metalloenzyme containing one zinc atom; green fluorescent protein (GFP)-fusion protein localizes to the cytoplasm and nucleus
304F12	YMR246W	2	0.300546	0.0316821	93.1	1.03238	85.96	1.03238	1	44.3638	41.0516	47.84	49.71	45.21	YMR246W	FAA4		Long chain fatty acyl-CoA synthetase, activates imported fatty acids with a preference for C12:0-C16:0 chain lengths; functions in long chain fatty acid import; important for survival during stationary phase; localized to lipid particles
309F06	YBR197C	1	0.300563		109.69		98.82		1	44.0362	40.1944	45.8	49.48	53.43	YBR197C			Putative protein of unknown function; green fluorescent protein (GFP)-fusion protein localizes to the cytoplasm and nucleus; YBR197C is not an essential gene
312E07	YER051W	1	0.300564		99.23		93.03		1	43.0241	39.6296	49.45	52.58	46.11	YER051W	JHD1	JHDM1 KDM2	JmjC domain family histone demethylase specific for H3-K36, similar to proteins found in human, mouse, drosophila, X. laevis, C. elegans, and S. pombe
347F08	YER176W	1	0.300566		104.77		95.39		1	45.0583	41.6297	49.03	51.16	52.51	YER176W	ECM32	MTT1 HEL1	DNA dependent ATPase/DNA helicase belonging to the Dna2p- and Nam7p-like family of helicases that is involved in modulating translation termination; interacts with the translation termination factors, localized to polysomes
341H12	YGR106C	1	0.300592		139.54		133.98		1	44.1519	41.6297	61.53	68.48	65.29	YGR106C	VOA1		Endoplasmic reticulum protein that functions, together with other assembly factors, in assembly of the V0 sector of the vacuolar ATPase (V-ATPase); null mutation enhances the V-ATPase deficiency of a vma21 mutant impaired in ER retrieval
343E05	YMR322C	1	0.300631		103.6		95.09		1	42.7235	39.6296	48.19	50.63	47.94	YMR322C	SNO4	HSP34	Possible chaperone and cysteine protease, similar to bacterial Hsp31 and yeast Hsp31p, Hsp32p, and Hsp33p; DJ-1/ThiJ/PfpI superfamily member; predicted involvement in pyridoxine metabolism; induced by mild heat stress and copper deprivation
301G09	YLL020C	2	0.300707	0.0983802	103.295	15.1957	96.49	14.6795	1	46.906	41.6297	48.58	48.8	29.67	YLL020C
328C03	YFL048C	2	0.300733	0.0901964	99.485	2.80721	90.76	2.74357	1	44.6343	41.6297	54.15	56.76	55.27	YFL048C	EMP47		Integral membrane component of endoplasmic reticulum-derived COPII-coated vesicles, which function in ER to Golgi transport
344G08	YBR100W	2	0.300765	0.0472912	101.43	0.622254	95.265	0.869741	1	45.9785	42.5071	50.57	52.99	50.7	YBR100W
315A09	YHR202W	1	0.300804		85.95		78.43		1	42.1336	39.6296	51.8	52.75	50.7	YHR202W			Putative protein of unknown function; green fluorescent protein (GFP)-fusion protein localizes to the vacuole, while HA-tagged protein is found in the soluble fraction, suggesting cytoplasmic localization
318G02	YOR234C	1	0.300821		84.6		77.39		1	39.3193	36.0869	48.32	49.39	51.6	YOR234C	RPL33B	rp47 Yl37 L37B RPL37B L33B	Ribosomal protein L37 of the large (60S) ribosomal subunit, nearly identical to Rpl33Ap and has similarity to rat L35a; rpl33b null mutant exhibits normal growth while rpl33a rpl33b double null mutant is inviable
337D03	YDL190C	1	0.300827		90.83		82.46		1	40.4021	36.6176	49.22	49.61	42.48	YDL190C	UFD2		Ubiquitin chain assembly factor (E4) that cooperates with a ubiquitin-activating enzyme (E1), a ubiquitin-conjugating enzyme (E2), and a ubiquitin protein ligase (E3) to conjugate ubiquitin to substrates; also functions as an E3
347B04	YER101C	1	0.30089		101.47		91.8		1	46.5791	43.0989	49.94	52.04	48.87	YER101C	AST2		Protein that may have a role in targeting of plasma membrane [H+]ATPase (Pma1p) to the plasma membrane, as suggested by analysis of genetic interactions
311C09	YDR388W	1	0.300945		100.67		90.48		7	51.3179	47.3955	49	52.51	16.89	YDR388W	RVS167		Actin-associated protein, interacts with Rvs161p to regulate actin cytoskeleton, endocytosis, and viability following starvation or osmotic stress; homolog of mammalian amphiphysin
346C09	YDR503C	1	0.301037		103.52		95.3		1	42.9588	39.6296	50.11	51.6	47.94	YDR503C	LPP1		Lipid phosphate phosphatase, catalyzes Mg(2+)-independent dephosphorylation of phosphatidic acid (PA), lysophosphatidic acid, and diacylglycerol pyrophosphate; involved in control of the cellular levels of phosphatidylinositol and PA
345E04	YDL048C	1	0.30105		105.68		95.87		1	45.7883	42.5071	52	52.75	49.78	YDL048C	STP4		Protein containing a Kruppel-type zinc-finger domain; has similarity to Stp1p, Stp2p, and Stp3p
325B06	YBL088C	1	0.301064		106.02		100.66		1	48.1685	44.6022	55.46	49.41	40.64	YBL088C	TEL1		Protein kinase primarily involved in telomere length regulation; contributes to cell cycle checkpoint control in response to DNA damage; functionally redundant with Mec1p; homolog of human ataxia telangiectasia (ATM) gene
340C02	YBR067C	1	0.301192		101.53		92.4		1	44.985	41.6297	50.24	52.61	52.51	YBR067C	TIP1		Major cell wall mannoprotein with possible lipase activity; transcription is induced by heat- and cold-shock; member of the Srp1p/Tip1p family of serine-alanine-rich proteins
347G04	YER184C	1	0.301194		105.28		96.07		1	44.1499	41.0516	48.61	51	48.87	YER184C			Putative zinc cluster protein; deletion confers sensitivity to Calcufluor white, and prevents growth on glycerol or lactate as sole carbon source
341B01	YNL129W	1	0.301196		104.7		96.2		1	43.019	40.1944	44.18	46.48	44.3	YNL129W	NRK1		Nicotinamide riboside kinase, catalyzes the phosphorylation of nicotinamide riboside and nicotinic acid riboside in salvage pathways for NAD+ biosynthesis
347E10	YER161C	1	0.301279		100.28		90.06		1	48.8043	44.6022	51.13	54.15	50.7	YER161C	SPT2	EXA1 SIN1	Protein involved in negative regulation of transcription; required for RNA polyadenylation; exhibits regulated interactions with both histones and SWI-SNF components, has similarity to mammalian HMG1 proteins
332H02	YHR180W	1	0.301281		106.14		96.88		1	46.0071	42.5071	53.91	52.68	47.05	YHR180W
341H08	YGR086C	1	0.301365		97.09		90.14		1	45.4456	42.5071	43.55	46.45	47.05	YGR086C	PIL1		Primary component of eisosomes, which are large immobile cell cortex structures associated with endocytosis; null mutants show activation of Pkc1p/Ypk1p stress resistance pathways; detected in phosphorylated state in mitochondria
341C12	YNL052W	1	0.301406		101.97		94.58		1	43.9921	41.0516	51.73	51.1	32.42	YNL052W	COX5A		Subunit Va of cytochrome c oxidase, which is the terminal member of the mitochondrial inner membrane electron transport chain; predominantly expressed during aerobic growth while its isoform Vb (Cox5Bp) is expressed during anaerobic growth
347A04	YGL164C	1	0.301407		103.76		93.71		1	43.1567	40.1944	50.37	50.9	45.21	YGL164C	YRB30		RanGTP-binding protein, inhibits RanGAP1 (Rna1p)-mediated GTP hydrolysis of RanGTP (Gsp1p); shares similarity to proteins in other fungi but not in higher eukaryotes
325F08	YGL089C	1	0.301474		96.08		90.67		1	49.5479	44.6022	48.96	51.4	51.6	YGL089C	MF(ALPHA)2		Mating pheromone alpha-factor, made by alpha cells; interacts with mating type a cells to induce cell cycle arrest and other responses leading to mating; also encoded by MF(ALPHA)1, which is more highly expressed than MF(ALPHA)2
317A09	YKL079W	1	0.301501		104.68		96.73		1	43.8917	41.0516	54.95	57.62	58.93	YKL079W	SMY1		Protein that interacts with Myo2p, proposed to be involved in exocytosis; N-terminal domain is related to the motor domain of kinesins
306F12	YOR297C	1	0.301505		92.69		85.85		1	44.6052	41.0516	38.08	37.11	34.25	YOR297C	TIM18		Component of the mitochondrial TIM22 complex involved in insertion of polytopic proteins into the inner membrane; may mediate assembly or stability of the complex
325D03	YGL031C	1	0.301531		84.5		80.95		1	40.0396	36.6176	57.58	57.29	53.43	YGL031C	RPL24A	YL21 rp29 L24A RPL30A L30A	Ribosomal protein L30 of the large (60S) ribosomal subunit, nearly identical to Rpl24Bp and has similarity to rat L24 ribosomal protein; not essential for translation but may be required for normal translation rate
332B12	YJL099W	1	0.301562		102.89		91.94		1	42.2029	38.2408	56.47	55.73	47.05	YJL099W	CHS6	CSD3	Member of the ChAPs family of proteins (Chs5p-Arf1p-binding proteins: Bch1p, Bch2p, Bud7p, Chs6p), that forms the exomer complex with Chs5p to mediate export of specific cargo proteins, including Chs3p, from the Golgi to the plasma membrane
312H12	YGR138C	1	0.301604		99.49		92.52		1	47.1971	43.0989	53.6	54.43	44.3	YGR138C	TPO2		Polyamine transport protein specific for spermine; localizes to the plasma membrane; transcription of TPO2 is regulated by Haa1p; member of the major facilitator superfamily
303C10	YML029W	1	0.301632		108.46		100.28		1	41.7859	38.7924	45.61	49.52	38.82	YML029W	USA1		Scaffold subunit of the Hrd1p ubiquitin ligase that also promotes ligase oligomerization; involved in ER-associated protein degradation (ERAD); interacts with the U1 snRNP-specific protein, Snp1p
334A06	YNR066C	1	0.301693		96.96		91.69		1	45.3716	41.6297	55.13	57.15	55.27	YNR066C			Putative membrane-localized protein of unknown function
308H04	YPL168W	1	0.301753		107.13		98.49		1	46.4531	42.5071	53.22	53.77	44.3	YPL168W			Putative protein of unknown function; green fluorescent protein (GFP)-fusion protein localizes to the mitochondrion; expression may be cell cycle-regulated
331G08	YPR069C	1	0.301819		104.44		95.84		1	42.2711	39.6296	57.51	58.96	53.43	YPR069C	SPE3		Spermidine synthase, involved in biosynthesis of spermidine and also in biosynthesis of pantothenic acid; spermidine is required for growth of wild-type cells
336C02	YJR004C	1	0.301842		94.21		86.01		1	42.5222	39.6296	52.27	54.81	53.43	YJR004C	SAG1	AG(ALPHA)1	Alpha-agglutinin of alpha-cells, binds to Aga1p during agglutination, N-terminal half is homologous to the immunoglobulin superfamily and contains binding site for a-agglutinin, C-terminal half is highly glycosylated and contains GPI anchor
332C12	YJL077C	1	0.301884		101		91.56		1	51.6762	46.1401	52.51	53.19	49.78	YJL077C	ICS3		Protein of unknown function; may play a role in vacuolar sorting, null mutants are hypersensitive to sortin2
345A08	YBR141C	1	0.301895		105.54		97.49		1	44.8804	41.6297	43.31	45.64	46.11	YBR141C			Putative S-adenosylmethionine-dependent methyltransferase; green fluorescent protein (GFP)-fusion protein localizes to the nucleolus; YBR141C is not an essential gene
345H11	YDR448W	1	0.301931		109.4		102.34		1	49.4291	46.1401	63.51	64.28	55.27	YDR448W	ADA2	SWI8	Transcription coactivator, component of the ADA and SAGA transcriptional adaptor/HAT (histone acetyltransferase) complexes
324D09	YGR242W	1	0.301995		93.39		84.84		1	41.3989	38.2408	49.78	54.15	52.51	YGR242W
332C01	YJL098W	1	0.302021		103.14		92.39		1	43.2	40.1944	60.34	51.47	52.51	YJL098W	SAP185		Protein that forms a complex with the Sit4p protein phosphatase and is required for its function; member of a family of similar proteins including Sap4p, Sap155p, and Sap190p
327E08	YIL001W	1	0.302132		101.74		91.04		1	42.2361	38.7924	50.24	51.8	45.21	YIL001W			Putative protein of unknown function; contains a BTB/POZ domain which generally function in protein interactions; deletion slightly improved competitive fitness in rich media; GFP-tagged protein is localized to the cytoplasm
318F05	YOR223W	1	0.302271		99.18		91.68		1	49.1373	45.2132	47.9	51.1	33.33	YOR223W			Putative protein of unknown function
333F11	YLR450W	1	0.302403		86.36		78.59		1	42.9525	39.6296	51.03	52.75	47.05	YLR450W	HMG2		One of two isozymes of HMG-CoA reductase that convert HMG-CoA to mevalonate, a rate-limiting step in sterol biosynthesis; overproduction induces assembly of peripheral ER membrane arrays and short nuclear-associated membrane stacks
345B02	YBR149W	1	0.302403		106.28		96.83		1	43.4102	39.6296	49.48	51.47	47.94	YBR149W	ARA1		NADP+ dependent arabinose dehydrogenase, involved in carbohydrate metabolism; purified as homodimer; naturally occurs with a N-terminus degradation product
330A09	YER096W	1	0.302462		102.78		93.47		1	44.3757	41.0516	55.9	54.54	47.94	YER096W	SHC1		Sporulation-specific activator of Chs3p (chitin synthase III), required for the synthesis of the chitosan layer of ascospores; has similarity to Skt5p, which activates Chs3p during vegetative growth; transcriptionally induced at alkaline pH
332B06	YJL110C	1	0.302467		107.83		97.75		1	45.1461	41.0516	55.02	56.83	47.94	YJL110C	GZF3	DEH1 NIL2	GATA zinc finger protein and Dal80p homolog that negatively regulates nitrogen catabolic gene expression by competing with Gat1p for GATA site binding; function requires a repressive carbon source; dimerizes with Dal80p and binds to Tor1p
323A12	YPR005C	1	0.302475		102.27		94.24		1	43.2941	40.1944	48.35	50.34	20.54	YPR005C	HAL1		Cytoplasmic protein involved in halotolerance; decreases intracellular Na+ (via Ena1p) and increases intracellular K+ by decreasing efflux; expression repressed by Ssn6p-Tup1p and Sko1p and induced by NaCl, KCl, and sorbitol through Gcn4p
314C04	YHR073W	1	0.302481		98.15		89.64		1	43.073	39.6296	49.42	53.6	48.87	YHR073W	OSH3		Member of an oxysterol-binding protein family with seven members in S. cerevisiae; family members have overlapping, redundant functions in sterol metabolism and collectively perform a function essential for viability
303B07	YML056C	1	0.302517		112.04		104.54		1	43.3907	40.1944	45.03	48.93	40.65	YML056C	IMD4		Inosine monophosphate dehydrogenase, catalyzes the first step of GMP biosynthesis, member of a four-gene family in S. cerevisiae, constitutively expressed
328D06	YFR010W	1	0.302588		100.24		90.6		1	50.4731	46.765	46.67	51.87	54.36	YFR010W	UBP6		Ubiquitin-specific protease situated in the base subcomplex of the 26S proteasome, releases free ubiquitin from branched polyubiquitin chains; works in opposition to Hul5p polyubiquitin elongation activity; mutant has aneuploidy tolerance
343E07	YNL140C	1	0.302619		102.91		94.88		1	43.5412	40.1944	51.87	54.05	49.78	YNL140C
301E09	YAR023C	2	0.302638	0.0985711	108.09	19.6859	101.28	16.9281	1	41.9462	38.7924	54.22	58.2	47.05	YAR023C			Putative integral membrane protein, member of DUP240 gene family
339G09	YBR020W	1	0.302657		99.19		90.1		1	45.9198	42.5071	43.42	47.08	53.43	YBR020W	GAL1		Galactokinase, phosphorylates alpha-D-galactose to alpha-D-galactose-1-phosphate in the first step of galactose catabolism; expression regulated by Gal4p
317H06	YOR100C	1	0.302691		82.8		76.15		1	43.9624	41.0516	48.71	49.52	27.86	YOR100C	CRC1		Mitochondrial inner membrane carnitine transporter, required for carnitine-dependent transport of acetyl-CoA from peroxisomes to mitochondria during fatty acid beta-oxidation
315D05	YCL040W	1	0.302728		104.13		91.79		1	45.2695	41.6297	44.06	47.33	47.94	YCL040W	GLK1	HOR3	Glucokinase, catalyzes the phosphorylation of glucose at C6 in the first irreversible step of glucose metabolism; one of three glucose phosphorylating enzymes; expression regulated by non-fermentable carbon sources
327H12	YIL086C	1	0.30278		100.24		90.47		1	42.5048	36.6176	58.34	58.23	54.36	YIL086C
320B01	YLR389C	1	0.302797		87.81		80.37		1	43.9656	41.0516	48.19	50.44	48.87	YLR389C	STE23		Metalloprotease involved, with homolog Axl1p, in N-terminal processing of pro-a-factor to the mature form; expressed in both haploids and diploids; member of the insulin-degrading enzyme family
311G08	YEL020C	1	0.302848		98.21		90.06		1	42.8222	40.1944	48.13	51.9	53.43	YEL020C			Hypothetical protein with low sequence identity to Pdc1p
310E09	YDR099W	1	0.302852		94.96		88.69		1	43.542	41.0516	47.62	51.16	50.7	YDR099W	BMH2	SCD3	14-3-3 protein, minor isoform; controls proteome at post-transcriptional level, binds proteins and DNA, involved in regulation of many processes including exocytosis, vesicle transport, Ras/MAPK signaling, and rapamycin-sensitive signaling
324G01	YBL037W	1	0.302954		88.22		79.54		1	45.3012	42.5071	50.4	52.65	52.51	YBL037W	APL3		Alpha-adaptin, large subunit of the clathrin associated protein complex (AP-2); involved in vesicle mediated transport
337A10	YDL155W	1	0.302994		101.27		93.45		1	43.3705	40.1944	74.42	59.1	51.61	YDL155W	CLB3		B-type cyclin involved in cell cycle progression; activates Cdc28p to promote the G2/M transition; may be involved in DNA replication and spindle assembly; accumulates during S phase and G2, then targeted for ubiquitin-mediated degradation
304B09	YMR173W-A	1	0.303034		104.16		94.76		1	43.4854	39.6296	44.6	46.99	37.91	YMR173W-A
342E09	YBR125C	1	0.303066		100.89		90.71		1	42.433	39.6296	48.51	51.53	50.7	YBR125C	PTC4	GCT1	Cytoplasmic type 2C protein phosphatase (PP2C); identified as a high-copy number suppressor of cnb1 mpk1 synthetic lethality; overexpression decreases high-osmolarity induced Hog1p phosphorylation and kinase activity
338F07	YIL092W	1	0.303112		105.37		98.16		1	42.2959	38.7924	41.32	43.86	47.04	YIL092W			Putative protein of unknown function; green fluorescent protein (GFP)-fusion protein localizes to the cytoplasm and to the nucleus
304A07	YMR155W	1	0.303132		106.39		97.49		1	45.1256	41.6297	48.48	50.73	49.78	YMR155W			Putative protein of unknown function; identified as interacting with Hsp82p in a high-throughput two-hybrid screen
312H05	YGR130C	1	0.303139		95.55		88.36		1	45.2286	41.6297	48.48	49.75	45.21	YGR130C			Component of the eisosome with unknown function; GFP-fusion protein localizes to the cytoplasm; specifically phosphorylated in vitro by mammalian diphosphoinositol pentakisphosphate (IP7)
323H05	YDR525W-A	1	0.303143		92.53		83.01		1	42.2723	39.6296	47.71	50.37	51.6	YDR525W-A	SNA2		Protein of unknown function, has similarity to Pmp3p, which is involved in cation transport; green fluorescent protein (GFP)-fusion protein localizes to the cytoplasm in a punctate pattern
318H07	YOR258W	1	0.303144		181.54		174.35		1	72.3245	70.6888	84	77.24	57.09	YOR258W	HNT3		DNA 5' AMP hydrolase involved in DNA repair; member of the histidine triad (HIT) superfamily of nucleotide-binding proteins; homolog of Aprataxin, a Hint related protein that is mutated in individuals with ataxia with oculomotor apraxia
347C04	YER118C	1	0.303159		100.47		90.52		1	44.7137	41.6297	49.81	52.27	48.87	YER118C	SHO1	SSU81	Transmembrane osmosensor involved in activation of the Cdc42p- and MAP kinase-dependent filamentous growth pathway and the high-osmolarity glycerol response pathway; phosphorylated by Hog1p; interacts with Pbs2p, Msb2p, Hkr1p, and Ste11p
346E06	YDR530C	3	0.303187	0.117552	98.68	6.29605	91.8633	6.78146	1	43.646	40.1944	47.43	49.03	47.94	YDR530C	APA2		Diadenosine 5',5''-P1,P4-tetraphosphate phosphorylase II (AP4A phosphorylase), involved in catabolism of bis(5'-nucleosidyl) tetraphosphates; has similarity to Apa1p
324F08	YBL029W	1	0.303195		90.75		81.78		1	43.128	40.1944	58.45	61.11	51.6	YBL029W			Non-essential protein of unknown function
301D08	YGR121C	2	0.303196	0.020142	102.35	6.50538	95.53	5.99627	1	46.7779	42.5071	52.34	55.9	27.86	YGR121C	MEP1	AMT1	Ammonium permease; belongs to a ubiquitous family of cytoplasmic membrane proteins that transport only ammonium (NH4+); expression is under the nitrogen catabolite repression regulation
331G04	YPR063C	1	0.303265		105.88		97.07		1	45.2866	41.6297	61.38	61.87	54.36	YPR063C			ER-localized protein of unknown function
330A02	YEL011W	1	0.30327		105.71		98.25		1	44.876	41.6297	54.67	54.22	40.65	YEL011W	GLC3	GHA1	Glycogen branching enzyme, involved in glycogen accumulation; green fluorescent protein (GFP)-fusion protein localizes to the cytoplasm in a punctate pattern
329H09	YOL136C	1	0.303314		95.97		85.93		1	44.4412	41.0516	49.55	50.77	42.48	YOL136C	PFK27	PFK-2	6-phosphofructo-2-kinase, catalyzes synthesis of fructose-2,6-bisphosphate; inhibited by phosphoenolpyruvate and sn-glycerol 3-phosphate, expression induced by glucose and sucrose, transcriptional regulation involves protein kinase A
319G12	YLR354C	1	0.303324		92.06		85.94		1	42.5698	40.1944	48.64	49.71	45.21	YLR354C	TAL1		Transaldolase, enzyme in the non-oxidative pentose phosphate pathway; converts sedoheptulose 7-phosphate and glyceraldehyde 3-phosphate to erythrose 4-phosphate and fructose 6-phosphate
330E08	YMR316C-B	1	0.303336		97.65		88.71		1	41.8271	38.7924	48.9	50.97	50.7	YMR316C-B
313G02	YHL023C	1	0.303375		86.06		78.89		1	42.0714	38.7924	63.2	51.74	28.77	YHL023C	NPR3	RMD11	Subunit of the conserved Npr2/3 complex that mediates downregulation of TORC1 activity upon amino acid limitation; subunit of SEA (Seh1-associated) complex; null mutant displays delayed meiotic DNA replication and double-strand break repair
324F01	YBL015W	1	0.303425		93.51		83.93		1	43.9484	41.0516	51.67	52.07	47.94	YBL015W	ACH1		Protein with CoA transferase activity, particularly for CoASH transfer from succinyl-CoA to acetate; has minor acetyl-CoA-hydrolase activity; phosphorylated; required for acetate utilization and for diploid pseudohyphal growth
316G09	YKL051W	1	0.303491		91.39		85.53		1	42.7904	39.6296	51.16	54.36	51.6	YKL051W	SFK1		Plasma membrane protein that may act together with or upstream of Stt4p to generate normal levels of the essential phospholipid PI4P, at least partially mediates proper localization of Stt4p to the plasma membrane
341C06	YDL194W	1	0.303496		110.59		101.2		1	43.1078	39.6296	54.78	56.54	55.27	YDL194W	SNF3		Plasma membrane low glucose sensor that regulates glucose transport; contains 12 predicted transmembrane segments and a long C-terminal tail required for induction of hexose transporters; also senses fructose and mannose; similar to Rgt2p
308G02	YPL185W	1	0.303499		97.91		89.08		1	46.5476	42.5071	47.02	51.77	49.78	YPL185W
342C11	YKL220C	1	0.303523		105.01		95.68		1	44.5363	40.1944	48.61	51.2	36.99	YKL220C	FRE2		Ferric reductase and cupric reductase, reduces siderophore-bound iron and oxidized copper prior to uptake by transporters; expression induced by low iron levels but not by low copper levels
313A09	YGR151C	1	0.303551		85.16		78.25		1	42.13	38.7924	72.79	61.93	37.9	YGR151C
336D06	YJR026W	3	0.303564	0.0106587	87.92	1.66334	80.98	1.9258	1	43.5236	41.0516	50.9	53.84	48.87	YJR026W			Retrotransposon TYA Gag gene co-transcribed with TYB Pol; translated as TYA or TYA-TYB polyprotein; Gag is a nucleocapsid protein that is the structural constituent of virus-like particles (VLPs); similar to retroviral Gag
331A01	YML116W	1	0.303565		90.73		81.58		1	41.4885	38.7924	52.34	52.14	44.3	YML116W	ATR1	SNQ1	Multidrug efflux pump of the major facilitator superfamily, required for resistance to aminotriazole and 4-nitroquinoline-N-oxide
346B06	YDR476C	1	0.303576		102.1		94.12		1	44.2133	40.1944	59.29	60.44	56.19	YDR476C			Putative protein of unknown function; green fluorescent protein (GFP)-fusion protein localizes to the endoplasmic reticulum; YDR476C is not an essential gene
324C04	YGR223C	1	0.3036		93.87		85.08		1	44.0037	41.0516	55.8	58.78	56.19	YGR223C	HSV2		Phosphatidylinositol 3,5-bisphosphate-binding protein, plays a role in micronucleophagy; predicted to fold as a seven-bladed beta-propeller; displays punctate cytoplasmic localization
327E06	YDR335W	1	0.303608		119.88		109.38		1	56.3721	52.645	75.9	80.45	67.11	YDR335W	MSN5	KAP142 STE21	Karyopherin involved in nuclear import and export of proteins, including import of replication protein A and export of Swi6p, Far1p, and Pho4p; required for re-export of mature tRNAs after their retrograde import from the cytoplasm
306B12	YOR043W	1	0.303612		99.72		94.94		1	49.7546	45.2132	34.34	34.85	17.81	YOR043W	WHI2		Protein required, with binding partner Psr1p, for full activation of the general stress response, possibly through Msn2p dephosphorylation; regulates growth during the diauxic shift; negative regulator of G1 cyclin expression
308F03	YPL201C	1	0.303624		99.42		91.13		1	46.0661	42.5071	50.83	53.98	50.7	YPL201C	YIG1		Protein that interacts with glycerol 3-phosphatase and plays a role in anaerobic glycerol production; localizes to the nucleus and cytosol
347C10	YER123W	1	0.303661		101.96		91.44		1	49.8574	46.1401	55.16	57.11	55.27	YER123W	YCK3	CKI3	Palmitoylated, vacuolar membrane-localized casein kinase I isoform; negatively regulates vacuole fusion during hypertonic stress via phosphorylation of Vps41p; shares essential functions with Hrr25p; regulates vesicle fusion in AP-3 pathway
301G01	YLL010C	1	0.30372		108.42		102.38		1	45.7496	42.5071	47.74	47.49	34.24	YLL010C	PSR1		Plasma membrane associated protein phosphatase involved in the general stress response; required along with binding partner Whi2p for full activation of STRE-mediated gene expression, possibly through dephosphorylation of Msn2p
331C09	YMR121C	1	0.303865		106.18		98.34		1	51.3345	48.3519	54.57	56.33	44.3	YMR121C	RPL15B	rp15R YL10 L15B L13B	Protein component of the large (60S) ribosomal subunit, nearly identical to Rpl15Ap and has similarity to rat L15 ribosomal protein; binds to 5.8 S rRNA
302B05	YLR001C	2	0.303879	0.105671	113.925	3.24562	108.435	0.26163	1	41.3716	38.2408	52.82	55.48	53.43	YLR001C			Putative protein of unknown function; the authentic, non-tagged protein is detected in highly purified mitochondria in high-throughput studies; predicted to be palmitoylated
305H09	YOR015W	1	0.303888		102.33		94.12		1	46.3873	41.6297	45.32	46.58	47.04	YOR015W
337E03	YGR044C	1	0.303904		92.69		82.46		1	45.6889	43.0989	56.76	57.62	55.27	YGR044C	RME1	CSP1	Zinc finger protein involved in control of meiosis; prevents meiosis by repressing IME1 expression and promotes mitosis by activating CLN2 expression; directly repressed by a1-alpha2 regulator; mediates cell type control of sporulation
331F07	YPR051W	1	0.303987		111.58		103.67		1	45.3719	42.5071	53.46	55.02	49.78	YPR051W	MAK3	NAA30	Catalytic subunit of N-terminal acetyltransferase of the NatC type; required for replication of dsRNA virus
313F09	YHL030W	1	0.303987		87.78		81.36		1	41.7845	38.7924	49.68	52.48	52.51	YHL030W	ECM29		Scaffold protein that assists in association of the proteasome core particle with the regulatory particle; degraded by the mature proteasome after assembly; contains HEAT-like repeats
308G07	YPL180W	1	0.304061		125.41		116.63		1	56.8839	53.3272	54.6	56.48	43.38	YPL180W	TCO89		Subunit of TORC1 (Tor1p or Tor2p-Kog1p-Lst8p-Tco89p), a complex that regulates growth in response to nutrient availability; cooperates with Ssd1p in the maintenance of cellular integrity; deletion strains are hypersensitive to rapamycin
315C01	YCL012W	1	0.304138		100.06		88.6		1	44.7791	41.6297	45.95	48.96	50.7	YCL012W
317G01	YKL166C	1	0.304147		83.46		76.72		1	40.537	37.4233	50.57	52.65	54.36	YKL166C	TPK3		cAMP-dependent protein kinase catalytic subunit; promotes vegetative growth in response to nutrients via the Ras-cAMP signaling pathway; partially redundant with Tpk1p and Tpk2p; localizes to P-bodies during stationary phase
324B01	YFR041C	1	0.304314		95.47		86.62		1	44.6	41.0516	54.47	55.44	47.05	YFR041C	ERJ5		Type I membrane protein with a J domain is required to preserve the folding capacity of the endoplasmic reticulum; loss of the non-essential ERJ5 gene leads to a constitutively induced unfolded protein response
325G01	YNL236W	1	0.30444		86.06		78.63		1	42.5758	38.2408	58.12	58.16	36.06	YNL236W	SIN4	SDI3 SSF5 SSN4 TSF3 GAL22 BEL2 RYE1 MED16	Subunit of the RNA polymerase II mediator complex; associates with core polymerase subunits to form the RNA polymerase II holoenzyme; contributes to both postive and negative transcriptional regulation; dispensible for basal transcription
313B11	YGR168C	1	0.30446		92.17		85.55		1	43.073	40.1944	51.87	54.85	54.36	YGR168C			Putative protein of unknown function; YGR168C is not an essential gene
335D05	YDR028C	1	0.304483		86.59		79.3		6.3	43.4454	39.6296	47.46	48.22	40.65	YDR028C	REG1	PZF240 SPP43 SRN1 HEX2	Regulatory subunit of type 1 protein phosphatase Glc7p, involved in negative regulation of glucose-repressible genes
308A11	YOL084W	1	0.304503		101.34		93.61		1	43.6021	40.1944	48.77	51	53.43	YOL084W	PHM7		Protein of unknown function, expression is regulated by phosphate levels; green fluorescent protein (GFP)-fusion protein localizes to the cell periphery and vacuole
310F02	YDR105C	1	0.304551		98.95		93.21		1	44.9997	42.5071	65.38	56.94	52.51	YDR105C	TMS1		Vacuolar membrane protein of unknown function that is conserved in mammals; predicted to contain eleven transmembrane helices; interacts with Pdr5p, a protein involved in multidrug resistance
326C10	YKL208W	1	0.304556		101.49		94.53		1	44.529	41.6297	41.83	42.65	23.29	YKL208W	CBT1	SOC1	Protein involved in 5' end processing of mitochondrial COB, 15S_rRNA, and RPM1 transcripts; may also have a role in 3' end processing of the COB pre-mRNA; displays genetic interaction with cell cycle-regulated kinase Dbf2p
331H05	YPR079W	1	0.30465		105.09		96.6		1	46.4039	43.0989	58.31	49.53	42.47	YPR079W	MRL1		Membrane protein with similarity to mammalian mannose-6-phosphate receptors, possibly functions as a sorting receptor in the delivery of vacuolar hydrolases
305H03	YOR009W	1	0.304721		99.13		90.89		1	43.7032	39.6296	46.44	46.87	43.38	YOR009W	TIR4		Cell wall mannoprotein of the Srp1p/Tip1p family of serine-alanine-rich proteins; expressed under anaerobic conditions and required for anaerobic growth; transcription is also induced by cold shock
331G03	YPR062W	1	0.304758		107.04		98.1		1	45.1242	41.6297	52	53.64	52.51	YPR062W	FCY1	yCD	Cytosine deaminase, zinc metalloenzyme that catalyzes the hydrolytic deamination of cytosine to uracil; of biomedical interest because it also catalyzes the deamination of 5-fluorocytosine (5FC) to form anticancer drug 5-fluorouracil (5FU)
329F09	YOL105C	1	0.304794		98.66		89.7		1	44.4049	41.0516	53.57	57.33	47.05	YOL105C	WSC3		Partially redundant sensor-transducer of the stress-activated PKC1-MPK1 signaling pathway involved in maintenance of cell wall integrity; involved in the response to heat shock and other stressors; regulates 1,3-beta-glucan synthesis
323E01	YPR158W	1	0.304845		101.65		94.5		1	45.057	41.6297	51.06	52.37	50.7	YPR158W	CUR1		Protein of unknown function involved in destabilization of [URE3] prions; similar in sequence to Btn2p
303E06	YML004C	1	0.304846		105.65		98.02		1	43.1451	40.1944	46.08	48.9	47.05	YML004C	GLO1		Monomeric glyoxalase I, catalyzes the detoxification of methylglyoxal (a by-product of glycolysis) via condensation with glutathione to produce S-D-lactoylglutathione; expression regulated by methylglyoxal levels and osmotic stress
325H10	YNL202W	1	0.3049		100.69		91.37		1	43.7767	40.1944	47.02	49.29	47.94	YNL202W	SPS19	SPX19 2,4-dienoyl-CoA reductase	Peroxisomal 2,4-dienoyl-CoA reductase, auxiliary enzyme of fatty acid beta-oxidation; homodimeric enzyme required for growth and sporulation on petroselineate medium; expression induced during late sporulation and in the presence of oleate
338G06	YGL235W	1	0.304907		105.55		97.91		1	45.6686	41.6297	49.66	53.62	52.51	YGL235W			Putative protein of unknown function; potential Cdc28p substrate; null mutant displays increased resistance to antifungal agents gliotoxin, cycloheximide and H2O2
301G06	YLL016W	2	0.304941	0.0340092	105.11	15.1321	98.595	13.7957	1	43.7201	41.0516	30.56	30.54	14.15	YLL016W	SDC25		Non-essential Ras guanine nucleotide exchange factor (GEF) localized to the membrane; expressed in poor nutrients and on non-fermentable carbon sources; homologous to CDC25; contains a stop codon in S288C; full-length gene includes YLL017W
304D06	YMR199W	1	0.304999		96.29		88.62		1	46.7556	43.0989	54.57	60.63	26.03	YMR199W	CLN1		G1 cyclin involved in regulation of the cell cycle; activates Cdc28p kinase to promote the G1 to S phase transition; late G1 specific expression depends on transcription factor complexes, MBF (Swi6p-Mbp1p) and SBF (Swi6p-Swi4p)
301G04	YLL014W	2	0.305011	0.0489815	102.575	14.8422	95.615	13.3572	1	43.8147	40.1944	52.51	55.34	39.74	YLL014W	EMC6		Member of a transmembrane complex required for efficient folding of proteins in the ER; null mutant displays induction of the unfolded protein response
340E03	YIL120W	1	0.305076		106.01		98.04		1	44.0344	39.6296	49.65	51.57	51.6	YIL120W	QDR1		Multidrug transporter of the major facilitator superfamily, required for resistance to quinidine, ketoconazole, fluconazole, and barban
347C01	YER115C	2	0.305096	0.000598994	100.25	0.480833	90.83	1.4425	1	46.7325	43.0989	47.68	50.37	43.4	YER115C	SPR6		Protein of unknown function, expressed during sporulation; not required for sporulation, but gene exhibits genetic interactions with other genes required for sporulation
312G07	YER084W	1	0.305136		99.58		93.48		1	43.2909	40.1944	48.06	52.1	53.43	YER084W
327F11	YIL028W	1	0.305192		99.08		89.11		1	43.5125	39.6296	50.9	52.44	47.05	YIL028W
323H11	YDR541C	1	0.305292		95.37		87.37		1	43.2962	40.1944	56.72	56.29	52.51	YDR541C			Putative dihydrokaempferol 4-reductase
301H06	YLL032C	2	0.305336	0.0172664	105.365	9.53887	98.85	9.10754	1	42.2661	38.7924	51	51.47	43.4	YLL032C			Protein of unknown function that may interact with ribosomes, based on co-purification experiments; green fluorescent protein (GFP)-fusion protein localizes to the cytoplasm; YLL032C is not an essential gene
326E10	YKR026C	1	0.305353		101.23		94.62		1	43.6019	40.1944	46.3	48.9	53.43	YKR026C	GCN3	AAS2	Alpha subunit of the translation initiation factor eIF2B, the guanine-nucleotide exchange factor for eIF2; activity subsequently regulated by phosphorylated eIF2; first identified as a positive regulator of GCN4 expression
342A03	YGR238C	1	0.305385		102.1		93.11		1	42.8577	39.6296	42.1	44.09	46.11	YGR238C	KEL2		Protein that functions in a complex with Kel1p to negatively regulate mitotic exit, interacts with Tem1p and Lte1p; localizes to regions of polarized growth; potential Cdc28p substrate
340E09	YIL130W	1	0.305392		104.53		96.42		1	45.7345	41.0516	47.36	49.71	49.78	YIL130W	ASG1		Zinc cluster protein proposed to function as a transcriptional regulator involved in the stress response; null mutants have a respiratory deficiency, calcofluor white sensitivity and slightly increased cycloheximide resistance
328D07	YFR012W	1	0.3054		96.48		86.89		1	42.8037	39.6296	53.26	55.55	52.51	YFR012W			Putative protein of unknown function
323C04	YPR129W	1	0.305468		96.81		88.44		1	44.122	40.1944	47.43	49.19	27.86	YPR129W	SCD6	LSM13	Protein containing an Lsm domain; negatively regulates translation initiation via 48S preinitiation complex assembly; may bind RNA and have a role in RNA processing; overproduction suppresses null mutation in clathrin heavy chain gene CHC1
303D12	YML010W-A	1	0.305472		116.51		110.11		1	47.1137	43.0989	52.75	58.71	58.93	YML010W-A
324H02	YBL054W	1	0.305479		92.63		83.2		1	45.4165	42.5071	51.9	53.36	39.71	YBL054W	TOD6	PBF1	PAC motif binding protein involved in rRNA and ribosome biogenesis; subunit of the RPD3L histone deacetylase complex; Myb-like HTH transcription factor, similar to Dot6p; hypophosphorylated by rapamycin treatment in a Sch9p-dependent manne
339F06	YBL107C	1	0.305484		100.56		91.57		1	43.2358	38.7924	42.58	46.31	23.29	YBL107C			Putative protein of unknown function; green fluorescent protein (GFP)-fusion protein localizes to the cytoplasm; YBL107C is not an essential gene
337C03	YDL178W	1	0.305514		98.29		88.96		1	42.7782	40.1944	52.37	52.61	48.87	YDL178W	DLD2	AIP2	D-lactate dehydrogenase, located in the mitochondrial matrix
339F11	YBR008C	1	0.305541		98.89		89.43		1	43.4615	39.6296	41.37	46.45	9.592	YBR008C	FLR1		Plasma membrane multidrug transporter of the major facilitator superfamily, involved in efflux of fluconazole, diazaborine, benomyl, methotrexate, and other drugs; expression induced in cells treated with the mycotoxin patulin
335H04	YCR043C	1	0.305545		98.25		91.35		1	45.8682	41.6297	53.05	54.4	52.51	YCR043C			Putative protein of unknown function; green fluorescent protein (GFP)-fusion protein localizes to the Golgi apparatus; YCR043C is not an essential gene
301C08	YAL026C	2	0.305651	0.00469869	118.06	4.17193	111.795	2.79307	1	40.7863	37.4233	44.63	47.3	26.03	YAL026C	DRS2	SWA3 FUN38	Aminophospholipid translocase (flippase) that maintains membrane lipid asymmetry in post-Golgi secretory vesicles; contributes to clathrin-coated vesicle formation and endocytosis; mutations in human homolog ATP8B1 result in liver disease
329E11	YOL091W	1	0.305653		92.24		83.43		1	44.4979	41.0516	46.51	49.61	57.98	YOL091W	SPO21	MPC70	Component of the meiotic outer plaque of the spindle pole body, involved in modifying the meiotic outer plaque that is required prior to prospore membrane formation
330E03	YMR311C	1	0.305682		99.1		90.85		1	48.3586	45.2132	53.16	56.01	32.42	YMR311C	GLC8		Regulatory subunit of protein phosphatase 1 (Glc7p), involved in glycogen metabolism and chromosome segregation; proposed to regulate Glc7p activity via conformational alteration; ortholog of the mammalian protein phosphatase inhibitor 2
330B04	YHR016C	1	0.305688		101.51		92.65		1	44.5809	41.0516	47.81	49.55	52.51	YHR016C	YSC84	LSB4	Actin-binding protein involved in bundling of actin filaments and endocytosis of actin cortical patches; activity stimulated by Las17p; contains SH3 domain similar to Rvs167p
302C10	YLR025W	2	0.305696	0.0827559	110.245	8.61963	105.7	6.36396	1	45.107	41.6297	43.82	48.48	54.33	YLR025W	SNF7	VPS32 RNS4 VPL5 DID1	One of four subunits of the endosomal sorting complex required for transport III (ESCRT-III); involved in the sorting of transmembrane proteins into the multivesicular body (MVB) pathway; recruited from the cytoplasm to endosomal membranes
311F08	YEL006W	1	0.305717		98.66		90.9		1	44.4268	40.1944	49.99	50.88	38.81	YEL006W	YEA6	NDT2	Putative mitochondrial NAD+ transporter, member of the mitochondrial carrier subfamily (see also YIA6); has putative human ortholog
308A12	YOL085C	1	0.305719		102.82		94.52		1	43.6972	41.0516	46.73	48.87	47.05	YOL085C
328F10	YGR284C	1	0.305739		93.34		85.42		1	45.0871	41.6297	53.98	55.59	50.7	YGR284C	ERV29		Protein localized to COPII-coated vesicles, involved in vesicle formation and incorporation of specific secretory cargo
303A08	YML081W	2	0.305758	0.0082549	98.865	16.5109	91.625	15.4361	1	40.7959	36.6176	47.65	50.17	57.98	YML081W			Putative protein of unknown function; green fluorescent protein (GFP)-fusion protein localizes to the nucleus; YML081w is not an essential gene
336E08	YJR051W	1	0.305771		99.44		90.01		1	44.5335	41.0516	52.13	52.85	49.78	YJR051W	OSM1	FRDS2	Fumarate reductase, catalyzes the reduction of fumarate to succinate, required for the reoxidation of intracellular NADH under anaerobic conditions; mutations cause osmotic sensitivity
326G10	YKR064W	1	0.305847		99.66		89.88		1	43.2323	40.1944	55.54	56.29	27.86	YKR064W	OAF3		Zinc cluster protein; regulates transcription in response to oleate levels; the authentic, non-tagged protein is detected in highly purified mitochondria in high-throughput studies
343G02	YFL013W-A	1	0.305854		99.06		90.23		1	48.4929	42.5071	50.83	53.29	46.11	YFL013W-A
326H07	YDR252W	1	0.305872		98.62		89.2		1	46.1501	43.0989	61.34	65.06	53.43	YDR252W	BTT1		Beta3 subunit of the heterotrimeric nascent polypeptide-associated complex which binds ribosomes via its beta-subunits in close proximity to nascent polypeptides; interacts with Caf130p of the CCR4-NOT complex; similar to human BTF3
342G07	YCR053W	1	0.305892		98.29		88.65		1	43.2447	39.6296	49.97	52.71	48.87	YCR053W	THR4		Threonine synthase, conserved protein that catalyzes formation of threonine from O-phosphohomoserine; expression is regulated by the GCN4-mediated general amino acid control pathway
301F12	YLL005C	2	0.3059	0.00127184	107.265	12.5653	100.47	11.9501	1	44.6622	41.6297	48.93	50.37	42.48	YLL005C	SPO75		Meiosis-specific protein of unknown function, required for spore wall formation during sporulation; dispensable for both nuclear divisions during meiosis
314E06	YHR112C	1	0.305913		94.76		86.18		1	43.5874	40.1944	55.48	59.37	53.43	YHR112C			Putative protein of unknown function; green fluorescent protein (GFP)-fusion protein localizes to the cytoplasm
321A10	YDR150W	1	0.305978		80.84		74.13		1	45.929	41.6297	69.29	60.37	34.25	YDR150W	NUM1	PAC12	Protein required for nuclear migration, localizes to the mother cell cortex and the bud tip; may mediate interactions of dynein and cytoplasmic microtubules with the cell cortex
333F07	YLR446W	1	0.306022		96.66		88.53		1	43.3237	39.6296	51.87	54.26	50.7	YLR446W			Putative protein of unknown function with similarity to hexokinases; transcript is upregulated during sporulation and the unfolded protein response; YLR446W is not an essential gene
323D11	YPR156C	1	0.30612		97.61		90.09		1	45.3115	41.6297	48.99	50.97	34.25	YPR156C	TPO3		Polyamine transport protein specific for spermine; localizes to the plasma membrane; member of the major facilitator superfamily
315B02	YHR209W	1	0.306161		84.61		77.27		1	42.8447	40.1944	48.67	50.73	51.6	YHR209W	CRG1		mRNA binding protein and putative S-adenosylmethionine-dependent methyltransferase; mediates cantharidin resistance
345C08	YDL011C	1	0.306209		101.91		93.47		1	46.0162	42.5071	49.39	51.26	48.87	YDL011C
310H12	YDR338C	2	0.306229	0.0294896	98.025	3.21734	90.135	3.0052	1	44.4303	41.0516	49.48	51.63	48.87	YDR338C			Putative protein of unknown function, member of the multi-drug and toxin extrusion (MATE) family of the multidrug/oligosaccharidyl-lipid/polysaccharide (MOP) exporter superfamily
334F08	YLR146C	1	0.306244		100.66		94.85		1	42.4905	38.7924	62.34	55.52	48.87	YLR146C	SPE4		Spermine synthase, required for the biosynthesis of spermine and also involved in biosynthesis of pantothenic acid
340G07	YIL161W	1	0.306263		108.81		99.93		1	47.4839	43.0989	51	53.22	48.87	YIL161W			Putative protein of unknown function; green fluorescent protein (GFP)-fusion protein localizes to the cytoplasm; mRNA is enriched in Scp160p-associated mRNPs; YIL161W is a non-essential gene
344B08	YPR043W	1	0.306276		105.02		102.06		4.3	51.9158	48.3519	47.62	49.81	51.6	YPR043W	RPL43A	L43A	Protein component of the large (60S) ribosomal subunit, identical to Rpl43Bp and has similarity to rat L37a ribosomal protein; null mutation confers a dominant lethal phenotype
334D02	YJR094C	1	0.306341		99.44		92.64		1	45.5667	41.6297	53.67	56.93	51.6	YJR094C	IME1		Master regulator of meiosis that is active only during meiotic events, activates transcription of early meiotic genes through interaction with Ume6p, degraded by the 26S proteasome following phosphorylation by Ime2p
341C05	YNL057W	1	0.306402		99.57		91.32		1	43.9435	40.1944	50.96	52.61	47.94	YNL057W
326B06	YNL168C	1	0.306464		101.37		92.51		1	43.727	41.0516	46.17	48.1	42.48	YNL168C	FMP41		Putative protein of unknown function; GFP-fusion protein is induced in response to the DNA-damaging agent MMS; the authentic, non-tagged protein is detected in highly purified mitochondria in high-throughput studies
302H09	YLR122C	2	0.3065	0.0626866	100.31	9.56008	94.6	5.81242	1	42.0486	38.7924	55.37	57.83	39.71	YLR122C
304C01	YMR177W	1	0.306503		93.87		86.33		1	43.736	40.1944	46.17	48.54	48.87	YMR177W	MMT1		Putative metal transporter involved in mitochondrial iron accumulation; closely related to Mmt2p
304C12	YMR191W	2	0.306515	0.066673	94.745	3.18905	88.6	3.87495	1	44.2671	41.0516	48.06	50.3	46.11	YMR191W	SPG5		Protein required for survival at high temperature during stationary phase; not required for growth on nonfermentable carbon sources
328G06	YHR079C-B	1	0.306566		94.47		86.83		1	46.6801	43.0989	58.82	59.62	48.87	YHR079C-B
345D02	YDL022W	1	0.306659		101.85		91.9		1	45.3306	41.0516	49.55	52.1	52.51	YDL022W	GPD1	OSR5 DAR1 HOR1 OSG1	NAD-dependent glycerol-3-phosphate dehydrogenase, key enzyme of glycerol synthesis, essential for growth under osmotic stress; expression regulated by high-osmolarity glycerol response pathway; homolog of Gpd2p
322B09	YGL263W	1	0.306727		92.15		83.01		1	41.986	39.6296	52.41	55.66	28.78	YGL263W	COS12		Protein of unknown function, member of the DUP380 subfamily of conserved, often subtelomerically-encoded proteins
308F04	YPL200W	1	0.306738		100		91.27		1	45.8776	42.5071	47.46	51.37	48.87	YPL200W	CSM4		Protein required for accurate chromosome segregation during meiosis; involved in meiotic telomere clustering (bouquet formation) and telomere-led rapid prophase movements
324E07	YBL008W	1	0.306765		93.65		84.29		1	43.9181	40.1944	47.46	52	53.43	YBL008W	HIR1		Subunit of the HIR complex, a nucleosome assembly complex involved in regulation of histone gene transcription; contributes to nucleosome formation, heterochromatic gene silencing, and formation of functional kinetochores
307E03	YOL017W	1	0.306804		98.47		90.26		1	44.4193	41.0516	50.87	52.27	55.27	YOL017W	ESC8		Protein involved in telomeric and mating-type locus silencing, interacts with Sir2p and also interacts with the Gal11p, which is a component of the RNA pol II mediator complex
332D11	YJL058C	1	0.306826		103.73		94.8		1	43.6386	40.1944	54.02	55.44	50.7	YJL058C	BIT61		Subunit of TORC2 (Tor2p-Lst8p-Avo1-Avo2-Tsc11p-Bit61p-Slm1p-Slm2p), a membrane-associated complex that regulates cell cycle-dependent actin cytoskeletal dynamics during polarized growth and cell wall integrity
303C03	YML048W-A	1	0.306875		110.87		103.63		1	44.7092	41.6297	62.16	55.11	45.21	YML048W-A
313H05	YHL006C	1	0.306893		90.94		84.36		1	43.7406	40.1944	53.5	53.84	52.51	YHL006C	SHU1		Protein involved in a Rad51p-, Rad54p-dependent pathway for homologous recombination repair, important for error-free repair of spontaneous and induced DNA lesions to protect the genome from mutation; associates with Shu2p, Psy3p, and Csm2p
339G10	YBR022W	1	0.306894		101.63		92.57		1	57.6307	52.645	46.64	50.99	11.41	YBR022W	POA1		Phosphatase that is highly specific for ADP-ribose 1''-phosphate, a tRNA splicing metabolite; may have a role in regulation of tRNA splicing
324F05	YBL024W	1	0.306895		103.61		93.85		1	64.1976	61.9787	57.83	62.47	62.55	YBL024W	NCL1	TRM4	S-adenosyl-L-methionine-dependent tRNA: m5C-methyltransferase, methylates cytosine to m5C at several positions in tRNAs and intron-containing pre-tRNAs; similar to Nop2p and human proliferation associated nucleolar protein p120
333B05	YJR110W	1	0.306896		97.17		88.18		1	45.8511	42.5071	57.26	59.88	50.7	YJR110W	YMR1		Phosphatidylinositol 3-phosphate (PI3P) phosphatase; involved in various protein sorting pathways, including CVT targeting and endosome to vacuole transport; has similarity to the conserved myotubularin dual specificity phosphatase family
315B05	YCL001W	1	0.306949		84.97		77.63		1	45.3069	42.5071	49.65	52.78	49.78	YCL001W	RER1		Protein involved in retention of membrane proteins, including Sec12p, in the ER; localized to Golgi; functions as a retrieval receptor in returning membrane proteins to the ER
317C03	YKL103C	1	0.306969		101.29		93.68		1	41.6464	38.2408	50.2	52.61	52.51	YKL103C	LAP4	YSC1 APE1 API	Vacuolar aminopeptidase yscI; zinc metalloproteinase that belongs to the peptidase family M18; often used as a marker protein in studies of autophagy and cytosol to vacuole targeting (CVT) pathway
342G06	YCR048W	1	0.306978		96.85		88.42		1	42.7157	39.6296	53.16	56.36	45.21	YCR048W	ARE1	SAT2	Acyl-CoA:sterol acyltransferase, isozyme of Are2p; endoplasmic reticulum enzyme that contributes the major sterol esterification activity in the absence of oxygen
347D04	YER132C	1	0.306997		98.55		89.02		1	44.0454	41.0516	51.47	53.95	43.4	YER132C	PMD1		Protein with an N-terminal kelch-like domain, putative negative regulator of early meiotic gene expression; required, with Mds3p, for growth under alkaline conditions
319G04	YLR341W	1	0.307018		93.46		87.57		1	42.5349	39.6296	49.29	51.8	48.87	YLR341W	SPO77		Meiosis-specific protein of unknown function, required for spore wall formation during sporulation; dispensable for both nuclear divisions during meiosis
326D09	YKR007W	1	0.307034		110.01		102.25		1	51.4106	48.3519	49.16	51.3	43.4	YKR007W	MEH1	GSE2 EGO1	Component of the EGO complex, which is involved in the regulation of microautophagy, and of the GSE complex, which is required for proper sorting of amino acid permease Gap1p; loss results in a defect in vacuolar acidification
321D06	YDR200C	1	0.30704		118.22		107.99		1	61.5631	55.4092	57.98	58.67	33.33	YDR200C	VPS64	FAR9	Protein required for cytoplasm to vacuole targeting of proteins; forms a complex with Far3p and Far7p to Far11p involved in recovery from pheromone-induced cell cycle arrest; mutant has increased aneuploidy tolerance
310D01	YDR070C	1	0.307102		98.75		92.06		1	44.64	41.6297	46.14	49.58	49.78	YDR070C	FMP16		Putative protein of unknown function; proposed to be involved in responding to conditions of stress; the authentic, non-tagged protein is detected in highly purified mitochondria in high-throughput studies
329B09	YMR062C	1	0.307144		98.96		91.14		1	43.5135	40.1944	61.41	64.75	57.08	YMR062C	ARG7	ECM40	Mitochondrial ornithine acetyltransferase, catalyzes the fifth step in arginine biosynthesis; also possesses acetylglutamate synthase activity, regenerates acetylglutamate while forming ornithine
339G04	YBR014C	1	0.307161		96.84		87.35		1	43.1365	39.6296	43.98	47.46	53.43	YBR014C	GRX7		Cis-golgi localized monothiol glutaredoxin; more similar in activity to dithiol than other monothiol glutaredoxins; involved in the oxidative stress response; does not bind metal ions; functional overlap with GRX6
348D09	YFL004W	1	0.307252		103.69		96.57		1	43.3021	39.6296	50.9	53.91	50.7	YFL004W	VTC2	PHM1	Subunit of the vacuolar transporter chaperone (VTC) complex involved in membrane trafficking, vacuolar polyphosphate accumulation, microautophagy and non-autophagic vacuolar fusion
345A12	YBR147W	1	0.307305		104.09		95.17		1	42.8361	40.1944	47.62	49.42	50.7	YBR147W	RTC2	RRT11	Protein of unknown function; identified in a screen for mutants with decreased levels of rDNA transcription; detected in highly purified mitochondria; null mutant suppresses cdc13-1; similar to a G-protein coupled receptor from S. pombe
340C09	YBR075W	1	0.307363		106.54		97.67		1	45.857	41.6297	50.44	52.85	45.21	YBR075W
310C08	YDR063W	1	0.307387		94.9		89.3		1	44.6785	41.6297	50.07	53.67	51.6	YDR063W	AIM7	GMF GMF1 Glia maturation factor	Protein that interacts with Arp2/3 complex to stimulate actin filament debranching and inhibit actin nucleation; has similarity to Cof1p and also to human glia maturation factor (GMF); null mutant displays elevated mitochondrial genome loss
317H02	YKL188C	1	0.307389		83.61		77.35		1	43.2705	40.1944	47.08	49.58	46.11	YKL188C	PXA2	PAT1	Subunit of a heterodimeric peroxisomal ATP-binding cassette transporter complex (Pxa1p-Pxa2p), required for import of long-chain fatty acids into peroxisomes; similarity to human adrenoleukodystrophy transporter and ALD-related proteins
344B02	YPR022C	1	0.3075		96.75		90.65		1	54.5059	48.9966	48.26	51.2	40.65	YPR022C			Putative protein of unknown function; green fluorescent protein (GFP)-fusion protein localizes to both the cytoplasm and the nucleus and is induced in response to the DNA-damaging agent MMS
332H06	YMR154C	1	0.307502		97.19		90.5		1	41.7503	38.2408	50.37	50.27	37.91	YMR154C	RIM13	CPL1	Calpain-like cysteine protease involved in proteolytic activation of Rim101p in response to alkaline pH; has similarity to A. nidulans palB
345B06	YBR158W	1	0.307519		103.91		95.29		1	44.4503	40.1944	48.32	50.2	48.87	YBR158W	AMN1	CST13 ICS4	Protein required for daughter cell separation, multiple mitotic checkpoints, and chromosome stability; contains 12 degenerate leucine-rich repeat motifs; expression is induced by the Mitotic Exit Network (MEN)
335G02	YBR298C	3	0.307612	0.0924099	100.43	3.1363	92.87	4.35108	1	52.7916	48.9966	65.73	69.95	57.08	YBR298C	MAL31	MALT MAL3T	Maltose permease, high-affinity maltose transporter (alpha-glucoside transporter); encoded in the MAL3 complex locus; member of the 12 transmembrane domain superfamily of sugar transporters; functional in genomic reference strain S288C
327H03	YIL057C	1	0.307631		105.86		96.72		1	46.6988	43.0989	63.39	63.28	53.43	YIL057C	RGI2		Protein of unknown function involved in energy metabolism under respiratory conditions; expression induced under carbon limitation and repressed under high glucose
324A04	YFL034C-A	1	0.307692		95.42		86.64		1	42.3297	39.6296	57.73	57.15	45.21	YFL034C-A	RPL22B	YL31 YFL035C-B L22B rp4 l1c	Protein component of the large (60S) ribosomal subunit, has similarity to Rpl22Ap and to rat L22 ribosomal protein
301C07	YAL027W	2	0.307729	0.0207841	103.77	0.820244	97.29	0.834386	1	43.232	38.7924	53.12	56.58	47.05	YAL027W	SAW1		Protein involved in Rad1p/Rad10p-dependent removal of 3'-nonhomologous tails during double-strand break repair via single-strand annealing; green fluorescent protein (GFP)-fusion protein localizes to the nucleus
315C07	YCL026C	1	0.307769		85.25		77.59		1	52.2444	48.9966	48.61	51.23	47.05	YCL026C
323G06	YCR094W	1	0.307775		123.47		117.8		1	52.0116	48.3519	43.76	47.05	25.11	YCR094W	CDC50		Endosomal protein that interacts with phospholipid flippase Drs2p; interaction with Cdc50p is essential for Drs2p catalytic activity; mutations affect cell polarity and polarized growth; similar to Ynr048wp and Lem3p
324E04	YBL003C	1	0.307932		92.57		83.56		1	42.6111	39.6296	52.92	54.74	52.51	YBL003C	HTA2	H2A2	Histone H2A, core histone protein required for chromatin assembly and chromosome function; one of two nearly identical (see also HTA1) subtypes; DNA damage-dependent phosphorylation by Mec1p facilitates DNA repair; acetylated by Nat4p
316D11	YLR224W	1	0.307942		97.48		89.84		1	42.8855	40.1944	51.67	55.59	49.78	YLR224W			F-box protein and component of SCF ubiquitin ligase complexes involved in ubiquitin-dependent protein catabolism; readily monoubiquitinated in vitro by SCF-Ubc4 complexes; YLR224W is not an essential gene
325B11	YGL003C	1	0.307964		96.89		88.15		1	44.1257	39.6296	43.28	45.64	40.65	YGL003C	CDH1	HCT1	Cell-cycle regulated activator of the anaphase-promoting complex/cyclosome (APC/C), which directs ubiquitination of cyclins resulting in mitotic exit; targets the APC/C to specific substrates including Cdc20p, Ase1p, Cin8p and Fin1p
314B06	YHR046C	1	0.308069		98.16		89.08		1	42.0476	39.6296	51.33	54.64	48.87	YHR046C	INM1		Inositol monophosphatase, involved in biosynthesis of inositol and in phosphoinositide second messenger signaling; INM1 expression increases in the presence of inositol and decreases upon exposure to antibipolar drugs lithium and valproate
326A09	YNL191W	1	0.308084		104.06		93.98		1	44.717	41.6297	48.74	49.84	39.71	YNL191W	DUG3		Probable glutamine amidotransferase, forms a complex with Dug1p and Dug2p to degrade glutathione (GSH) and other peptides containing a gamma-glu-X bond in an alternative pathway to GSH degradation by gamma-glutamyl transpeptidase (Ecm38p)
342A05	YGR248W	1	0.308254		99.66		90.4		1	44.07	41.0516	46.42	48.32	48.87	YGR248W	SOL4		6-phosphogluconolactonase with similarity to Sol3p
331G11	YPR073C	1	0.308309		91.69		84.75		1	45.4919	42.5071	54.71	55.97	53.43	YPR073C	LTP1		Protein phosphotyrosine phosphatase of unknown cellular role; activated by adenine
303G02	YMR023C	1	0.308327		101.84		95.29		1	43.2537	40.1944	49.48	53.12	56.19	YMR023C	MSS1	PET53	Mitochondrial protein, forms a heterodimer complex with Mto1p that performs the 5-carboxymethylaminomethyl modification of the wobble uridine base in mitochondrial tRNAs; similar to human GTPBP3
316D06	YLR217W	1	0.308387		98.98		90.91		1	44.5134	41.6297	53.67	58.49	50.7	YLR217W
302D09	YLR055C	2	0.308396	0.113268	104.475	5.50836	99.545	4.84368	1	43.882	39.6296	49.26	49.71	41.54	YLR055C	SPT8		Subunit of the SAGA transcriptional regulatory complex but not present in SAGA-like complex SLIK/SALSA, required for SAGA-mediated inhibition at some promoters
341E02	YNL080C	1	0.308398		113.33		104.73		6	41.6467	39.6296	47.71	50.53	47.05	YNL080C	EOS1		Protein involved in N-glycosylation; deletion mutation confers sensitivity to exidative stress and shows synthetic lethality with mutations in the spindle checkpoint genes BUB3 and MAD1; YNL080C is not an essential gene
316B06	YLR180W	1	0.308458		82.32		76.42		1	41.7019	38.7924	48.74	51.1	50.7	YLR180W	SAM1	ETH10	S-adenosylmethionine synthetase, catalyzes transfer of the adenosyl group of ATP to the sulfur atom of methionine; one of two differentially regulated isozymes (Sam1p and Sam2p)
313F08	YHL032C	1	0.308477		85.88		79.51		1	41.9026	38.7924	51.1	53.6	48.87	YHL032C	GUT1		Glycerol kinase, converts glycerol to glycerol-3-phosphate; glucose repression of expression is mediated by Adr1p and Ino2p-Ino4p; derepression of expression on non-fermentable carbon sources is mediated by Opi1p and Rsf1p
313G05	YHL020C	1	0.308486		87.19		80.8		1	45.6433	42.5071	63.6	67.3	61.65	YHL020C	OPI1		Transcriptional regulator of a variety of genes; phosphorylation by protein kinase A stimulates Opi1p function in negative regulation of phospholipid biosynthetic genes; involved in telomere maintenance
334B12	YGL235W	1	0.308492		99.18		92.96		1	45.6686	41.6297	50.11	52.2	51.6	YGL235W			Putative protein of unknown function; potential Cdc28p substrate; null mutant displays increased resistance to antifungal agents gliotoxin, cycloheximide and H2O2
342G12	YCR073C	1	0.308523		99.47		89.96		1	42.6695	40.1944	49.45	51.43	47.05	YCR073C	SSK22		MAP kinase kinase kinase of the HOG1 mitogen-activated signaling pathway; functionally redundant with, and homologous to, Ssk2p; interacts with and is activated by Ssk1p; phosphorylates Pbs2p
336A06	YCR079W	1	0.308554		100.7		91.39		1	45.4487	41.6297	58.23	59.88	48.87	YCR079W	PTC6	PPP2 AUP1	Mitochondrial type 2C protein phosphatase (PP2C) with similarity to mammalian PP1Ks; involved in mitophagy; null mutant is sensitive to rapamycin and has decreased phosphorylation of the Pda1 subunit of pyruvate dehydrogenase
306B08	YOR039W	1	0.308574		104.61		98.18		1	42.5632	38.7924	54.31	44.42	44.3	YOR039W	CKB2	CK2 subunit	Beta' regulatory subunit of casein kinase 2 (CK2), a Ser/Thr protein kinase with roles in cell growth and proliferation; CK2, comprised of CKA1, CKA2, CKB1 and CKB2, has many substrates including transcription factors and all RNA polymerase
302F12	YLR093C	3	0.308578	0.0557302	97.7767	6.846	91.17	5.72921	1	42.6868	39.6296	49.03	50.6	34.24	YLR093C	NYV1	MAM2	v-SNARE component of the vacuolar SNARE complex involved in vesicle fusion; inhibits ATP-dependent Ca(2+) transport activity of Pmc1p in the vacuolar membrane
343C09	YPL183C	1	0.30862		102.91		94.63		1	47.0008	43.0989	49.03	51.3	51.6	YPL183C	RTT10		Cytoplasmic protein with a role in regulation of Ty1 transposition
323E10	YPR174C	1	0.308622		97.26		89.62		1	45.1076	41.6297	54.67	55.76	55.27	YPR174C			Protein of unknown function; green fluorescent protein (GFP)-fusion protein localizes to the nuclear periphery; potential Cdc28p substrate
312G03	YER079W	1	0.308651		100.64		93.65		1	43.514	40.1944	52.44	54.47	54.36	YER079W			Putative protein of unknown function
321E11	YDR225W	1	0.30867		113.27		103.08		1	45.1262	42.5071	68.87	59.54	26.03	YDR225W	HTA1	SPT11 H2A1	Histone H2A, core histone protein required for chromatin assembly and chromosome function; one of two nearly identical subtypes (see also HTA2); DNA damage-dependent phosphorylation by Mec1p facilitates DNA repair; acetylated by Nat4p
341D11	YNL076W	1	0.308711		104.51		95.09		1	40.3489	37.4233	57.69	58.89	51.6	YNL076W	MKS1	LYS80	Pleiotropic negative transcriptional regulator involved in Ras-CAMP and lysine biosynthetic pathways and nitrogen regulation; involved in retrograde (RTG) mitochondria-to-nucleus signaling
304H05	YMR266W	2	0.308744	0.0685885	91.2	1.64049	84.435	1.32229	3.7	44.2185	41.0516	48.84	50.7	50.7	YMR266W	RSN1		Membrane protein of unknown function; overexpression suppresses NaCl sensitivity of sro7 mutant cells by restoring sodium pump (Ena1p) localization to the plasma membrane
342G03	YCR032W	1	0.308748		102.34		93.07		1	44.1359	41.0516	49.35	52.48	41.54	YCR032W	BPH1		PProtein homologous to human Chediak-Higashi syndrome and murine Beige proteins, which are implicated in disease syndromes due to defective lysosomal trafficking; mutant phenotype and genetic interactions suggest a role in protein sorting
339E11	YBL098W	1	0.308754		99.05		89.8		1	42.9598	38.7924	42.99	47	47.95	YBL098W	BNA4		Kynurenine 3-mono oxygenase, required for the de novo biosynthesis of NAD from tryptophan via kynurenine; expression regulated by Hst1p; putative therapeutic target for Huntington disease
330F08	YOR306C	1	0.308781		99.55		90.71		1	42.206	39.6296	64.55	63.35	42.48	YOR306C	MCH5		Plasma membrane riboflavin transporter; facilitates the uptake of vitamin B2; required for FAD-dependent processes; sequence similarity to mammalian monocarboxylate permeases, however mutants are not deficient in monocarboxylate transport
329G11	YOL119C	1	0.308833		101.29		91.1		1	44.5895	41.6297	51.2	53.22	48.87	YOL119C	MCH4		Protein with similarity to mammalian monocarboxylate permeases, which are involved in transport of monocarboxylic acids across the plasma membrane; mutant is not deficient in monocarboxylate transport
346B07	YDR479C	1	0.308836		101.35		93.74		1	44.2099	41.0516	47.17	49.32	48.87	YDR479C	PEX29		Peroxisomal integral membrane peroxin, involved in the regulation of peroxisomal size, number and distribution; genetic interactions suggest that Pex28p and Pex29p act at steps upstream of those mediated by Pex30p, Pex31p, and Pex32p
317B09	YKL096W	1	0.308859		100.73		92.52		1	41.6591	38.2408	49.91	52.82	52.51	YKL096W	CWP1	YJU1	Cell wall mannoprotein that localizes specifically to birth scars of daughter cells, linked to a beta-1,3- and beta-1,6-glucan heteropolymer through a phosphodiester bond; required for propionic acid resistance
315A07	YHR199C	1	0.308873		82.98		76.09		1	43.5648	40.1944	52.2	53.74	49.78	YHR199C	AIM46	FMP34	Putative protein of unknown function; the authentic, non-tagged protein is detected in highly purified mitochondria in high-throughput studies; null mutant displays elevated frequency of mitochondrial genome loss
317C02	YKL102C	1	0.308903		100.03		92.29		1	40.8431	37.4233	51.2	54.08	54.36	YKL102C
343E03	YKR106W	1	0.309046		104.11		94.82		1	44.2389	40.1944	47.49	49.75	43.4	YKR106W			Protein of unconfirmed function; displays a topology characteristic of the Major Facilitators Superfamily of membrane proteins; coding sequence 98% identical to that of YCL073C
303E02	YML008C	1	0.309046		106.56		99.85		3.2	42.5168	39.6296	44.36	48.54	43.4	YML008C	ERG6	VID1 ISE1 LIS1 SED6	Delta(24)-sterol C-methyltransferase, converts zymosterol to fecosterol in the ergosterol biosynthetic pathway by methylating position C-24; localized to both lipid particles and mitochondrial outer membrane
322E10	YPL067C	1	0.309091		97.06		91.04		1	43.0195	39.6296	57.41	52.6	55.25	YPL067C			Putative protein of unknown function; green fluorescent protein (GFP)-fusion protein localizes to the cytoplasm; YPL067C is not an essential gene
307C03	YOR374W	2	0.309123	0.0691897	91.83	14.3401	83.025	13.6259	1	42.9576	39.6296	52.92	53.71	49.78	YOR374W	ALD4	ALD7 ALDH2	Mitochondrial aldehyde dehydrogenase, required for growth on ethanol and conversion of acetaldehyde to acetate; phosphorylated; activity is K+ dependent; utilizes NADP+ or NAD+ equally as coenzymes; expression is glucose repressed
333C03	YJR147W	1	0.309157		98.62		89.92		1	43.7915	38.7924	50.7	53.12	47.94	YJR147W	HMS2		Protein with similarity to heat shock transcription factors; overexpression suppresses the pseudohyphal filamentation defect of a diploid mep1 mep2 homozygous null mutant
311A05	YDR348C	1	0.309159		104.41		95.7		1	45.1487	41.6297	52.58	54.54	46.11	YDR348C			Protein of unknown function; green fluorescent protein (GFP)-fusion protein localizes to the cell periphery and bud neck; potential Cdc28p substrate
312C11	YER019W	1	0.30919		77.75		71.86		1	41.9345	37.4233	67.58	59.68	15.99	YER019W	ISC1		Mitochondrial membrane localized inositol phosphosphingolipid phospholipase C, hydrolyzes complex sphingolipids to produce ceramide; activated by phosphatidylserine, cardiolipin, and phosphatidylglycerol; mediates Na+ and Li+ halotolerance
331B12	YMR109W	1	0.309206		90.28		81.2		1	43.2987	41.0516	46.42	47.84	42.48	YMR109W	MYO5		One of two type I myosins; contains proline-rich tail homology 2 (TH2) and SH3 domains; MYO5 deletion has little effect on growth, but myo3 myo5 double deletion causes severe defects in growth and actin cytoskeleton organization
307D06	YOL004W	1	0.309222		96.6		86.76		3.3	52.825	49.647	57.22	61.38	62.55	YOL004W	SIN3	CPE1 UME4 GAM2 SDS16 SDI1 RPD1	Component of the Sin3p-Rpd3p histone deacetylase complex, involved in transcriptional repression and activation of diverse processes, including mating-type switching and meiosis; involved in the maintenance of chromosomal integrity
301F04	YAR037W	2	0.309246	0.0182075	102.75	11.144	96.215	10.5995	1	42.8768	39.6296	49.88	52.82	36.99	YAR037W
318A10	YOR124C	1	0.309415		89.68		83.89		1	46.0844	43.0989	51.6	53.6	53.43	YOR124C	UBP2		Ubiquitin-specific protease that removes ubiquitin from ubiquitinated proteins; interacts with Rsp5p and is required for MVB sorting of membrane proteins; can cleave polyubiquitin and has isopeptidase activity
330B02	YHL024W	1	0.309424		102.89		94.22		1	45.5092	42.5071	54.71	54.57	48.87	YHL024W	RIM4		Putative RNA-binding protein required for the expression of early and middle sporulation genes
314D08	YHR097C	1	0.309436		93.64		84.32		1	42.2495	39.6296	48.96	53.4	56.19	YHR097C			Putative protein of unknown function; green fluorescent protein (GFP)-fusion protein localizes to the cytoplasm and the nucleus
307B07	YOR360C	1	0.309441		111.84		102.9		1	44.8715	41.0516	70.68	55.83	19.63	YOR360C	PDE2	SRA5	High-affinity cyclic AMP phosphodiesterase, component of the cAMP-dependent protein kinase signaling system, protects the cell from extracellular cAMP, contains readthrough motif surrounding termination codon
301F05	YAR040C	2	0.309448	0.0572199	104.66	10.451	97.525	9.07218	1	42.3178	38.7924	55.8	58.41	42.48	YAR040C
326F04	YKR042W	1	0.309471		94.38		85.8		1	45.338	40.1944	47.62	49.26	27.86	YKR042W	UTH1		Mitochondrial outer membrane and cell wall localized SUN family member involved in cell wall biogenesis and required for mitochondrial autophagy; involved in the oxidative stress response, life span during starvation, and cell death
311H09	YEL038W	1	0.309543		101.17		93.44		1	42.6241	39.6296	48.9	51.37	31.52	YEL038W	UTR4		Protein with sequence similarity to 2,3-diketo-5-methylthiopentyl-1-phosphate enolase-phosphatases, involved in methionine salvage; found in both the cytoplasm and nucleus
328E10	YGR260W	1	0.309548		95.78		85.65		1	45.6574	42.5071	52.78	55.16	46.11	YGR260W	TNA1		High affinity nicotinic acid plasma membrane permease, responsible for uptake of low levels of nicotinic acid; expression of the gene increases in the absence of extracellular nicotinic acid or para-aminobenzoate (PABA)
321A12	YDR152W	1	0.309593		82.51		74.98		1	43.4404	40.1944	54.95	55.44	50.7	YDR152W	GIR2		Highly-acidic cytoplasmic RWD domain-containing protein of unknown function; forms a complex with Rbg2p; interacts with Rbg1p and Gcn1p; associates with translating ribosomes; putative intrinsically unstructured protein
308A02	YOL072W	1	0.309685		98.46		90.24		1	45.9654	41.0516	58.89	62.32	51.6	YOL072W	THP1	BUD29	Nuclear pore-associated protein, forms a complex with Sac3p that is involved in transcription and in mRNA export from the nucleus; contains a PAM domain implicated in protein-protein binding
339F08	YBR005W	1	0.309756		99.21		90.49		1	43.9642	40.1944	43.76	47	33.34	YBR005W	RCR1	SSH6	Protein of the ER membrane involved in cell wall chitin deposition; may function in the endosomal-vacuolar trafficking pathway, helping determine whether plasma membrane proteins are degraded or routed to the plasma membrane
314C10	YHR080C	1	0.30983		97.16		88.15		1	42.262	39.6296	47.59	51.37	24.21	YHR080C			Protein of unknown function that may interact with ribosomes, based on co-purification experiments; the authentic, non-tagged protein is detected in highly purified mitochondria in high-throughput studies
307F02	YOL032W	1	0.309845		93.9		86.3		1	47.3385	43.9967	44.66	47.02	25.11	YOL032W	OPI10		Protein with a possible role in phospholipid biosynthesis, based on inositol-excreting phenotype of the null mutant and its suppression by exogenous choline
327E05	YDR334W	1	0.30985		108.2		98.55		3.4	45.5332	41.0516	53.09	54.88	47.05	YDR334W	SWR1		Swi2/Snf2-related ATPase that is the structural component of the SWR1 complex, which exchanges histone variant H2AZ (Htz1p) for chromatin-bound histone H2A
319H07	YLR365W	1	0.309881		97.77		91.52		1	42.9997	40.1944	49.94	52.31	53.43	YLR365W
304C02	YMR178W	1	0.309922		91.91		84.42		1	43.8501	40.1944	49.45	51.63	43.4	YMR178W			Putative protein of unknown function; green fluorescent protein (GFP)-fusion protein localizes to both the cytoplasm and nucleus and is induced in response to the DNA-damaging agent MMS; YMR178W is not an essential gene
307A06	YOR346W	1	0.310014		102.13		92.34		1	44.4966	41.0516	52	53.09	48.87	YOR346W	REV1		Deoxycytidyl transferase, forms a complex with the subunits of DNA polymerase zeta, Rev3p and Rev7p; involved in repair of abasic sites in damaged DNA
318C08	YOR166C	1	0.31003		91.54		84.99		1	43.7872	41.0516	47.33	50.77	51.6	YOR166C	SWT1		RNA endoribonuclease involved in perinuclear mRNP quality control via the turnover of aberrant, unprocessed pre-mRNAs; interacts with subunits of THO/TREX, TREX-2, and RNA polymerase II; contains a PIN (PilT N terminus) domain
342D11	YKR041W	1	0.310084		100.59		90.61		1	44.3756	40.1944	48.26	50.01	44.3	YKR041W			Putative protein of unknown function; green fluorescent protein (GFP)-fusion protein localizes to the cytoplasm and nucleus
326H02	YDR247W	1	0.310087		97.67		89.23		1	48.6601	45.2132	52.72	55.44	58.91	YDR247W	VHS1		Cytoplasmic serine/threonine protein kinase; identified as a high-copy suppressor of the synthetic lethality of a sis2 sit4 double mutant, suggesting a role in G1/S phase progression; homolog of Sks1p
348C06	YCR107W	1	0.310106		95.01		88.75		1	42.103	38.7924	47.59	50.11	50.7	YCR107W	AAD3		Putative aryl-alcohol dehydrogenase with similarity to P. chrysosporium aryl-alcohol dehydrogenase; mutational analysis has not yet revealed a physiological role
345A03	YBR133C	1	0.310188		114.55		104.54		1	44.9508	41.6297	50.87	53.95	57.08	YBR133C	HSL7		Protein arginine N-methyltransferase that exhibits septin and Hsl1p-dependent bud neck localization and periodic Hsl1p-dependent phosphorylation; required along with Hsl1p for bud neck recruitment, phosphorylation, and degradation of Swe1p
334C12	YJR090C	1	0.310193		113.79		108.06		9.7	53.1722	48.9966	51.03	50.47	43.4	YJR090C	GRR1	CAT80 SSU2 SDC1 COT2	F-box protein component of the SCF ubiquitin-ligase complex; involved in carbon catabolite repression, glucose-dependent divalent cation transport, high-affinity glucose transport, morphogenesis, and sulfite detoxification
323A08	YPR001W	1	0.310236		100.54		92.61		1	42.9336	41.0516	52.07	53.19	55.27	YPR001W	CIT3		Dual specificity mitochondrial citrate and methylcitrate synthase; catalyzes the condensation of acetyl-CoA and oxaloacetate to form citrate and that of propionyl-CoA and oxaloacetate to form 2-methylcitrate
331G05	YPR065W	1	0.31024		111.16		102.56		1	48.5931	45.2132	55.8	57.95	59.82	YPR065W	ROX1	REO1	Heme-dependent repressor of hypoxic genes; contains an HMG domain that is responsible for DNA bending activity
311A01	YDR340W	1	0.310248		108.07		99.91		1	43.3688	39.6296	48.8	51.63	56.19	YDR340W
334E05	YJR124C	1	0.310277		102.98		97.13		1	43.1827	39.6296	51.87	55.16	53.43	YJR124C			Putative protein of unknown function; expression induced under calcium shortage
318A01	YOR111W	1	0.310296		84.4		80.13		1	44.0052	41.0516	48.42	50.24	47.05	YOR111W			Putative protein of unknown function
325F09	YGL090W	1	0.310304		93.43		89.4		1	42.4056	39.6296	48.48	51.4	52.51	YGL090W	LIF1		Component of the DNA ligase IV complex that mediates nonhomologous end joining in DNA double-strand break repair; physically interacts with Dnl4p and Nej1p; homologous to mammalian XRCC4 protein
336F11	YDL101C	1	0.310316		111.41		105.38		1	50.7433	46.1401	59.48	60.74	60.74	YDL101C	DUN1		Cell-cycle checkpoint serine-threonine kinase required for DNA damage-induced transcription of certain target genes, phosphorylation of Rad55p and Sml1p, and transient G2/M arrest after DNA damage; also regulates postreplicative DNA repair
338G11	YOR300W	1	0.310336		96.4		88.61		1	44.8674	41.6297	47.26	50.66	47.95	YOR300W
347C12	YER128W	1	0.31034		100.74		90.55		1	47.0362	43.0989	48.1	49.91	45.21	YER128W			Putative protein of unknown function
332C02	YJL095W	1	0.310375		100.62		92.73		1	43.432	41.0516	34.71	35.39	10.5	YJL095W	BCK1	SSP31 SLK1 LAS3 SAP3	Mitogen-activated protein (MAP) kinase kinase kinase acting in the protein kinase C signaling pathway, which controls cell integrity; upon activation by Pkc1p phosphorylates downstream kinases Mkk1p and Mkk2p
344B06	YPR031W	1	0.310475		96.34		90.35		1	45.498	41.6297	50.53	53.57	36.99	YPR031W	NTO1		Subunit of the NuA3 histone acetyltransferase complex that acetylates histone H3; contains PHD finger domain that interacts with methylated histone H3
304D04	YMR195W	1	0.310489		94.11		86.21		1	45.5275	41.6297	48.38	51.53	57.98	YMR195W	ICY1		Protein of unknown function, required for viability in rich media of cells lacking mitochondrial DNA; mutants have an invasive growth defect with elongated morphology; induced by amino acid starvation
346G09	YGL140C	1	0.310497		101.91		93.95		1	43.6795	40.1944	48.8	50.27	49.78	YGL140C			Putative protein of unknown function; non-essential gene; contains multiple predicted transmembrane domains
326E06	YKR018C	1	0.310508		96.97		87.9		1	43.3436	40.1944	57.09	49.68	43.38	YKR018C			Putative protein of unknown function; green fluorescent protein (GFP)-fusion protein localizes to the cytoplasm and nucleus
344G06	YBR098W	2	0.310592	0.112732	103.035	5.26795	96.11	4.01637	1	47.9201	44.6022	51.33	54.36	41.54	YBR098W	MMS4	SLX2 YBR100W	Subunit of the structure-specific Mms4p-Mus81p endonuclease that cleaves branched DNA; involved in recombination, DNA repair, and joint molecule formation/resolution during meiotic recombination
327H04	YIL064W	1	0.310595		99.34		90.02		1	44.8369	41.0516	57.01	57.22	43.4	YIL064W	SEE1		Probable lysine methyltransferase involved in the dimethylation of eEF1A (Tef1p/Tef2p); sequence similarity to S-adenosylmethionine-dependent methyltransferases of the seven beta-strand family; role in vesicular transport
303E11	YMR003W	2	0.310644	0.0374995	113.785	4.49013	104.91	7.6509	1	46.105	41.6297	39.29	40	24.21	YMR003W	AIM34		Protein of unknown function; GFP-fusion protein localizes to the mitochondria; null mutant is viable and displays reduced frequency of mitochondrial genome loss
309G04	YBR210W	1	0.31068		110.23		99.46		1	45.3069	41.6297	51.5	53.4	46.11	YBR210W	ERV15		Protein involved in export of proteins from the endoplasmic reticulum, has similarity to Erv14p
342F06	YBR280C	1	0.310683		97.16		87.91		1	44.3971	41.0516	49.19	51.67	45.21	YBR280C	SAF1		F-Box protein involved in proteasome-dependent degradation of Aah1p during entry of cells into quiescence; interacts with Skp1
324G08	YBL048W	1	0.310713		89.57		80.72		1	44.4326	41.0516	50.83	53.84	51.6	YBL048W
347C08	YER121W	1	0.310716		101.86		91.61		1	45.7784	41.6297	51.47	52.92	46.11	YER121W			Putative protein of unknown function; may be involved in phosphatase regulation and/or generation of precursor metabolites and energy
313H07	YHL003C	1	0.310727		85.89		79.13		1	40.1613	36.6176	56.04	56.43	52.51	YHL003C	LAG1		Ceramide synthase component, involved in synthesis of ceramide from C26(acyl)-coenzyme A and dihydrosphingosine or phytosphingosine, functionally equivalent to Lac1p
333C07	YKR087C	1	0.310752		96.73		88.55		1	50.0725	45.2132	51.37	54.47	53.43	YKR087C	OMA1		Metalloendopeptidase of the mitochondrial inner membrane, involved in turnover of membrane-embedded proteins; member of a family of predicted membrane-bound metallopeptidases in prokaryotes and higher eukaryotes
317H10	YOR107W	1	0.310809		84.65		77.93		1	44.8975	41.6297	51.8	53.22	46.11	YOR107W	RGS2		Negative regulator of glucose-induced cAMP signaling; directly activates the GTPase activity of the heterotrimeric G protein alpha subunit Gpa2p
302F10	YLR090W	2	0.310817	0.0440285	100.795	10.246	95.235	6.92258	1	42.2216	39.6296	48.19	51.2	44.3	YLR090W	XDJ1		Putative chaperone, homolog of E. coli DnaJ, closely related to Ydj1p; the authentic, non-tagged protein is detected in highly purified mitochondria in high-throughput studies
327B09	YDR284C	1	0.310868		91.57		82.98		1	44.3132	41.0516	51	54.64	56.19	YDR284C	DPP1	ZRG1	Diacylglycerol pyrophosphate (DGPP) phosphatase, zinc-regulated vacuolar membrane-associated lipid phosphatase, dephosphorylates DGPP to phosphatidate (PA) and Pi, then PA to diacylglycerol; involved in lipid signaling and cell metabolism
329E04	YNR075W	1	0.310877		97.01		87.45		1	44.0718	41.0516	60.68	54.83	58	YNR075W	COS10		Protein of unknown function, member of the DUP380 subfamily of conserved, often subtelomerically-encoded proteins
333D06	YKR100C	1	0.310894		97.58		88.81		1	43.0961	39.6296	51.43	53.57	48.87	YKR100C	SKG1	YKR099C-A	Transmembrane protein with a role in cell wall polymer composition; localizes on the inner surface of the plasma membrane at the bud and in the daughter cell
320A10	YLR386W	1	0.310931		117.31		110.09		7.2	61.994	57.5446	74.68	62.75	38.81	YLR386W	VAC14		Protein involved in regulated synthesis of PtdIns(3,5)P(2), in control of trafficking of some proteins to the vacuole lumen via the MVB, and in maintenance of vacuole size and acidity; interacts with Fig4p; activator of Fab1p
340H06	YIR001C	1	0.311016		103.53		94.42		1	41.8883	38.2408	40.74	43.22	46.11	YIR001C	SGN1	RBP1 RBP29	Cytoplasmic RNA-binding protein, contains an RNA recognition motif (RRM); may have a role in mRNA translation, as suggested by genetic interactions with genes encoding proteins involved in translational initiation
311D08	YDR406W	1	0.311018		99.93		91.87		1	43.1071	38.7924	49.81	54.5	60.74	YDR406W	PDR15		Plasma membrane ATP binding cassette (ABC) transporter, multidrug transporter and general stress response factor implicated in cellular detoxification; regulated by Pdr1p, Pdr3p and Pdr8p; promoter contains a PDR responsive element
345B08	YBR161W	1	0.311093		101.54		93.11		1	45.3184	42.5071	42.63	45	44.3	YBR161W	CSH1		Probable catalytic subunit of a mannosylinositol phosphorylceramide (MIPC) synthase, forms a complex with probable regulatory subunit Csg2p; function in sphingolipid biosynthesis is overlapping with that of Sur1p
323B12	YPR125W	1	0.31113		100.8		92.03		3.8	46.6854	42.5071	52.2	53.46	53.43	YPR125W	YLH47	MRS7	Mitochondrial inner membrane protein exposed to the mitochondrial matrix, associates with mitochondrial ribosomes, NOT required for respiratory growth; homolog of human Letm1, a protein implicated in Wolf-Hirschhorn syndrome
327A06	YDR263C	1	0.31114		92.9		84.04		1	45.3125	42.5071	58.12	59.4	54.36	YDR263C	DIN7	DIN3	Mitochondrial nuclease functioning in DNA repair and replication, modulates the stability of the mitochondrial genome, induced by exposure to mutagens, also induced during meiosis at a time nearly coincident with commitment to recombination
327F06	YIL020C	1	0.311146		104.98		95.13		1	45.1306	41.6297	59.99	59.66	51.6	YIL020C	HIS6		Phosphoribosyl-5-amino-1-phosphoribosyl-4-imidazolecarboxiamide isomerase, catalyzes the fourth step in histidine biosynthesis; mutations cause histidine auxotrophy and sensitivity to Cu, Co, and Ni salts
310G03	YDR123C	1	0.311161		95.92		89.22		1	43.0199	40.1944	51.33	54.74	55.27	YDR123C	INO2	DIE1 SCS1	Component of the heteromeric Ino2p/Ino4p basic helix-loop-helix transcription activator that binds inositol/choline-responsive elements (ICREs), required for derepression of phospholipid biosynthetic genes in response to inositol depletion
347C05	YER119C	1	0.311174		102.03		91.96		1	45.8388	42.5071	51.57	53.6	48.87	YER119C	AVT6		Vacuolar aspartate and glutamate exporter; member of a family of seven genes (AVT1-7) related to vesicular GABA-glycine transporters; involved in compartmentalizing acidic amino acids in response to nitrogen starvation
346E04	YDR528W	1	0.311185		106.96		98.89		1	45.2527	41.6297	49.22	50.9	43.4	YDR528W	HLR1		Protein involved in regulation of cell wall composition and integrity and response to osmotic stress; overproduction suppresses a lysis sensitive PKC mutation; similar to Lre1p, which functions antagonistically to protein kinase A
316H12	YKL069W	1	0.311231		93.28		87.05		1	50.2061	43.9967	57.11	55.62	49.78	YKL069W		YKG9 fRMsr	Methionine-R-sulfoxide reductase, reduces the R enantiomer of free Met-SO, in contrast to Ycl033Cp which reduces Met-R-SO in a peptide linkage; has a role in protection against oxidative stress
331F04	YPR045C	1	0.311244		107.22		98.99		1	57.9074	54.7093	50.77	52.99	52.51	YPR045C	THP3	MNI2	Protein that forms a complex with Csn12p that is recruited to transcribed genes and may have a role in transcription elongation; possibly involved in splicing based on pre-mRNA accumulation defect for many intron-containing genes
331D10	YPR009W	1	0.311278		90.47		81.34		1	44.6411	41.6297	52.24	54.78	51.6	YPR009W	SUT2		Putative transcription factor; multicopy suppressor of mutations that cause low activity of the cAMP/protein kinase A pathway; highly similar to Sut1p
310C10	YDR067C	1	0.311318		93.66		87.14		1	42.679	40.1944	49.39	51.87	50.7	YDR067C	OCA6		Cytoplasmic protein required for replication of Brome mosaic virus in S. cerevisiae, which is a model system for studying positive-strand RNA virus replication; null mutation confers sensitivity to tunicamycin and DTT
305G02	YNL254C	1	0.311334		96.71		88.76		1	42.7637	38.7924	39.79	40.1	27.86	YNL254C	RTC4		Protein of unknown function; null mutation suppresses cdc13-1 temperature sensitivity; (GFP)-fusion protein localizes to both the cytoplasm and the nucleus
301D06	YAL013W	2	0.311362	0.00885632	104.755	1.57685	99.33	0.509117	1	45.9785	42.5071	49.71	52.95	49.78	YAL013W	DEP1	FUN54	Transcriptional modulator involved in regulation of structural phospholipid biosynthesis genes and metabolically unrelated genes, as well as maintenance of telomeres, mating efficiency, and sporulation
320A11	YLR387C	1	0.31137		87.51		79.27		1	43.4507	40.1944	46.33	47.9	45.21	YLR387C	REH1		Cytoplasmic 60S subunit biogenesis factor, associates with pre-60S particles; similar to Rei1p and shares partially redundant function in cytoplasmic 60S subunit maturation; contains dispersed C2H2 zinc finger domains
336B11	YJL028W	1	0.311418		96.32		87.52		1	44.6814	41.0516	55.09	54.43	47.05	YJL028W			Protein of unknown function; may interact with ribosomes, based on co-purification experiments
312H10	YGR136W	1	0.31144		96.79		89.81		1	47.0718	43.0989	52.07	52.78	48.87	YGR136W	LSB1		Protein containing an N-terminal SH3 domain; binds Las17p, which is a homolog of human Wiskott-Aldrich Syndrome protein involved in actin patch assembly and actin polymerization
333G12	YMR169C	1	0.311509		109.05		97.2		1	50.3268	45.2132	53.71	54.54	47.05	YMR169C	ALD3		Cytoplasmic aldehyde dehydrogenase, involved in beta-alanine synthesis; uses NAD+ as the preferred coenzyme; very similar to Ald2p; expression is induced by stress and repressed by glucose
317A10	YKL081W	1	0.311516		100.64		92.66		1	38.8902	36.0869	52.65	53.98	52.51	YKL081W	TEF4	EFC1	Gamma subunit of translational elongation factor eEF1B, stimulates the binding of aminoacyl-tRNA (AA-tRNA) to ribosomes by releasing eEF1A (Tef1p/Tef2p) from the ribosomal complex
347H08	YJR066W	3	0.311538	0.0453197	104.72	2.94802	95.3533	2.85644	1	43.8408	40.1944	51.6	52.44	44.3	YJR066W	TOR1	DRR1	PIK-related protein kinase and rapamycin target; subunit of TORC1, a complex that controls growth in response to nutrients by regulating translation, transcription, ribosome biogenesis, nutrient transport and autophagy; involved in meiosis
341F10	YNL125C	1	0.311643		100.4		91.92		1	41.4711	38.7924	48.83	51.23	54.36	YNL125C	ESBP6	MCH3	Protein with similarity to monocarboxylate permeases, appears not to be involved in transport of monocarboxylates such as lactate, pyruvate or acetate across the plasma membrane
341H05	YGR050C	1	0.311656		99.14		91.57		1	44.8681	41.6297	47.14	49.32	45.21	YGR050C
324H08	YBL060W	1	0.311693		89.08		80.56		1	43.7109	41.0516	51.06	52.88	50.7	YBL060W	YEL1		Guanine nucleotide exchange factor specific for Arf3p; localized to the bud neck and tip; required for localization of Arf3p to the bud neck and tip
BY4743	#N/A	250	0.311694	0.0519833	100.089	6.78953	91.9646	6.40358	#N/A	#N/A	#N/A	#N/A	#N/A	#N/A	#N/A
337B03	YDL162C	1	0.311721		115.35		107.15		1	43.0432	40.1944	62.13	62.78	58.93	YDL162C
309H09	YBR227C	1	0.311833		108.33		98.09		1	45.5734	42.5071	51.9	52.34	30.58	YBR227C	MCX1		Mitochondrial matrix protein; putative ATP-binding chaperone with non-proteolytic function; similar to bacterial ClpX proteins
309E10	YBR183W	1	0.311985		102.09		93.07		1	43.2356	40.1944	47.14	50.77	37.91	YBR183W	YPC1	alkaline ceramidase	Alkaline ceramidase that also has reverse (CoA-independent) ceramide synthase activity, catalyzes both breakdown and synthesis of phytoceramide; overexpression confers fumonisin B1 resistance
327A04	YDR261C	1	0.312034		94.89		85.33		1	44.615	41.0516	52.1	53.71	52.51	YDR261C	EXG2		Exo-1,3-beta-glucanase, involved in cell wall beta-glucan assembly; may be anchored to the plasma membrane via a glycosylphosphatidylinositol (GPI) anchor
307E12	YOL030W	2	0.312043	0.0139973	90.405	9.70858	82.2	9.8005	1	46.681	43.0989	52.17	52.68	51.6	YOL030W	GAS5		1,3-beta-glucanosyltransferase, has similarity to Gas1p; localizes to the cell wall
325G03	YNL233W	1	0.31206		97.65		91.92		1	46.5784	41.0516	48.16	49.35	44.3	YNL233W	BNI4		Targeting subunit for Glc7p protein phosphatase, localized to the bud neck, required for localization of chitin synthase III to the bud neck via interaction with the chitin synthase III regulatory subunit Skt5p
[truncated: 2,824 more rows]

## Sheet: INCLUDED Experiments
RMS (FL1/2-A)	Freq. G1 (FL1/2-A)	Freq. S (FL1/2-A)	Freq. G2 (FL1/2-A)	G1 Mean (FL1/2-A)	G2 Mean (FL1/2-A)	G1 cv (FL1/2-A)	G2 cv (FL1/2-A)	Freq. sub-G1 (FL1/2-A)	Freq. super-G2 (FL1/2-A)	Ungated count	Gated count	Mean (FSC-H)	Median (FSC-H)	StdDev (FSC-H)	%G1	FL1/2-A	File name	Sample ID	Corrected Sample ID	Sample ID changed?	Annotation	Include?	Plate ID	Growth date	Researcher	Qualifier
[truncated: 6,001 more rows]

[truncated: 1 more sheets: EXCLUDED Experiments]
